# Supplementary material for: Structural studies of two protonated forms of a C2 symmetrical optically active cyclam derivative
Source: Royal Society of Chemistry journal article supplement (doi:10.1039/a904998c), 2000-01-01
Supplement: a904998csf1.doc [file a904998csf1.doc]

# Supplementary data

**Structural studies of two protonated forms of a *C2* symmetrical optically active cyclam derivative**

**Ignacio Alfonso, Covadonga Astorga, Francisca Rebolledo,* Vicente Gotor,* Santiago García-Granda and Ana Tesouro**

*Departamento de Química Orgánica e Inorgánica, Universidad de Oviedo,. 33071 Oviedo, Spain*

*Departamento de Química Física y Analítica, Universidad de Oviedo, 33071 Oviedo, Spain*

Observed and calculated structure factors for **3H22+(CLO4)22-** Page 1

h k l 10Fo 10Fc 10s h k l 10Fo 10Fc 10s h k l 10Fo 10Fc 10s h k l 10Fo 10Fc 10s h k l 10Fo 10Fc 10s

2 -9 0 99 91 25 -5 -2 0 35 73 34 -2 3 0 195 193 7 1 -8 1 75 122 74 2 -2 1 706 716 10

3 -9 0 40 28 39 -4 -2 0 90 117 52 -1 3 0 185 183 6 2 -8 1 0 7 1 3 -2 1 56 41 41

4 -9 0 103 66 48 -3 -2 0 210 229 8 0 3 0 264 271 6 3 -8 1 100 119 51 4 -2 1 84 103 36

5 -9 0 55 59 55 -2 -2 0 178 187 7 1 3 0 313 316 6 4 -8 1 239 236 10 5 -2 1 86 62 11

6 -9 0 57 39 56 -1 -2 0 337 325 5 2 3 0 136 134 9 5 -8 1 35 37 35 6 -2 1 137 150 11

7 -9 0 95 41 55 0 -2 0 270 264 5 3 3 0 164 169 9 6 -8 1 0 33 1 7 -2 1 138 157 15

0 -8 0 70 17 69 1 -2 0 156 142 6 4 3 0 34 90 33 7 -8 1 99 105 63 8 -2 1 90 91 51

1 -8 0 0 69 1 2 -2 0 101 107 9 5 3 0 167 162 13 8 -8 1 0 41 1 9 -2 1 0 47 1

2 -8 0 82 89 82 3 -2 0 237 229 6 6 3 0 128 138 19 -2 -7 1 60 58 27 -7 -1 1 77 16 77

3 -8 0 114 118 14 4 -2 0 50 40 49 -9 4 0 0 44 1 -1 -7 1 0 27 1 -6 -1 1 0 83 1

4 -8 0 50 55 50 5 -2 0 201 194 8 -8 4 0 278 298 10 0 -7 1 107 112 15 -5 -1 1 84 72 39

5 -8 0 0 44 1 6 -2 0 132 112 10 -7 4 0 94 122 40 1 -7 1 48 82 48 -4 -1 1 184 178 8

6 -8 0 0 70 1 7 -2 0 181 175 10 -6 4 0 94 92 11 2 -7 1 33 30 33 -3 -1 1 265 276 6

7 -8 0 0 45 1 8 -2 0 64 21 64 -5 4 0 71 65 50 3 -7 1 65 54 65 -2 -1 1 405 378 6

8 -8 0 0 79 1 9 -2 0 62 74 61 -4 4 0 301 307 7 4 -7 1 169 164 11 -1 -1 1 849 853 8

-2 -7 0 78 24 26 -7 -1 0 88 107 88 -3 4 0 167 174 7 5 -7 1 153 138 11 0 -1 1 690 683 6

-1 -7 0 0 54 1 -6 -1 0 0 18 1 -2 4 0 76 104 37 6 -7 1 0 10 1 1 -1 1 159 153 5

0 -7 0 37 21 36 -5 -1 0 0 32 1 -1 4 0 120 139 8 7 -7 1 61 39 61 2 -1 1 618 618 9

1 -7 0 0 36 1 -4 -1 0 99 99 14 0 4 0 188 195 7 8 -7 1 118 111 21 3 -1 1 102 94 10

2 -7 0 34 69 33 -3 -1 0 187 184 8 1 4 0 166 172 9 9 -7 1 0 43 1 4 -1 1 37 35 36

3 -7 0 257 270 10 -2 -1 0 187 173 6 2 4 0 233 224 9 -3 -6 1 90 94 39 5 -1 1 72 82 41

4 -7 0 112 120 14 -1 -1 0 358 351 5 3 4 0 123 84 15 -2 -6 1 64 57 63 6 -1 1 0 29 1

5 -7 0 108 111 13 0 -1 0 694 677 6 4 4 0 216 202 12 -1 -6 1 73 44 16 7 -1 1 99 96 45

6 -7 0 97 80 50 1 -1 0 142 129 5 5 4 0 57 39 56 0 -6 1 145 133 14 8 -1 1 96 112 54

7 -7 0 0 39 1 2 -1 0 209 213 5 -9 5 0 85 46 17 1 -6 1 244 250 9 -8 0 1 0 48 1

8 -7 0 137 107 15 3 -1 0 114 114 9 -8 5 0 165 145 12 2 -6 1 127 123 13 -7 0 1 96 38 36

9 -7 0 0 46 1 4 -1 0 127 126 9 -7 5 0 132 105 11 3 -6 1 0 96 1 -6 0 1 116 115 15

-3 -6 0 82 88 81 5 -1 0 129 130 10 -6 5 0 65 58 27 4 -6 1 190 195 10 -5 0 1 0 34 1

-2 -6 0 76 99 75 6 -1 0 72 80 72 -5 5 0 114 117 11 5 -6 1 110 129 41 -4 0 1 197 181 8

-1 -6 0 121 126 16 7 -1 0 106 91 17 -4 5 0 254 245 8 6 -6 1 80 51 56 -3 0 1 332 316 6

0 -6 0 205 215 12 8 -1 0 0 42 1 -3 5 0 99 96 11 7 -6 1 65 59 28 -2 0 1 120 126 8

1 -6 0 64 59 63 -8 0 0 73 57 72 -2 5 0 245 240 8 8 -6 1 74 94 28 -1 0 1 89 65 7

2 -6 0 152 150 11 -7 0 0 37 58 37 -1 5 0 317 287 7 9 -6 1 0 73 1 0 0 1 184 183 2

3 -6 0 178 183 11 -6 0 0 132 126 15 0 5 0 303 287 8 -4 -5 1 0 16 1 1 0 1 183 175 4

4 -6 0 162 157 11 -5 0 0 0 24 1 1 5 0 0 33 1 -3 -5 1 0 58 1 2 0 1 429 438 7

5 -6 0 63 79 46 -4 0 0 112 99 12 2 5 0 201 219 12 -2 -5 1 0 72 1 3 0 1 137 130 8

6 -6 0 198 204 11 -3 0 0 129 133 8 3 5 0 73 76 73 -1 -5 1 70 96 69 4 0 1 83 87 33

7 -6 0 68 34 68 -2 0 0 728 712 10 4 5 0 0 35 1 0 -5 1 174 168 9 5 0 1 0 74 1

8 -6 0 0 32 1 -1 0 0 44 60 43 -9 6 0 65 63 65 1 -5 1 33 35 33 6 0 1 0 85 1

9 -6 0 54 63 54 1 0 0 57 64 33 -8 6 0 55 33 30 2 -5 1 302 318 7 7 0 1 91 60 51

-4 -5 0 99 36 45 2 0 0 694 712 10 -7 6 0 0 33 1 3 -5 1 162 158 8 8 0 1 73 35 72

-3 -5 0 85 80 18 3 0 0 137 131 8 -6 6 0 173 204 12 4 -5 1 215 198 8 -8 1 1 77 91 76

-2 -5 0 221 218 11 4 0 0 48 97 48 -5 6 0 31 79 31 5 -5 1 68 61 67 -7 1 1 91 99 49

-1 -5 0 0 32 1 5 0 0 0 27 1 -4 6 0 147 155 10 6 -5 1 0 19 1 -6 1 1 55 56 55

0 -5 0 296 288 8 6 0 0 111 126 15 -3 6 0 194 183 9 7 -5 1 83 100 45 -5 1 1 29 75 29

1 -5 0 287 284 8 7 0 0 69 57 33 -2 6 0 152 151 9 8 -5 1 0 79 1 -4 1 1 196 177 7

2 -5 0 253 242 7 8 0 0 0 58 1 -1 6 0 60 55 23 9 -5 1 52 49 52 -3 1 1 156 128 9

3 -5 0 82 98 54 -8 1 0 0 42 1 0 6 0 197 216 10 -5 -4 1 97 139 55 -2 1 1 1336 1367 9

4 -5 0 249 248 8 -7 1 0 49 91 49 1 6 0 139 126 13 -4 -4 1 151 159 14 -1 1 1 219 212 4

5 -5 0 93 117 45 -6 1 0 92 78 16 2 6 0 83 100 48 -3 -4 1 75 99 21 0 1 1 484 486 7

6 -5 0 45 58 45 -5 1 0 140 131 11 3 6 0 80 90 80 -2 -4 1 134 150 11 1 1 1 264 256 5

7 -5 0 128 104 11 -4 1 0 117 126 10 -9 7 0 0 45 1 -1 -4 1 363 384 7 2 1 1 519 507 7

8 -5 0 151 145 13 -3 1 0 112 122 10 -8 7 0 118 108 19 0 -4 1 257 261 7 3 1 1 64 50 44

9 -5 0 52 44 52 -2 1 0 210 213 5 -7 7 0 0 41 1 1 -4 1 127 133 9 4 1 1 163 144 10

-5 -4 0 0 41 1 -1 1 0 144 133 5 -6 7 0 68 79 67 2 -4 1 317 329 7 5 1 1 111 114 15

-4 -4 0 218 202 11 0 1 0 687 675 6 -5 7 0 87 112 40 3 -4 1 182 178 8 6 1 1 68 52 34

-3 -4 0 114 88 14 1 1 0 353 350 5 -4 7 0 103 120 44 4 -4 1 213 222 9 7 1 1 130 108 16

-2 -4 0 216 222 10 2 1 0 177 176 6 -3 7 0 272 269 10 5 -4 1 76 24 29 -9 2 1 43 39 43

-1 -4 0 183 173 10 3 1 0 176 186 8 -2 7 0 88 66 34 6 -4 1 122 108 9 -8 2 1 108 62 17

0 -4 0 217 194 7 4 1 0 105 99 13 -1 7 0 69 37 68 7 -4 1 74 69 73 -7 2 1 181 172 10

1 -4 0 155 135 8 5 1 0 0 29 1 0 7 0 51 21 50 8 -4 1 264 267 10 -6 2 1 54 64 53

2 -4 0 68 106 68 6 1 0 36 19 35 1 7 0 0 54 1 9 -4 1 60 39 38 -5 2 1 0 36 1

3 -4 0 180 174 8 7 1 0 139 106 15 2 7 0 0 24 1 -6 -3 1 57 41 57 -4 2 1 402 409 6

4 -4 0 304 308 7 -9 2 0 61 72 61 -8 8 0 115 80 19 -5 -3 1 81 85 81 -3 2 1 250 236 6

5 -4 0 90 70 15 -8 2 0 52 23 51 -7 8 0 32 46 32 -4 -3 1 201 224 11 -2 2 1 377 364 5

6 -4 0 72 93 71 -7 2 0 175 173 11 -6 8 0 0 71 1 -3 -3 1 91 113 45 -1 2 1 1164 1155 9

7 -4 0 52 126 52 -6 2 0 115 113 12 -5 8 0 86 42 39 -2 -3 1 39 54 38 0 2 1 142 150 6

8 -4 0 306 298 9 -5 2 0 180 196 10 -4 8 0 0 53 1 -1 -3 1 375 363 6 1 2 1 345 344 5

9 -4 0 87 45 50 -4 2 0 65 40 30 -3 8 0 118 117 16 0 -3 1 229 224 6 2 2 1 138 131 8

-6 -3 0 102 137 71 -3 2 0 222 227 6 -2 8 0 72 89 72 1 -3 1 159 168 7 3 2 1 95 97 36

-5 -3 0 106 163 55 -2 2 0 114 108 8 -1 8 0 60 71 38 2 -3 1 400 397 6 4 2 1 94 85 14

-4 -3 0 34 90 34 -1 2 0 138 142 6 0 8 0 0 17 1 3 -3 1 340 339 6 5 2 1 86 34 14

-3 -3 0 170 168 9 0 2 0 252 262 5 -7 9 0 66 43 35 4 -3 1 44 82 44 6 2 1 106 98 17

-2 -3 0 128 132 11 1 2 0 326 325 5 -6 9 0 56 40 55 5 -3 1 120 127 9 7 2 1 0 32 1

-1 -3 0 306 318 7 2 2 0 189 185 8 -5 9 0 75 59 22 6 -3 1 402 390 8 -9 3 1 108 110 18

0 -3 0 273 270 7 3 2 0 224 229 8 -4 9 0 86 67 49 7 -3 1 84 64 32 -8 3 1 220 211 10

1 -3 0 183 177 8 4 2 0 105 116 13 -3 9 0 0 27 1 8 -3 1 0 27 1 -7 3 1 45 51 44

2 -3 0 186 189 8 5 2 0 104 74 17 -2 9 0 125 91 17 9 -3 1 0 17 1 -6 3 1 78 57 29

3 -3 0 244 233 6 6 2 0 0 22 1 1 -9 1 126 94 50 -7 -2 1 0 70 1 -5 3 1 37 67 36

4 -3 0 116 129 11 7 2 0 61 5 60 2 -9 1 40 12 39 -6 -2 1 74 81 74 -4 3 1 318 299 7

5 -3 0 0 86 1 -9 3 0 99 72 56 3 -9 1 0 60 1 -5 -2 1 76 101 75 -3 3 1 143 139 8

6 -3 0 83 67 38 -8 3 0 93 114 69 4 -9 1 54 85 54 -4 -2 1 152 130 11 -2 3 1 193 205 7

7 -3 0 131 111 10 -7 3 0 78 112 78 5 -9 1 0 52 1 -3 -2 1 227 229 7 -1 3 1 339 346 5

8 -3 0 103 115 21 -6 3 0 0 67 1 6 -9 1 88 80 51 -2 -2 1 301 291 6 0 3 1 741 751 10

9 -3 0 0 73 1 -5 3 0 91 85 34 7 -9 1 72 13 72 -1 -2 1 179 172 6 1 3 1 227 215 7

-7 -2 0 60 3 44 -4 3 0 133 132 9 -1 -8 1 49 24 48 0 -2 1 575 585 8 2 3 1 319 314 7

-6 -2 0 50 23 50 -3 3 0 228 237 7 0 -8 1 79 90 78 1 -2 1 834 838 9 3 3 1 197 184 10

Observed and calculated structure factors for **3H22+(CLO4)22-** Page 2

h k l 10Fo 10Fc 10s h k l 10Fo 10Fc 10s h k l 10Fo 10Fc 10s h k l 10Fo 10Fc 10s h k l 10Fo 10Fc 10s

4 3 1 121 98 15 7 -8 2 69 57 23 7 -2 2 90 131 41 -6 4 2 303 304 8 3 -7 3 147 146 11

5 3 1 75 76 75 8 -8 2 91 88 72 8 -2 2 153 149 15 -5 4 2 140 146 10 4 -7 3 192 199 10

6 3 1 202 201 16 -2 -7 2 40 53 40 -7 -1 2 0 91 1 -4 4 2 85 104 56 5 -7 3 75 70 20

-9 4 1 0 78 1 -1 -7 2 132 82 12 -6 -1 2 91 110 57 -3 4 2 156 166 10 6 -7 3 91 121 50

-8 4 1 170 179 12 0 -7 2 61 38 61 -5 -1 2 81 78 15 -2 4 2 299 302 7 7 -7 3 91 81 20

-7 4 1 84 54 38 1 -7 2 34 145 33 -4 -1 2 220 227 8 -1 4 2 137 146 10 8 -7 3 0 18 1

-6 4 1 0 45 1 2 -7 2 229 229 10 -3 -1 2 134 144 8 0 4 2 56 70 55 -4 -6 3 111 70 16

-5 4 1 137 142 10 3 -7 2 117 110 11 -2 -1 2 118 107 8 1 4 2 87 73 14 -3 -6 3 68 73 67

-4 4 1 117 109 11 4 -7 2 93 73 42 -1 -1 2 1153 1172 8 2 4 2 290 270 9 -2 -6 3 0 69 1

-3 4 1 0 51 1 5 -7 2 114 113 15 0 -1 2 570 546 7 3 4 2 0 30 1 -1 -6 3 156 174 14

-2 4 1 170 164 7 6 -7 2 90 36 34 1 -1 2 359 344 5 4 4 2 236 218 12 0 -6 3 190 184 11

-1 4 1 223 218 7 7 -7 2 72 90 29 2 -1 2 1026 1049 9 5 4 2 0 16 1 1 -6 3 239 245 8

0 4 1 255 248 7 8 -7 2 85 63 19 3 -1 2 124 120 7 -9 5 2 96 39 15 2 -6 3 53 47 52

1 4 1 96 113 13 9 -7 2 101 50 46 4 -1 2 214 208 7 -8 5 2 64 51 63 3 -6 3 229 227 9

2 4 1 205 187 9 -3 -6 2 68 45 68 5 -1 2 264 262 8 -7 5 2 79 85 21 4 -6 3 139 142 10

3 4 1 148 147 14 -2 -6 2 52 29 51 6 -1 2 0 53 1 -6 5 2 131 104 13 5 -6 3 0 40 1

4 4 1 126 118 16 -1 -6 2 0 25 1 7 -1 2 101 65 15 -5 5 2 96 100 19 6 -6 3 137 150 14

5 4 1 41 55 40 0 -6 2 413 421 9 8 -1 2 81 92 22 -4 5 2 85 119 49 7 -6 3 59 69 33

-9 5 1 81 117 81 1 -6 2 101 99 15 -8 0 2 0 49 1 -3 5 2 128 133 10 8 -6 3 70 29 70

-8 5 1 0 33 1 2 -6 2 389 387 7 -7 0 2 62 47 61 -2 5 2 179 179 9 9 -6 3 86 47 50

-7 5 1 0 71 1 3 -6 2 87 106 21 -6 0 2 57 65 37 -1 5 2 350 353 7 -5 -5 3 77 30 77

-6 5 1 63 130 63 4 -6 2 114 116 13 -5 0 2 160 159 10 0 5 2 98 117 38 -4 -5 3 0 16 1

-5 5 1 107 118 11 5 -6 2 70 63 20 -4 0 2 243 248 8 1 5 2 143 139 11 -3 -5 3 106 170 63

-4 5 1 126 138 10 6 -6 2 93 77 21 -3 0 2 33 80 33 2 5 2 225 238 11 -2 -5 3 300 306 11

-3 5 1 176 163 9 7 -6 2 67 94 67 -2 0 2 518 520 7 3 5 2 97 86 19 -1 -5 3 145 142 12

-2 5 1 249 248 7 8 -6 2 70 36 69 -1 0 2 200 199 4 4 5 2 82 49 44 0 -5 3 0 56 1

-1 5 1 58 61 58 9 -6 2 76 23 75 0 0 2 538 591 5 -9 6 2 0 47 1 1 -5 3 375 368 7

0 5 1 107 112 14 -5 -5 2 0 62 1 1 0 2 340 317 5 -8 6 2 0 83 1 2 -5 3 119 114 11

1 5 1 91 95 41 -4 -5 2 121 138 15 2 0 2 606 603 9 -7 6 2 121 104 10 3 -5 3 149 152 9

2 5 1 157 162 13 -3 -5 2 35 48 35 3 0 2 193 199 7 -6 6 2 0 37 1 4 -5 3 134 121 10

3 5 1 53 100 52 -2 -5 2 142 128 11 4 0 2 158 167 10 -5 6 2 115 137 17 5 -5 3 61 71 61

4 5 1 0 99 1 -1 -5 2 109 108 15 5 0 2 122 115 12 -4 6 2 178 190 9 6 -5 3 63 7 62

-9 6 1 160 156 15 0 -5 2 148 140 9 6 0 2 134 120 13 -3 6 2 223 218 9 7 -5 3 0 75 1

-8 6 1 87 97 49 1 -5 2 145 132 7 7 0 2 84 30 35 -2 6 2 126 128 11 8 -5 3 41 84 41

-7 6 1 58 100 58 2 -5 2 157 161 9 8 0 2 0 20 1 -1 6 2 98 124 43 9 -5 3 0 33 1

-6 6 1 176 194 13 3 -5 2 267 275 7 -8 1 2 54 94 53 0 6 2 68 118 68 -5 -4 3 82 86 27

-5 6 1 63 79 63 4 -5 2 187 192 9 -7 1 2 68 28 67 1 6 2 72 78 72 -4 -4 3 79 53 78

-4 6 1 127 106 11 5 -5 2 43 34 42 -6 1 2 0 72 1 2 6 2 77 44 41 -3 -4 3 98 129 43

-3 6 1 138 133 10 6 -5 2 82 92 82 -5 1 2 134 131 11 3 6 2 78 54 28 -2 -4 3 348 340 9

-2 6 1 192 196 9 7 -5 2 290 281 9 -4 1 2 231 223 8 -9 7 2 0 30 1 -1 -4 3 239 239 8

-1 6 1 53 81 53 8 -5 2 47 26 46 -3 1 2 166 161 9 -8 7 2 144 150 15 0 -4 3 170 173 9

0 6 1 50 63 50 9 -5 2 67 66 34 -2 1 2 1291 1271 9 -7 7 2 50 41 50 1 -4 3 317 305 6

1 6 1 87 90 86 -5 -4 2 109 93 15 -1 1 2 296 298 4 -6 7 2 48 7 48 2 -4 3 151 157 8

2 6 1 76 93 75 -4 -4 2 163 184 13 0 1 2 382 387 5 -5 7 2 34 66 33 3 -4 3 145 156 8

3 6 1 0 23 1 -3 -4 2 139 143 12 1 1 2 267 267 5 -4 7 2 162 184 13 4 -4 3 132 99 10

-9 7 1 0 56 1 -2 -4 2 52 55 52 2 1 2 115 107 9 -3 7 2 128 119 11 5 -4 3 207 195 9

-8 7 1 167 162 13 -1 -4 2 131 134 10 3 1 2 0 61 1 -2 7 2 59 53 59 6 -4 3 144 131 9

-7 7 1 61 33 60 0 -4 2 177 165 8 4 1 2 43 100 42 -1 7 2 141 154 14 7 -4 3 70 91 70

-6 7 1 72 107 29 1 -4 2 140 123 8 5 1 2 47 88 47 0 7 2 0 69 1 8 -4 3 183 177 11

-5 7 1 47 100 46 2 -4 2 288 295 7 6 1 2 101 74 16 1 7 2 0 30 1 9 -4 3 0 61 1

-4 7 1 166 178 10 3 -4 2 154 169 8 7 1 2 0 83 1 2 7 2 59 1 59 -6 -3 3 193 185 15

-3 7 1 87 109 40 4 -4 2 27 36 27 -9 2 2 0 54 1 -8 8 2 105 72 16 -5 -3 3 0 41 1

-2 7 1 293 312 10 5 -4 2 189 183 8 -8 2 2 0 40 1 -7 8 2 38 77 38 -4 -3 3 76 51 21

-1 7 1 134 110 12 6 -4 2 154 145 9 -7 2 2 157 157 12 -6 8 2 99 95 19 -3 -3 3 99 139 44

0 7 1 0 59 1 7 -4 2 0 35 1 -6 2 2 88 92 19 -5 8 2 91 97 22 -2 -3 3 260 275 8

1 7 1 116 115 21 8 -4 2 95 107 43 -5 2 2 58 61 57 -4 8 2 88 110 49 -1 -3 3 65 97 65

2 7 1 0 52 1 9 -4 2 0 10 1 -4 2 2 164 160 8 -3 8 2 96 98 52 0 -3 3 255 261 6

-8 8 1 92 50 73 -6 -3 2 80 60 80 -3 2 2 193 189 7 -2 8 2 0 85 1 1 -3 3 335 329 5

-7 8 1 103 92 15 -5 -3 2 62 75 25 -2 2 2 259 264 5 -1 8 2 0 35 1 2 -3 3 457 462 7

-6 8 1 102 109 40 -4 -3 2 130 129 16 -1 2 2 355 367 5 0 8 2 41 66 40 3 -3 3 217 221 6

-5 8 1 70 68 70 -3 -3 2 208 211 9 0 2 2 321 324 5 -6 9 2 71 84 70 4 -3 3 211 214 7

-4 8 1 0 58 1 -2 -3 2 141 133 8 1 2 2 329 327 6 -5 9 2 105 97 49 5 -3 3 72 80 54

-3 8 1 132 139 13 -1 -3 2 179 197 8 2 2 2 0 66 1 -4 9 2 0 58 1 6 -3 3 470 478 7

-2 8 1 63 69 63 0 -3 2 171 179 6 3 2 2 139 139 10 -3 9 2 81 69 43 7 -3 3 0 53 1

-1 8 1 54 64 53 1 -3 2 413 422 6 4 2 2 179 187 10 -2 9 2 59 46 59 8 -3 3 169 161 13

0 8 1 0 21 1 2 -3 2 154 165 8 5 2 2 0 33 1 1 -9 3 0 24 1 9 -3 3 71 45 70

-7 9 1 60 34 60 3 -3 2 64 83 63 6 2 2 87 31 36 2 -9 3 0 82 1 -7 -2 3 84 42 83

-6 9 1 110 68 17 4 -3 2 0 43 1 7 2 2 0 56 1 3 -9 3 55 65 55 -6 -2 3 51 53 51

-5 9 1 67 21 67 5 -3 2 0 53 1 -9 3 2 0 56 1 4 -9 3 0 14 1 -5 -2 3 144 131 10

-4 9 1 0 57 1 6 -3 2 171 181 8 -8 3 2 60 54 60 5 -9 3 95 102 43 -4 -2 3 169 168 10

-3 9 1 0 53 1 7 -3 2 64 22 64 -7 3 2 91 117 36 6 -9 3 163 147 14 -3 -2 3 83 100 37

-2 9 1 0 46 1 8 -3 2 87 87 39 -6 3 2 219 227 9 7 -9 3 41 61 41 -2 -2 3 42 91 42

1 -9 2 62 61 62 9 -3 2 0 36 1 -5 3 2 116 127 9 -1 -8 3 84 38 84 -1 -2 3 233 229 6

2 -9 2 40 43 39 -7 -2 2 103 98 58 -4 3 2 212 197 8 0 -8 3 78 61 78 0 -2 3 134 144 7

3 -9 2 67 83 67 -6 -2 2 82 130 81 -3 3 2 394 385 6 1 -8 3 26 53 26 1 -2 3 370 391 5

4 -9 2 0 33 1 -5 -2 2 149 136 11 -2 3 2 348 366 6 2 -8 3 140 117 14 2 -2 3 555 560 8

5 -9 2 38 78 38 -4 -2 2 92 94 12 -1 3 2 250 255 6 3 -8 3 94 46 36 3 -2 3 117 123 8

6 -9 2 79 56 42 -3 -2 2 90 86 10 0 3 2 94 105 11 4 -8 3 61 48 61 4 -2 3 234 239 6

7 -9 2 41 52 41 -2 -2 2 287 291 6 1 3 2 70 87 69 5 -8 3 50 35 50 5 -2 3 93 62 12

-1 -8 2 103 76 59 -1 -2 2 226 224 5 2 3 2 112 115 12 6 -8 3 135 107 14 6 -2 3 73 83 16

0 -8 2 0 26 1 0 -2 2 229 221 5 3 3 2 96 66 13 7 -8 3 66 50 28 7 -2 3 91 121 42

1 -8 2 74 62 40 1 -2 2 239 237 5 4 3 2 0 53 1 8 -8 3 37 20 36 8 -2 3 0 27 1

2 -8 2 143 137 15 2 -2 2 430 449 6 5 3 2 65 101 44 -2 -7 3 70 39 70 -8 -1 3 0 56 1

3 -8 2 0 78 1 3 -2 2 180 177 6 6 3 2 111 75 42 -1 -7 3 0 78 1 -7 -1 3 85 58 35

4 -8 2 78 114 78 4 -2 2 183 187 7 -9 4 2 97 40 20 0 -7 3 0 109 1 -6 -1 3 45 35 45

5 -8 2 79 115 79 5 -2 2 122 117 12 -8 4 2 166 164 11 1 -7 3 127 131 14 -5 -1 3 83 96 62

6 -8 2 81 28 46 6 -2 2 209 181 9 -7 4 2 42 86 41 2 -7 3 332 324 9 -4 -1 3 200 202 9

Observed and calculated structure factors for **3H22+(CLO4)22-** Page 3

h k l 10Fo 10Fc 10s h k l 10Fo 10Fc 10s h k l 10Fo 10Fc 10s h k l 10Fo 10Fc 10s h k l 10Fo 10Fc 10s

-3 -1 3 0 22 1 1 4 3 44 16 43 0 -6 4 282 298 10 6 -1 4 102 98 45 -4 5 4 162 163 12

-2 -1 3 85 80 10 2 4 3 58 116 57 1 -6 4 112 106 11 7 -1 4 0 91 1 -3 5 4 43 45 42

-1 -1 3 469 469 7 3 4 3 168 180 14 2 -6 4 146 157 9 8 -1 4 0 13 1 -2 5 4 171 153 8

0 -1 3 395 388 6 4 4 3 67 44 67 3 -6 4 193 181 8 -8 0 4 0 67 1 -1 5 4 165 142 10

1 -1 3 197 202 5 5 4 3 59 22 58 4 -6 4 83 104 38 -7 0 4 0 49 1 0 5 4 202 200 10

2 -1 3 159 159 6 -9 5 3 76 69 27 5 -6 4 91 111 47 -6 0 4 164 163 11 1 5 4 151 141 12

3 -1 3 148 130 6 -8 5 3 72 96 57 6 -6 4 119 116 15 -5 0 4 0 87 1 2 5 4 58 72 58

4 -1 3 213 209 7 -7 5 3 238 224 9 7 -6 4 77 22 44 -4 0 4 87 38 10 3 5 4 68 43 67

5 -1 3 154 149 10 -6 5 3 221 211 10 8 -6 4 101 131 40 -3 0 4 458 465 6 4 5 4 93 39 38

6 -1 3 57 63 57 -5 5 3 122 124 11 9 -6 4 0 72 1 -2 0 4 85 93 11 -9 6 4 0 45 1

7 -1 3 81 50 34 -4 5 3 277 272 9 -5 -5 4 0 77 1 -1 0 4 266 274 4 -8 6 4 97 76 53

8 -1 3 80 40 79 -3 5 3 84 140 62 -4 -5 4 0 18 1 0 0 4 846 916 8 -7 6 4 34 56 33

-8 0 3 0 27 1 -2 5 3 101 106 15 -3 -5 4 0 40 1 1 0 4 343 351 5 -6 6 4 121 122 12

-7 0 3 153 113 14 -1 5 3 162 153 10 -2 -5 4 307 308 9 2 0 4 54 69 53 -5 6 4 152 139 12

-6 0 3 268 278 9 0 5 3 140 135 11 -1 -5 4 238 234 8 3 0 4 194 208 8 -4 6 4 152 165 12

-5 0 3 0 43 1 1 5 3 0 72 1 0 -5 4 155 159 10 4 0 4 87 74 13 -3 6 4 101 112 43

-4 0 3 107 91 10 2 5 3 51 47 51 1 -5 4 186 194 8 5 0 4 93 118 61 -2 6 4 176 165 12

-3 0 3 209 218 7 3 5 3 0 15 1 2 -5 4 163 160 8 6 0 4 175 172 14 -1 6 4 113 99 15

-2 0 3 353 368 5 4 5 3 0 89 1 3 -5 4 125 122 9 7 0 4 144 121 16 0 6 4 79 45 79

-1 0 3 301 313 4 -9 6 3 81 61 81 4 -5 4 167 160 9 -8 1 4 183 198 15 1 6 4 106 91 42

0 0 3 399 433 5 -8 6 3 0 10 1 5 -5 4 140 129 13 -7 1 4 78 76 18 2 6 4 88 55 51

1 0 3 449 426 6 -7 6 3 92 97 21 6 -5 4 0 65 1 -6 1 4 84 106 83 3 6 4 59 22 58

2 0 3 393 390 5 -6 6 3 88 108 24 7 -5 4 88 92 17 -5 1 4 73 76 51 -8 7 4 177 160 13

3 0 3 298 295 6 -5 6 3 124 109 12 8 -5 4 147 138 12 -4 1 4 128 140 10 -7 7 4 36 26 36

4 0 3 163 180 9 -4 6 3 139 162 11 9 -5 4 0 56 1 -3 1 4 289 273 6 -6 7 4 111 106 12

5 0 3 71 65 71 -3 6 3 242 229 9 -6 -4 4 0 36 1 -2 1 4 141 135 6 -5 7 4 86 106 20

6 0 3 0 15 1 -2 6 3 109 108 12 -5 -4 4 89 87 21 -1 1 4 319 320 4 -4 7 4 112 133 47

7 0 3 110 110 19 -1 6 3 81 83 37 -4 -4 4 0 93 1 0 1 4 333 331 5 -3 7 4 77 75 76

8 0 3 0 42 1 0 6 3 173 176 11 -3 -4 4 54 37 34 1 1 4 266 263 6 -2 7 4 85 93 32

-8 1 3 38 83 37 1 6 3 64 66 63 -2 -4 4 0 83 1 2 1 4 65 71 15 -1 7 4 36 89 36

-7 1 3 97 77 13 2 6 3 95 71 19 -1 -4 4 39 92 39 3 1 4 109 124 11 0 7 4 0 35 1

-6 1 3 148 167 11 3 6 3 0 74 1 0 -4 4 188 185 7 4 1 4 250 234 9 1 7 4 70 40 69

-5 1 3 126 119 11 -8 7 3 157 139 15 1 -4 4 236 239 7 5 1 4 99 95 51 -8 8 4 63 97 62

-4 1 3 104 80 10 -7 7 3 0 123 1 2 -4 4 142 136 8 6 1 4 33 39 32 -7 8 4 0 25 1

-3 1 3 142 131 8 -6 7 3 170 185 11 3 -4 4 65 103 64 7 1 4 0 19 1 -6 8 4 0 43 1

-2 1 3 1358 1380 9 -5 7 3 0 40 1 4 -4 4 161 157 9 -9 2 4 0 18 1 -5 8 4 51 67 51

-1 1 3 279 288 4 -4 7 3 116 128 14 5 -4 4 154 175 10 -8 2 4 80 105 80 -4 8 4 126 161 47

0 1 3 978 1008 8 -3 7 3 34 85 33 6 -4 4 15 26 14 -7 2 4 149 139 13 -3 8 4 0 55 1

1 1 3 404 398 6 -2 7 3 144 139 14 7 -4 4 32 27 31 -6 2 4 109 108 13 -2 8 4 0 52 1

2 1 3 53 37 53 -1 7 3 96 44 37 8 -4 4 0 12 1 -5 2 4 66 52 66 -1 8 4 103 116 30

3 1 3 217 216 8 0 7 3 0 101 1 9 -4 4 0 15 1 -4 2 4 401 387 6 -6 9 4 0 29 1

4 1 3 189 185 9 1 7 3 89 72 37 -6 -3 4 63 55 24 -3 2 4 216 191 6 -5 9 4 0 32 1

5 1 3 0 48 1 -8 8 3 0 45 1 -5 -3 4 71 85 70 -2 2 4 279 283 6 -4 9 4 77 75 28

6 1 3 65 63 33 -7 8 3 0 41 1 -4 -3 4 210 197 11 -1 2 4 190 191 6 -3 9 4 0 23 1

7 1 3 0 60 1 -6 8 3 82 113 47 -3 -3 4 245 242 8 0 2 4 137 141 8 1 -9 5 0 48 1

-9 2 3 107 86 75 -5 8 3 0 80 1 -2 -3 4 223 214 8 1 2 4 251 258 7 2 -9 5 70 53 70

-8 2 3 72 81 72 -4 8 3 102 99 17 -1 -3 4 218 215 7 2 2 4 262 253 7 3 -9 5 101 37 15

-7 2 3 0 28 1 -3 8 3 0 50 1 0 -3 4 607 602 9 3 2 4 190 179 10 4 -9 5 96 98 67

-6 2 3 364 350 9 -2 8 3 38 57 37 1 -3 4 234 238 6 4 2 4 90 77 49 5 -9 5 46 56 46

-5 2 3 140 134 13 -1 8 3 0 12 1 2 -3 4 73 74 31 5 2 4 37 63 36 6 -9 5 99 69 45

-4 2 3 437 421 7 0 8 3 42 9 41 3 -3 4 174 178 6 6 2 4 80 59 80 7 -9 5 73 43 72

-3 2 3 218 205 6 -6 9 3 59 28 26 4 -3 4 254 244 7 -9 3 4 71 92 71 -1 -8 5 0 21 1

-2 2 3 192 199 7 -5 9 3 70 76 70 5 -3 4 112 104 9 -8 3 4 0 84 1 0 -8 5 108 64 15

-1 2 3 243 232 5 -4 9 3 90 50 52 6 -3 4 41 67 40 -7 3 4 195 193 12 1 -8 5 0 99 1

0 2 3 329 323 6 -3 9 3 0 44 1 7 -3 4 108 88 14 -6 3 4 250 242 9 2 -8 5 37 22 36

1 2 3 235 236 6 1 -9 4 84 10 83 8 -3 4 129 135 17 -5 3 4 53 46 52 3 -8 5 96 82 36

2 2 3 176 175 8 2 -9 4 73 77 27 9 -3 4 0 24 1 -4 3 4 298 303 7 4 -8 5 151 151 18

3 2 3 84 47 15 3 -9 4 68 67 67 -7 -2 4 42 52 41 -3 3 4 207 189 8 5 -8 5 184 161 12

4 2 3 86 67 20 4 -9 4 67 9 66 -6 -2 4 73 69 27 -2 3 4 111 116 9 6 -8 5 65 67 64

5 2 3 208 197 12 5 -9 4 0 32 1 -5 -2 4 74 29 31 -1 3 4 112 117 9 7 -8 5 64 61 31

6 2 3 0 16 1 6 -9 4 66 36 28 -4 -2 4 160 165 10 0 3 4 322 317 6 8 -8 5 117 74 46

-9 3 3 92 127 91 7 -9 4 93 133 73 -3 -2 4 88 100 41 1 3 4 226 225 9 -2 -7 5 71 58 70

-8 3 3 49 63 49 -1 -8 4 0 46 1 -2 -2 4 123 118 8 2 3 4 255 256 9 -1 -7 5 65 41 65

-7 3 3 0 21 1 0 -8 4 88 56 36 -1 -2 4 300 319 6 3 3 4 135 158 15 0 -7 5 0 37 1

-6 3 3 252 262 9 1 -8 4 0 64 1 0 -2 4 343 337 5 4 3 4 114 128 16 1 -7 5 0 60 1

-5 3 3 93 84 12 2 -8 4 89 106 61 1 -2 4 353 337 5 5 3 4 0 39 1 2 -7 5 68 86 67

-4 3 3 0 44 1 3 -8 4 101 108 46 2 -2 4 382 378 5 6 3 4 73 80 72 3 -7 5 134 142 16

-3 3 3 197 195 7 4 -8 4 157 155 12 3 -2 4 155 160 7 -9 4 4 36 39 36 4 -7 5 59 29 58

-2 3 3 141 138 8 5 -8 4 0 24 1 4 -2 4 825 813 11 -8 4 4 109 111 16 5 -7 5 105 106 15

-1 3 3 421 410 6 6 -8 4 82 94 82 5 -2 4 164 173 9 -7 4 4 198 207 9 6 -7 5 127 107 15

0 3 3 681 670 10 7 -8 4 0 39 1 6 -2 4 177 179 11 -6 4 4 210 199 10 7 -7 5 37 74 36

1 3 3 228 238 8 8 -8 4 108 45 41 7 -2 4 0 69 1 -5 4 4 288 277 8 8 -7 5 86 98 86

2 3 3 261 246 9 -2 -7 4 103 85 17 8 -2 4 0 95 1 -4 4 4 280 274 7 -4 -6 5 0 55 1

3 3 3 74 88 59 -1 -7 4 83 86 65 -8 -1 4 0 49 1 -3 4 4 113 119 11 -3 -6 5 0 59 1

4 3 3 117 131 16 0 -7 4 86 109 60 -7 -1 4 0 111 1 -2 4 4 466 476 7 -2 -6 5 128 124 12

5 3 3 0 55 1 1 -7 4 76 67 75 -6 -1 4 68 95 67 -1 4 4 286 278 8 -1 -6 5 176 179 11

6 3 3 94 26 54 2 -7 4 168 170 14 -5 -1 4 140 136 10 0 4 4 185 177 9 0 -6 5 144 136 11

-9 4 3 0 10 1 3 -7 4 0 71 1 -4 -1 4 77 80 57 1 4 4 83 111 62 1 -6 5 84 66 45

-8 4 3 0 32 1 4 -7 4 201 217 10 -3 -1 4 190 185 8 2 4 4 34 35 33 2 -6 5 193 189 10

-7 4 3 80 86 51 5 -7 4 76 86 21 -2 -1 4 293 309 6 3 4 4 64 53 63 3 -6 5 190 186 9

-6 4 3 0 91 1 6 -7 4 0 13 1 -1 -1 4 249 243 5 4 4 4 218 210 14 4 -6 5 57 66 32

-5 4 3 30 52 30 7 -7 4 0 9 1 0 -1 4 1018 1027 8 5 4 4 72 48 71 5 -6 5 33 47 32

-4 4 3 77 59 56 8 -7 4 97 63 23 1 -1 4 537 562 8 -9 5 4 0 15 1 6 -6 5 0 75 1

-3 4 3 190 179 9 -4 -6 4 77 25 76 2 -1 4 286 281 5 -8 5 4 34 25 33 7 -6 5 49 60 49

-2 4 3 409 411 7 -3 -6 4 87 103 51 3 -1 4 159 150 7 -7 5 4 57 42 57 8 -6 5 52 37 51

-1 4 3 39 108 38 -2 -6 4 124 122 14 4 -1 4 198 203 8 -6 5 4 106 123 44 -5 -5 5 0 35 1

0 4 3 134 135 9 -1 -6 4 0 47 1 5 -1 4 150 168 9 -5 5 4 0 12 1 -4 -5 5 55 63 55

Observed and calculated structure factors for **3H22+(CLO4)22-**  Page 4

h k l 10Fo 10Fc 10s h k l 10Fo 10Fc 10s h k l 10Fo 10Fc 10s h k l 10Fo 10Fc 10s h k l 10Fo 10Fc 10s

-3 -5 5 87 79 39 2 0 5 185 189 7 -2 6 5 141 145 14 5 -4 6 74 75 73 -6 2 6 145 147 12

-2 -5 5 99 115 16 3 0 5 508 499 7 -1 6 5 69 117 69 6 -4 6 100 84 13 -5 2 6 252 256 8

-1 -5 5 226 228 9 4 0 5 42 25 42 0 6 5 72 78 72 7 -4 6 85 86 18 -4 2 6 144 148 10

0 -5 5 307 287 8 5 0 5 156 128 12 1 6 5 54 55 54 8 -4 6 0 35 1 -3 2 6 366 356 6

1 -5 5 146 143 10 6 0 5 90 84 63 2 6 5 73 95 37 -6 -3 6 0 31 1 -2 2 6 329 348 6

2 -5 5 232 232 8 7 0 5 97 60 55 -8 7 5 0 14 1 -5 -3 6 112 108 48 -1 2 6 0 79 1

3 -5 5 116 111 12 -8 1 5 173 178 12 -7 7 5 52 54 51 -4 -3 6 224 227 10 0 2 6 66 88 65

4 -5 5 97 101 14 -7 1 5 147 149 12 -6 7 5 92 51 35 -3 -3 6 153 159 10 1 2 6 133 136 8

5 -5 5 88 98 58 -6 1 5 206 187 10 -5 7 5 180 193 13 -2 -3 6 153 167 9 2 2 6 185 182 9

6 -5 5 0 23 1 -5 1 5 226 215 9 -4 7 5 91 89 25 -1 -3 6 185 172 8 3 2 6 156 156 12

7 -5 5 82 44 57 -4 1 5 378 380 7 -3 7 5 92 98 35 0 -3 6 767 747 10 4 2 6 68 29 18

8 -5 5 142 133 12 -3 1 5 248 233 6 -2 7 5 88 63 40 1 -3 6 114 113 8 5 2 6 0 16 1

9 -5 5 0 33 1 -2 1 5 587 586 9 -1 7 5 83 87 48 2 -3 6 65 62 48 6 2 6 101 104 22

-6 -4 5 66 90 65 -1 1 5 281 303 5 0 7 5 67 40 67 3 -3 6 262 258 7 -9 3 6 43 64 42

-5 -4 5 0 43 1 0 1 5 354 371 5 1 7 5 0 23 1 4 -3 6 47 25 47 -8 3 6 202 196 11

-4 -4 5 310 301 11 1 1 5 60 2 27 -7 8 5 70 46 69 5 -3 6 78 70 49 -7 3 6 135 152 18

-3 -4 5 92 132 42 2 1 5 214 219 7 -6 8 5 0 76 1 6 -3 6 318 318 10 -6 3 6 373 367 9

-2 -4 5 132 123 11 3 1 5 75 107 19 -5 8 5 0 9 1 7 -3 6 53 75 52 -5 3 6 274 283 7

-1 -4 5 301 290 8 4 1 5 274 270 9 -4 8 5 32 37 32 8 -3 6 0 71 1 -4 3 6 0 46 1

0 -4 5 258 256 7 5 1 5 96 120 29 -3 8 5 126 95 12 -7 -2 6 42 23 42 -3 3 6 238 228 7

1 -4 5 103 100 11 6 1 5 120 125 24 -2 8 5 55 47 55 -6 -2 6 110 98 15 -2 3 6 139 129 9

2 -4 5 0 23 1 7 1 5 0 6 1 -1 8 5 40 52 40 -5 -2 6 188 188 10 -1 3 6 132 110 10

3 -4 5 151 173 8 -9 2 5 45 19 45 1 -9 6 43 59 42 -4 -2 6 173 177 11 0 3 6 154 144 8

4 -4 5 189 193 9 -8 2 5 0 17 1 2 -9 6 0 27 1 -3 -2 6 262 261 7 1 3 6 61 67 25

5 -4 5 238 247 8 -7 2 5 204 216 11 3 -9 6 56 63 56 -2 -2 6 301 321 7 2 3 6 81 160 80

6 -4 5 210 199 9 -6 2 5 225 215 8 4 -9 6 48 23 48 -1 -2 6 409 422 6 3 3 6 279 288 11

7 -4 5 0 73 1 -5 2 5 42 69 42 5 -9 6 191 150 14 0 -2 6 155 175 7 4 3 6 47 56 47

8 -4 5 108 114 43 -4 2 5 625 586 9 6 -9 6 0 66 1 1 -2 6 237 236 6 5 3 6 80 64 43

9 -4 5 46 35 46 -3 2 5 213 201 7 -1 -8 6 61 27 60 2 -2 6 72 69 42 -9 4 6 60 45 59

-6 -3 5 89 88 71 -2 2 5 294 298 6 0 -8 6 72 66 26 3 -2 6 119 112 9 -8 4 6 158 162 15

-5 -3 5 0 68 1 -1 2 5 204 199 7 1 -8 6 0 49 1 4 -2 6 269 277 8 -7 4 6 0 52 1

-4 -3 5 80 139 46 0 2 5 78 79 11 2 -8 6 0 45 1 5 -2 6 126 126 13 -6 4 6 147 156 10

-3 -3 5 105 111 13 1 2 5 0 58 1 3 -8 6 134 107 12 6 -2 6 196 203 13 -5 4 6 103 98 12

-2 -3 5 201 204 9 2 2 5 131 144 11 4 -8 6 249 244 11 7 -2 6 52 31 51 -4 4 6 0 64 1

-1 -3 5 111 91 11 3 2 5 0 115 1 5 -8 6 89 72 19 8 -2 6 68 68 67 -3 4 6 421 446 8

0 -3 5 121 112 9 4 2 5 194 205 11 6 -8 6 100 84 38 -8 -1 6 0 28 1 -2 4 6 169 154 9

1 -3 5 0 44 1 5 2 5 105 115 18 7 -8 6 68 78 68 -7 -1 6 84 59 48 -1 4 6 30 41 29

2 -3 5 150 132 7 6 2 5 114 112 26 8 -8 6 41 11 41 -6 -1 6 0 34 1 0 4 6 244 244 10

3 -3 5 334 342 6 -9 3 5 103 66 58 -2 -7 6 0 39 1 -5 -1 6 0 68 1 1 4 6 70 68 16

4 -3 5 135 140 9 -8 3 5 79 76 45 -1 -7 6 76 63 41 -4 -1 6 221 232 9 2 4 6 71 145 71

5 -3 5 142 136 9 -7 3 5 47 71 46 0 -7 6 129 118 14 -3 -1 6 116 126 11 3 4 6 110 88 15

6 -3 5 89 143 65 -6 3 5 77 80 44 1 -7 6 0 62 1 -2 -1 6 265 262 6 4 4 6 0 30 1

7 -3 5 0 20 1 -5 3 5 150 142 9 2 -7 6 177 152 11 -1 -1 6 278 279 5 -9 5 6 75 15 74

8 -3 5 110 123 17 -4 3 5 86 105 47 3 -7 6 68 81 31 0 -1 6 432 440 6 -8 5 6 0 34 1

-7 -2 5 0 23 1 -3 3 5 53 47 52 4 -7 6 133 118 12 1 -1 6 322 335 5 -7 5 6 92 50 36

-6 -2 5 0 43 1 -2 3 5 89 120 35 5 -7 6 0 51 1 2 -1 6 753 795 10 -6 5 6 95 113 47

-5 -2 5 140 127 14 -1 3 5 299 317 7 6 -7 6 0 19 1 3 -1 6 102 101 10 -5 5 6 66 81 28

-4 -2 5 69 74 68 0 3 5 0 23 1 7 -7 6 106 94 48 4 -1 6 138 141 14 -4 5 6 389 391 8

-3 -2 5 164 158 9 1 3 5 138 142 11 8 -7 6 39 60 38 5 -1 6 0 54 1 -3 5 6 197 207 9

-2 -2 5 245 236 7 2 3 5 72 102 71 -4 -6 6 46 67 45 6 -1 6 155 165 13 -2 5 6 155 142 11

-1 -2 5 272 271 6 3 3 5 135 125 12 -3 -6 6 126 117 16 7 -1 6 0 96 1 -1 5 6 65 40 65

0 -2 5 317 321 5 4 3 5 38 25 37 -2 -6 6 66 7 21 8 -1 6 40 33 40 0 5 6 139 137 13

1 -2 5 330 328 5 5 3 5 80 38 43 -1 -6 6 84 110 48 -8 0 6 41 42 41 1 5 6 81 25 63

2 -2 5 112 105 7 -9 4 5 0 43 1 0 -6 6 304 292 9 -7 0 6 0 41 1 2 5 6 111 90 15

3 -2 5 107 101 10 -8 4 5 79 105 78 1 -6 6 71 87 71 -6 0 6 131 122 12 3 5 6 0 54 1

4 -2 5 257 254 7 -7 4 5 126 126 14 2 -6 6 187 164 9 -5 0 6 167 175 10 -9 6 6 112 76 64

5 -2 5 29 96 29 -6 4 5 43 95 43 3 -6 6 45 53 44 -4 0 6 201 199 8 -8 6 6 83 105 35

6 -2 5 61 55 44 -5 4 5 312 316 8 4 -6 6 216 222 10 -3 0 6 102 108 10 -7 6 6 127 105 12

7 -2 5 0 30 1 -4 4 5 215 207 9 5 -6 6 95 122 62 -2 0 6 311 304 6 -6 6 6 234 238 11

8 -2 5 67 80 67 -3 4 5 220 225 8 6 -6 6 34 23 34 -1 0 6 0 17 1 -5 6 6 0 21 1

-8 -1 5 95 88 94 -2 4 5 363 349 7 7 -6 6 118 130 20 0 0 6 0 43 1 -4 6 6 168 171 10

-7 -1 5 149 142 15 -1 4 5 117 105 9 8 -6 6 110 115 17 1 0 6 107 104 9 -3 6 6 178 191 12

-6 -1 5 76 62 31 0 4 5 155 146 10 -5 -5 6 0 28 1 2 0 6 160 163 7 -2 6 6 116 110 14

-5 -1 5 182 196 10 1 4 5 103 140 40 -4 -5 6 0 85 1 3 0 6 141 134 10 -1 6 6 70 78 70

-4 -1 5 97 126 40 2 4 5 86 67 85 -3 -5 6 136 108 13 4 0 6 115 115 14 0 6 6 133 120 11

-3 -1 5 191 189 8 3 4 5 68 73 29 -2 -5 6 74 46 31 5 0 6 209 200 10 1 6 6 54 53 54

-2 -1 5 123 128 7 4 4 5 0 22 1 -1 -5 6 140 141 10 6 0 6 62 70 46 2 6 6 55 43 41

-1 -1 5 195 194 6 -9 5 5 0 50 1 0 -5 6 76 60 14 7 0 6 0 56 1 -8 7 6 41 54 40

0 -1 5 351 344 5 -8 5 5 191 173 12 1 -5 6 135 142 9 -8 1 6 153 179 17 -7 7 6 82 86 66

1 -1 5 234 239 5 -7 5 5 33 72 33 2 -5 6 0 57 1 -7 1 6 0 44 1 -6 7 6 50 86 49

2 -1 5 270 276 6 -6 5 5 138 129 14 3 -5 6 89 125 58 -6 1 6 204 199 9 -5 7 6 104 168 46

3 -1 5 244 230 6 -5 5 5 141 150 11 4 -5 6 229 229 8 -5 1 6 52 39 52 -4 7 6 0 30 1

4 -1 5 80 96 14 -4 5 5 270 271 8 5 -5 6 104 90 14 -4 1 6 40 33 39 -3 7 6 141 127 14

5 -1 5 126 117 13 -3 5 5 87 115 50 6 -5 6 131 127 12 -3 1 6 236 224 7 -2 7 6 0 78 1

6 -1 5 227 219 12 -2 5 5 188 186 9 7 -5 6 84 71 84 -2 1 6 192 203 7 -1 7 6 53 39 53

7 -1 5 0 68 1 -1 5 5 126 116 11 8 -5 6 63 39 63 -1 1 6 54 73 54 0 7 6 68 75 67

8 -1 5 60 39 50 0 5 5 129 138 12 -6 -4 6 0 19 1 0 1 6 106 95 8 1 7 6 0 62 1

-8 0 5 71 82 71 1 5 5 0 140 1 -5 -4 6 55 102 55 1 1 6 119 134 8 -7 8 6 0 22 1

-7 0 5 0 29 1 2 5 5 232 232 11 -4 -4 6 0 121 1 2 1 6 294 315 7 -6 8 6 102 76 39

-6 0 5 65 54 27 3 5 5 0 54 1 -3 -4 6 258 253 9 3 1 6 90 97 14 -5 8 6 38 73 37

-5 0 5 123 114 11 -9 6 5 93 82 34 -2 -4 6 220 220 8 4 1 6 117 86 13 -4 8 6 53 65 53

-4 0 5 199 177 9 -8 6 5 75 110 74 -1 -4 6 205 196 8 5 1 6 82 83 82 -3 8 6 94 84 43

-3 0 5 281 267 7 -7 6 5 116 132 17 0 -4 6 57 73 21 6 1 6 87 43 50 -2 8 6 56 57 55

-2 0 5 324 320 5 -6 6 5 136 132 14 1 -4 6 210 200 7 7 1 6 0 10 1 -1 8 6 0 21 1

-1 0 5 532 554 8 -5 6 5 149 145 13 2 -4 6 109 116 11 -9 2 6 129 62 51 1 -9 7 0 60 1

0 0 5 902 958 9 -4 6 5 103 105 14 3 -4 6 80 56 12 -8 2 6 124 90 14 2 -9 7 91 63 73

1 0 5 411 399 6 -3 6 5 191 179 10 4 -4 6 60 57 18 -7 2 6 66 65 65 3 -9 7 117 111 20

Observed and calculated structure factors for **3H22+(CLO4)22-** Page 5

h k l 10Fo 10Fc 10s h k l 10Fo 10Fc 10s h k l 10Fo 10Fc 10s h k l 10Fo 10Fc 10s h k l 10Fo 10Fc 10s

4 -9 7 97 60 44 1 -2 7 83 94 30 -7 4 7 104 117 16 6 -6 8 80 118 79 2 0 8 181 182 8

5 -9 7 69 37 28 2 -2 7 138 132 9 -6 4 7 291 281 8 7 -6 8 82 79 82 3 0 8 159 164 10

6 -9 7 158 163 16 3 -2 7 101 101 11 -5 4 7 82 94 17 8 -6 8 77 40 21 4 0 8 183 172 11

-1 -8 7 39 40 38 4 -2 7 0 113 1 -4 4 7 30 94 30 -5 -5 8 0 45 1 5 0 8 179 165 16

0 -8 7 98 61 44 5 -2 7 165 182 11 -3 4 7 155 151 10 -4 -5 8 56 48 55 6 0 8 0 77 1

1 -8 7 0 61 1 6 -2 7 169 179 14 -2 4 7 265 256 8 -3 -5 8 223 232 11 7 0 8 0 43 1

2 -8 7 83 79 34 7 -2 7 75 60 75 -1 4 7 54 22 53 -2 -5 8 34 24 33 -8 1 8 56 41 56

3 -8 7 97 86 37 8 -2 7 39 85 39 0 4 7 135 143 14 -1 -5 8 131 128 11 -7 1 8 130 131 14

4 -8 7 0 78 1 -7 -1 7 0 44 1 1 4 7 100 109 16 0 -5 8 148 149 10 -6 1 8 170 165 11

5 -8 7 184 182 13 -6 -1 7 212 211 11 2 4 7 110 84 16 1 -5 8 61 108 60 -5 1 8 179 176 10

6 -8 7 38 30 38 -5 -1 7 58 71 38 3 4 7 68 43 68 2 -5 8 238 231 8 -4 1 8 230 235 8

7 -8 7 96 96 44 -4 -1 7 111 113 12 4 4 7 90 70 72 3 -5 8 120 120 13 -3 1 8 280 269 7

-2 -7 7 0 62 1 -3 -1 7 124 111 11 -9 5 7 44 67 43 4 -5 8 203 199 9 -2 1 8 0 59 1

-1 -7 7 53 85 53 -2 -1 7 240 235 8 -8 5 7 0 41 1 5 -5 8 164 153 11 -1 1 8 160 166 7

0 -7 7 94 65 16 -1 -1 7 230 227 7 -7 5 7 127 134 13 6 -5 8 128 120 13 0 1 8 207 204 6

1 -7 7 187 183 12 0 -1 7 201 192 6 -6 5 7 192 192 10 7 -5 8 0 48 1 1 1 8 247 240 7

2 -7 7 97 128 44 1 -1 7 225 228 6 -5 5 7 152 143 11 8 -5 8 100 27 38 2 1 8 90 91 36

3 -7 7 84 77 18 2 -1 7 775 769 10 -4 5 7 212 218 9 -5 -4 8 99 66 15 3 1 8 182 185 10

4 -7 7 85 109 84 3 -1 7 237 232 8 -3 5 7 208 213 9 -4 -4 8 80 117 63 4 1 8 260 257 11

5 -7 7 62 93 61 4 -1 7 309 310 8 -2 5 7 207 209 10 -3 -4 8 172 195 12 5 1 8 104 84 19

6 -7 7 89 88 51 5 -1 7 199 183 10 -1 5 7 48 31 47 -2 -4 8 157 144 10 6 1 8 57 57 57

7 -7 7 75 113 74 6 -1 7 0 31 1 0 5 7 35 68 35 -1 -4 8 130 109 10 -8 2 8 63 75 34

8 -7 7 95 29 43 7 -1 7 0 74 1 1 5 7 162 117 11 0 -4 8 99 100 37 -7 2 8 83 85 47

-4 -6 7 102 44 42 -8 0 7 43 80 42 2 5 7 87 95 87 1 -4 8 28 31 28 -6 2 8 285 285 10

-3 -6 7 0 64 1 -7 0 7 62 129 62 3 5 7 80 30 80 2 -4 8 227 230 7 -5 2 8 67 67 67

-2 -6 7 135 128 14 -6 0 7 165 179 11 -8 6 7 54 38 54 3 -4 8 98 83 11 -4 2 8 364 354 7

-1 -6 7 124 131 13 -5 0 7 113 182 49 -7 6 7 60 9 60 4 -4 8 91 86 36 -3 2 8 182 179 7

0 -6 7 78 85 20 -4 0 7 0 76 1 -6 6 7 196 198 11 5 -4 8 72 100 72 -2 2 8 27 64 26

1 -6 7 125 100 10 -3 0 7 297 286 7 -5 6 7 74 78 73 6 -4 8 103 122 46 -1 2 8 38 29 37

2 -6 7 241 242 9 -2 0 7 509 503 7 -4 6 7 0 74 1 7 -4 8 52 89 51 0 2 8 257 257 8

3 -6 7 91 106 36 -1 0 7 43 21 43 -3 6 7 0 77 1 8 -4 8 178 168 13 1 2 8 68 111 67

4 -6 7 66 68 65 0 0 7 42 71 42 -2 6 7 104 128 20 -6 -3 8 177 164 16 2 2 8 437 433 9

5 -6 7 76 82 16 1 0 7 138 139 7 -1 6 7 0 41 1 -5 -3 8 0 47 1 3 2 8 165 144 13

6 -6 7 131 133 14 2 0 7 306 328 7 0 6 7 53 100 53 -4 -3 8 144 141 12 4 2 8 153 156 16

7 -6 7 102 110 20 3 0 7 107 99 11 1 6 7 0 77 1 -3 -3 8 319 321 9 5 2 8 54 24 53

8 -6 7 0 45 1 4 0 7 272 282 10 2 6 7 0 21 1 -2 -3 8 132 114 10 -9 3 8 117 88 28

-5 -5 7 0 106 1 5 0 7 166 166 12 -8 7 7 0 76 1 -1 -3 8 338 323 8 -8 3 8 52 31 52

-4 -5 7 103 78 66 6 0 7 103 112 47 -7 7 7 75 50 40 0 -3 8 132 130 9 -7 3 8 152 133 13

-3 -5 7 50 31 50 7 0 7 0 42 1 -6 7 7 72 64 71 1 -3 8 101 103 10 -6 3 8 261 260 10

-2 -5 7 345 337 9 -8 1 7 146 133 15 -5 7 7 123 149 15 2 -3 8 260 265 7 -5 3 8 43 48 42

-1 -5 7 32 46 31 -7 1 7 34 50 34 -4 7 7 91 92 18 3 -3 8 253 254 8 -4 3 8 211 210 8

0 -5 7 43 55 42 -6 1 7 130 116 13 -3 7 7 95 72 44 4 -3 8 320 324 8 -3 3 8 104 115 12

1 -5 7 59 60 58 -5 1 7 362 341 8 -2 7 7 104 98 48 5 -3 8 210 218 9 -2 3 8 82 72 14

2 -5 7 241 246 8 -4 1 7 104 109 19 -1 7 7 94 75 43 6 -3 8 61 12 60 -1 3 8 66 52 66

3 -5 7 191 191 9 -3 1 7 356 347 6 0 7 7 0 20 1 7 -3 8 0 61 1 0 3 8 77 109 20

4 -5 7 229 221 9 -2 1 7 249 256 6 -7 8 7 75 76 74 8 -3 8 83 96 28 1 3 8 0 47 1

5 -5 7 65 101 64 -1 1 7 45 68 44 -6 8 7 80 9 43 -7 -2 8 99 34 57 2 3 8 108 121 43

6 -5 7 236 224 10 0 1 7 109 97 8 -5 8 7 55 79 54 -6 -2 8 123 136 55 3 3 8 39 133 38

7 -5 7 79 61 78 1 1 7 199 204 7 -4 8 7 49 37 49 -5 -2 8 83 114 58 4 3 8 106 155 58

8 -5 7 98 66 38 2 1 7 156 151 9 -3 8 7 0 54 1 -4 -2 8 157 157 9 5 3 8 0 52 1

-5 -4 7 0 31 1 3 1 7 78 98 77 -2 8 7 57 28 56 -3 -2 8 127 113 11 -9 4 8 93 17 92

-4 -4 7 149 142 14 4 1 7 344 324 10 1 -9 8 0 18 1 -2 -2 8 355 362 7 -8 4 8 0 21 1

-3 -4 7 81 53 36 5 1 7 205 194 13 2 -9 8 72 33 71 -1 -2 8 249 237 7 -7 4 8 0 14 1

-2 -4 7 166 154 10 6 1 7 0 142 1 3 -9 8 0 60 1 0 -2 8 177 175 7 -6 4 8 73 50 72

-1 -4 7 152 164 10 -9 2 7 126 96 22 4 -9 8 81 96 32 1 -2 8 218 227 6 -5 4 8 108 118 12

0 -4 7 74 49 46 -8 2 7 37 95 36 5 -9 8 73 47 27 2 -2 8 361 367 6 -4 4 8 53 65 53

1 -4 7 138 132 9 -7 2 7 47 86 47 6 -9 8 0 71 1 3 -2 8 215 195 8 -3 4 8 87 111 34

2 -4 7 161 152 8 -6 2 7 199 178 9 -1 -8 8 136 130 22 4 -2 8 464 457 8 -2 4 8 146 124 11

3 -4 7 150 139 9 -5 2 7 81 79 17 0 -8 8 40 39 40 5 -2 8 96 116 18 -1 4 8 79 103 55

4 -4 7 51 51 50 -4 2 7 126 132 9 1 -8 8 109 82 57 6 -2 8 148 134 13 0 4 8 48 59 47

5 -4 7 157 161 11 -3 2 7 150 146 10 2 -8 8 14 91 14 7 -2 8 77 25 77 1 4 8 183 144 12

6 -4 7 236 224 10 -2 2 7 186 186 8 3 -8 8 0 40 1 8 -2 8 55 27 55 2 4 8 0 83 1

7 -4 7 0 20 1 -1 2 7 260 241 6 4 -8 8 84 112 83 -7 -1 8 0 39 1 3 4 8 0 22 1

8 -4 7 81 95 30 0 2 7 136 146 10 5 -8 8 93 109 65 -6 -1 8 0 59 1 4 4 8 57 18 56

-6 -3 7 70 30 69 1 2 7 40 89 40 6 -8 8 39 25 38 -5 -1 8 123 128 12 -8 5 8 0 60 1

-5 -3 7 96 83 16 2 2 7 240 253 9 7 -8 8 0 46 1 -4 -1 8 242 251 8 -7 5 8 129 146 17

-4 -3 7 110 120 42 3 2 7 90 127 24 -2 -7 8 92 94 74 -3 -1 8 338 326 8 -6 5 8 116 156 48

-3 -3 7 158 160 10 4 2 7 151 146 13 -1 -7 8 86 57 49 -2 -1 8 185 180 8 -5 5 8 258 258 10

-2 -3 7 95 138 36 5 2 7 89 59 71 0 -7 8 63 61 27 -1 -1 8 88 87 10 -4 5 8 301 285 10

-1 -3 7 43 85 42 6 2 7 81 27 44 1 -7 8 0 61 1 0 -1 8 73 62 31 -3 5 8 135 115 12

0 -3 7 318 305 7 -9 3 7 45 63 44 2 -7 8 237 256 10 1 -1 8 33 52 33 -2 5 8 93 64 17

1 -3 7 145 135 8 -8 3 7 0 57 1 3 -7 8 197 180 12 2 -1 8 396 396 6 -1 5 8 104 133 46

2 -3 7 126 125 8 -7 3 7 56 55 22 4 -7 8 87 145 86 3 -1 8 0 66 1 0 5 8 36 41 36

3 -3 7 360 354 7 -6 3 7 119 115 12 5 -7 8 112 107 16 4 -1 8 84 126 45 1 5 8 0 88 1

4 -3 7 123 128 10 -5 3 7 135 137 9 6 -7 8 139 103 14 5 -1 8 79 48 63 2 5 8 0 18 1

5 -3 7 81 79 15 -4 3 7 193 189 9 7 -7 8 0 33 1 6 -1 8 142 148 15 3 5 8 114 75 45

6 -3 7 0 40 1 -3 3 7 205 211 8 8 -7 8 39 63 38 7 -1 8 39 61 39 -8 6 8 0 108 1

7 -3 7 89 58 18 -2 3 7 167 170 8 -4 -6 8 66 64 66 -8 0 8 0 68 1 -7 6 8 36 21 35

8 -3 7 0 17 1 -1 3 7 247 240 8 -3 -6 8 0 21 1 -7 0 8 132 147 16 -6 6 8 75 18 22

-7 -2 7 86 40 86 0 3 7 60 92 59 -2 -6 8 74 43 40 -6 0 8 208 206 10 -5 6 8 48 7 47

-6 -2 7 145 130 13 1 3 7 64 41 63 -1 -6 8 128 142 15 -5 0 8 32 68 31 -4 6 8 170 171 10

-5 -2 7 111 91 15 2 3 7 91 100 42 0 -6 8 118 106 12 -4 0 8 86 65 17 -3 6 8 60 58 59

-4 -2 7 124 143 12 3 3 7 37 51 37 1 -6 8 0 25 1 -3 0 8 39 26 39 -2 6 8 71 73 71

-3 -2 7 83 123 61 4 3 7 39 49 39 2 -6 8 167 154 10 -2 0 8 212 202 7 -1 6 8 64 77 64

-2 -2 7 435 402 7 5 3 7 0 9 1 3 -6 8 165 152 10 -1 0 8 33 59 32 0 6 8 122 87 18

-1 -2 7 528 503 8 -9 4 7 109 56 23 4 -6 8 115 115 15 0 0 8 65 112 48 1 6 8 98 23 44

0 -2 7 40 32 40 -8 4 7 51 81 50 5 -6 8 194 190 10 1 0 8 190 194 7 -7 7 8 55 30 55

Observed and calculated structure factors for **3H22+(CLO4)22-** Page 6

h k l 10Fo 10Fc 10s h k l 10Fo 10Fc 10s h k l 10Fo 10Fc 10s h k l 10Fo 10Fc 10s h k l 10Fo 10Fc 10s

-6 7 8 0 63 1 7 -3 9 0 36 1 3 3 9 79 52 78 6 -5 10 99 89 16 3 1 10 36 56 36

-5 7 8 0 61 1 8 -3 9 102 41 39 4 3 9 70 101 69 7 -5 10 63 59 37 4 1 10 77 68 30

-4 7 8 150 131 13 -7 -2 9 79 55 78 -8 4 9 126 96 16 8 -5 10 0 13 1 5 1 10 99 75 56

-3 7 8 151 133 14 -6 -2 9 0 68 1 -7 4 9 180 190 10 -5 -4 10 117 77 46 6 1 10 39 69 39

-2 7 8 0 50 1 -5 -2 9 169 162 11 -6 4 9 73 24 42 -4 -4 10 210 216 11 -8 2 10 103 105 25

-1 7 8 115 87 14 -4 -2 9 161 156 12 -5 4 9 266 253 8 -3 -4 10 48 58 48 -7 2 10 179 174 12

0 7 8 80 94 43 -3 -2 9 302 290 8 -4 4 9 166 167 12 -2 -4 10 177 180 11 -6 2 10 0 32 1

-6 8 8 0 36 1 -2 -2 9 168 162 9 -3 4 9 129 118 11 -1 -4 10 0 63 1 -5 2 10 170 186 11

-5 8 8 70 85 69 -1 -2 9 138 127 9 -2 4 9 72 60 16 0 -4 10 214 211 9 -4 2 10 227 227 8

-4 8 8 47 36 46 0 -2 9 123 120 9 -1 4 9 99 86 13 1 -4 10 0 51 1 -3 2 10 139 130 10

-3 8 8 0 38 1 1 -2 9 124 126 9 0 4 9 123 109 15 2 -4 10 157 147 10 -2 2 10 131 142 12

2 -9 9 0 50 1 2 -2 9 203 211 7 1 4 9 168 153 12 3 -4 10 209 198 8 -1 2 10 42 77 42

3 -9 9 77 54 28 3 -2 9 91 119 35 2 4 9 110 104 44 4 -4 10 159 153 14 0 2 10 69 65 21

4 -9 9 70 40 70 4 -2 9 231 248 12 3 4 9 80 139 79 5 -4 10 79 80 45 1 2 10 187 185 10

5 -9 9 0 26 1 5 -2 9 86 91 39 -8 5 9 69 89 27 6 -4 10 199 184 13 2 2 10 201 198 12

6 -9 9 41 62 40 6 -2 9 220 199 11 -7 5 9 0 47 1 7 -4 10 77 52 41 3 2 10 176 167 14

-1 -8 9 76 29 76 7 -2 9 0 62 1 -6 5 9 116 73 11 8 -4 10 0 32 1 4 2 10 168 163 17

0 -8 9 41 35 40 -7 -1 9 105 76 40 -5 5 9 0 34 1 -6 -3 10 74 21 74 5 2 10 76 61 20

1 -8 9 0 35 1 -6 -1 9 130 140 14 -4 5 9 101 119 18 -5 -3 10 82 81 82 -8 3 10 78 88 78

2 -8 9 0 56 1 -5 -1 9 123 140 15 -3 5 9 0 37 1 -4 -3 10 143 124 13 -7 3 10 91 82 18

3 -8 9 66 101 65 -4 -1 9 394 396 8 -2 5 9 68 78 68 -3 -3 10 177 171 11 -6 3 10 61 17 33

4 -8 9 93 22 53 -3 -1 9 588 554 8 -1 5 9 51 100 50 -2 -3 10 172 176 11 -5 3 10 73 78 72

5 -8 9 109 95 43 -2 -1 9 163 160 8 0 5 9 117 91 15 -1 -3 10 42 76 41 -4 3 10 43 26 42

6 -8 9 55 98 55 -1 -1 9 201 205 7 1 5 9 55 15 54 0 -3 10 106 95 12 -3 3 10 43 36 42

7 -8 9 89 25 37 0 -1 9 202 219 7 2 5 9 0 31 1 1 -3 10 72 60 14 -2 3 10 76 25 35

-2 -7 9 0 7 1 1 -1 9 381 405 6 -8 6 9 91 20 38 2 -3 10 71 55 50 -1 3 10 0 78 1

-1 -7 9 80 89 24 2 -1 9 137 138 8 -7 6 9 81 75 64 3 -3 10 171 186 12 0 3 10 379 362 9

0 -7 9 37 74 37 3 -1 9 188 187 9 -6 6 9 206 243 11 4 -3 10 223 217 10 1 3 10 176 141 12

1 -7 9 0 16 1 4 -1 9 249 235 10 -5 6 9 171 150 11 5 -3 10 36 84 35 2 3 10 193 172 13

2 -7 9 80 73 79 5 -1 9 0 19 1 -4 6 9 128 120 14 6 -3 10 228 217 12 3 3 10 80 35 80

3 -7 9 198 188 12 6 -1 9 55 102 54 -3 6 9 107 60 14 7 -3 10 0 2 1 4 3 10 57 45 56

4 -7 9 158 152 15 7 -1 9 39 50 39 -2 6 9 0 57 1 -7 -2 10 95 26 51 -8 4 10 65 17 64

5 -7 9 133 127 12 -8 0 9 0 46 1 -1 6 9 0 72 1 -6 -2 10 84 72 21 -7 4 10 71 33 30

6 -7 9 123 120 15 -7 0 9 73 76 30 0 6 9 39 50 38 -5 -2 10 69 58 69 -6 4 10 69 65 40

7 -7 9 54 45 54 -6 0 9 170 183 13 1 6 9 66 71 65 -4 -2 10 65 115 65 -5 4 10 145 144 10

-3 -6 9 108 55 41 -5 0 9 63 83 30 -7 7 9 41 56 40 -3 -2 10 52 52 32 -4 4 10 155 151 10

-2 -6 9 159 131 13 -4 0 9 134 135 12 -6 7 9 170 159 14 -2 -2 10 224 221 8 -3 4 10 76 94 28

-1 -6 9 94 84 43 -3 0 9 279 279 7 -5 7 9 26 74 26 -1 -2 10 195 197 8 -2 4 10 143 142 13

0 -6 9 137 145 13 -2 0 9 131 119 9 -4 7 9 76 35 19 0 -2 10 272 266 7 -1 4 10 65 35 17

1 -6 9 34 57 33 -1 0 9 230 235 7 -3 7 9 0 33 1 1 -2 10 201 204 7 0 4 10 97 123 44

2 -6 9 0 82 1 0 0 9 347 346 6 -2 7 9 64 99 48 2 -2 10 29 17 28 1 4 10 134 120 14

3 -6 9 164 150 12 1 0 9 267 263 7 -1 7 9 56 38 55 3 -2 10 133 113 11 2 4 10 69 52 69

4 -6 9 173 171 11 2 0 9 117 105 10 -5 8 9 129 126 18 4 -2 10 131 121 14 3 4 10 40 40 40

5 -6 9 50 134 50 3 0 9 194 218 10 -4 8 9 82 95 82 5 -2 10 64 49 63 -8 5 10 84 69 83

6 -6 9 0 79 1 4 0 9 201 223 13 2 -9 10 60 43 59 6 -2 10 95 46 43 -7 5 10 0 43 1

7 -6 9 88 70 24 5 0 9 43 54 43 3 -9 10 83 51 82 7 -2 10 78 84 77 -6 5 10 85 81 21

8 -6 9 76 61 76 6 0 9 69 25 68 4 -9 10 71 119 70 -7 -1 10 82 57 44 -5 5 10 0 61 1

-4 -5 9 69 71 69 -8 1 9 0 52 1 5 -9 10 71 18 70 -6 -1 10 80 67 63 -4 5 10 84 71 27

-3 -5 9 73 70 39 -7 1 9 102 113 18 0 -8 10 72 56 71 -5 -1 10 154 136 10 -3 5 10 115 97 12

-2 -5 9 142 158 23 -6 1 9 169 157 13 1 -8 10 0 116 1 -4 -1 10 198 190 9 -2 5 10 130 100 11

-1 -5 9 66 95 65 -5 1 9 108 128 46 2 -8 10 0 38 1 -3 -1 10 74 96 74 -1 5 10 118 110 13

0 -5 9 144 137 10 -4 1 9 209 209 8 3 -8 10 0 23 1 -2 -1 10 40 72 40 0 5 10 0 46 1

1 -5 9 147 140 11 -3 1 9 27 35 27 4 -8 10 267 250 12 -1 -1 10 85 96 36 1 5 10 112 105 51

2 -5 9 188 177 9 -2 1 9 45 31 44 5 -8 10 0 46 1 0 -1 10 116 112 10 2 5 10 89 14 37

3 -5 9 65 53 26 -1 1 9 0 44 1 6 -8 10 95 116 35 1 -1 10 82 68 16 -8 6 10 133 112 18

4 -5 9 74 95 73 0 1 9 116 108 10 7 -8 10 36 48 36 2 -1 10 58 105 58 -7 6 10 92 95 65

5 -5 9 188 187 11 1 1 9 86 81 34 -2 -7 10 61 29 60 3 -1 10 98 87 13 -6 6 10 195 200 12

6 -5 9 0 46 1 2 1 9 100 112 39 -1 -7 10 0 24 1 4 -1 10 188 173 11 -5 6 10 0 42 1

7 -5 9 128 129 17 3 1 9 299 301 10 0 -7 10 57 68 41 5 -1 10 100 83 18 -4 6 10 161 169 13

8 -5 9 0 72 1 4 1 9 66 105 65 1 -7 10 82 103 82 6 -1 10 148 108 14 -3 6 10 0 53 1

-5 -4 9 57 81 56 5 1 9 40 19 39 2 -7 10 60 35 31 7 -1 10 55 40 54 -2 6 10 0 81 1

-4 -4 9 152 151 14 6 1 9 0 10 1 3 -7 10 0 91 1 -8 0 10 142 105 20 -1 6 10 55 108 54

-3 -4 9 48 15 47 -8 2 9 0 92 1 4 -7 10 0 57 1 -7 0 10 68 20 21 0 6 10 0 46 1

-2 -4 9 123 125 14 -7 2 9 0 45 1 5 -7 10 98 80 22 -6 0 10 142 150 15 -7 7 10 0 39 1

-1 -4 9 217 207 9 -6 2 9 0 36 1 6 -7 10 0 37 1 -5 0 10 137 114 15 -6 7 10 0 63 1

0 -4 9 113 105 12 -5 2 9 42 70 42 7 -7 10 110 93 20 -4 0 10 126 122 10 -5 7 10 0 58 1

1 -4 9 147 147 9 -4 2 9 40 83 39 -3 -6 10 0 26 1 -3 0 10 78 16 29 -4 7 10 91 45 21

2 -4 9 226 235 8 -3 2 9 0 26 1 -2 -6 10 0 38 1 -2 0 10 179 173 8 -3 7 10 88 79 18

3 -4 9 126 124 10 -2 2 9 165 161 9 -1 -6 10 156 140 12 -1 0 10 241 252 8 -2 7 10 0 36 1

4 -4 9 302 305 9 -1 2 9 110 104 10 0 -6 10 0 23 1 0 0 10 210 218 8 -1 7 10 57 43 56

5 -4 9 105 105 13 0 2 9 120 112 11 1 -6 10 249 237 10 1 0 10 102 105 12 2 -9 11 0 21 1

6 -4 9 88 103 61 1 2 9 181 174 9 2 -6 10 131 126 14 2 0 10 253 245 10 3 -9 11 111 83 42

7 -4 9 75 21 75 2 2 9 392 384 9 3 -6 10 133 116 12 3 0 10 250 231 11 4 -9 11 0 21 1

8 -4 9 54 62 53 3 2 9 53 76 52 4 -6 10 87 81 49 4 0 10 120 98 16 0 -8 11 112 2 43

-6 -3 9 59 30 59 4 2 9 69 92 68 5 -6 10 138 139 14 5 0 10 105 80 66 1 -8 11 0 34 1

-5 -3 9 100 75 17 5 2 9 0 47 1 6 -6 10 92 94 42 6 0 10 89 74 37 2 -8 11 71 90 38

-4 -3 9 183 203 12 -8 3 9 75 68 75 7 -6 10 66 66 65 -8 1 10 86 100 85 3 -8 11 0 63 1

-3 -3 9 89 96 16 -7 3 9 143 151 14 -4 -5 10 122 100 16 -7 1 10 0 73 1 4 -8 11 68 13 68

-2 -3 9 173 166 9 -6 3 9 67 125 67 -3 -5 10 91 90 41 -6 1 10 105 89 41 5 -8 11 0 48 1

-1 -3 9 205 211 8 -5 3 9 145 156 9 -2 -5 10 60 76 60 -5 1 10 163 176 11 6 -8 11 56 94 56

0 -3 9 69 72 16 -4 3 9 216 228 8 -1 -5 10 75 125 74 -4 1 10 239 234 9 -2 -7 11 44 26 43

1 -3 9 123 112 9 -3 3 9 41 33 41 0 -5 10 33 129 32 -3 1 10 131 122 10 -1 -7 11 130 105 18

2 -3 9 253 267 7 -2 3 9 129 126 11 1 -5 10 32 86 31 -2 1 10 196 173 8 0 -7 11 86 51 50

3 -3 9 92 89 13 -1 3 9 0 44 1 2 -5 10 129 111 9 -1 1 10 341 325 7 1 -7 11 53 80 53

4 -3 9 54 83 53 0 3 9 178 180 10 3 -5 10 33 37 32 0 1 10 165 140 10 2 -7 11 199 206 12

5 -3 9 76 71 31 1 3 9 199 193 12 4 -5 10 299 294 10 1 1 10 130 132 11 3 -7 11 75 86 75

6 -3 9 66 66 31 2 3 9 166 164 12 5 -5 10 272 272 11 2 1 10 210 208 10 4 -7 11 0 14 1

Observed and calculated structure factors for **3H22+(CLO4)22-** Page 7

h k l 10Fo 10Fc 10s h k l 10Fo 10Fc 10s h k l 10Fo 10Fc 10s h k l 10Fo 10Fc 10s h k l 10Fo 10Fc 10s

5 -7 11 0 28 1 -1 0 11 220 200 8 4 -8 12 40 38 40 5 -1 12 0 35 1 5 -8 13 51 35 50

6 -7 11 130 129 17 0 0 11 49 39 49 5 -8 12 57 23 56 6 -1 12 0 35 1 -1 -7 13 60 56 59

7 -7 11 86 59 36 1 0 11 74 53 34 6 -8 12 0 46 1 -7 0 12 56 49 56 0 -7 13 0 88 1

-3 -6 11 0 83 1 2 0 11 73 85 73 -2 -7 12 0 21 1 -6 0 12 280 303 11 1 -7 13 111 88 15

-2 -6 11 39 53 38 3 0 11 0 66 1 -1 -7 12 83 88 82 -5 0 12 86 82 22 2 -7 13 39 116 39

-1 -6 11 64 98 63 4 0 11 67 60 67 0 -7 12 91 87 27 -4 0 12 96 111 42 3 -7 13 68 38 68

0 -6 11 107 125 42 5 0 11 69 79 69 1 -7 12 102 103 47 -3 0 12 102 106 13 4 -7 13 119 131 52

1 -6 11 58 45 28 6 0 11 77 104 77 2 -7 12 54 111 53 -2 0 12 267 296 9 5 -7 13 56 52 25

2 -6 11 86 91 49 -8 1 11 45 60 44 3 -7 12 118 117 15 -1 0 12 89 141 35 6 -7 13 0 17 1

3 -6 11 217 217 11 -7 1 11 51 42 51 4 -7 12 39 96 38 0 0 12 199 179 9 -3 -6 13 78 57 78

4 -6 11 169 177 14 -6 1 11 58 108 57 5 -7 12 68 53 67 1 0 12 264 272 9 -2 -6 13 0 70 1

5 -6 11 0 86 1 -5 1 11 139 140 11 6 -7 12 115 91 16 2 0 12 92 62 42 -1 -6 13 0 71 1

6 -6 11 94 82 66 -4 1 11 0 47 1 -3 -6 12 0 29 1 3 0 12 42 44 41 0 -6 13 118 100 16

7 -6 11 0 55 1 -3 1 11 0 46 1 -2 -6 12 69 96 68 4 0 12 220 190 13 1 -6 13 117 120 15

-4 -5 11 112 82 19 -2 1 11 81 119 53 -1 -6 12 0 43 1 5 0 12 0 61 1 2 -6 13 109 125 21

-3 -5 11 38 75 37 -1 1 11 50 57 50 0 -6 12 118 118 15 -8 1 12 0 66 1 3 -6 13 154 156 12

-2 -5 11 87 74 61 0 1 11 91 73 36 1 -6 12 37 99 36 -7 1 12 84 105 83 4 -6 13 55 85 54

-1 -5 11 48 47 48 1 1 11 191 191 12 2 -6 12 63 126 63 -6 1 12 0 32 1 5 -6 13 39 94 39

0 -5 11 130 147 14 2 1 11 101 130 29 3 -6 12 91 105 90 -5 1 12 198 195 10 6 -6 13 78 74 77

1 -5 11 42 68 42 3 1 11 97 58 20 4 -6 12 162 167 14 -4 1 12 54 29 53 -4 -5 13 0 41 1

2 -5 11 75 74 74 4 1 11 128 108 20 5 -6 12 86 74 69 -3 1 12 374 355 8 -3 -5 13 39 43 39

3 -5 11 277 261 10 5 1 11 72 50 33 6 -6 12 0 49 1 -2 1 12 246 240 8 -2 -5 13 83 69 35

4 -5 11 256 246 11 -8 2 11 84 18 83 7 -6 12 0 25 1 -1 1 12 25 5 25 -1 -5 13 89 89 40

5 -5 11 128 146 16 -7 2 11 86 95 49 -4 -5 12 0 35 1 0 1 12 148 168 11 0 -5 13 62 84 61

6 -5 11 124 133 17 -6 2 11 65 49 34 -3 -5 12 109 94 50 1 1 12 162 171 11 1 -5 13 71 91 71

7 -5 11 39 40 38 -5 2 11 131 137 11 -2 -5 12 160 148 14 2 1 12 95 80 18 2 -5 13 206 193 16

-5 -4 11 70 64 45 -4 2 11 112 109 12 -1 -5 12 47 44 46 3 1 12 79 64 78 3 -5 13 104 125 41

-4 -4 11 91 30 42 -3 2 11 211 191 9 0 -5 12 77 77 62 4 1 12 81 86 80 4 -5 13 63 65 34

-3 -4 11 122 112 17 -2 2 11 222 225 9 1 -5 12 144 147 13 5 1 12 49 5 49 5 -5 13 52 71 51

-2 -4 11 149 157 12 -1 2 11 69 39 69 2 -5 12 127 114 13 -8 2 12 77 85 76 6 -5 13 68 94 67

-1 -4 11 0 46 1 0 2 11 97 100 14 3 -5 12 141 162 13 -7 2 12 95 73 44 7 -5 13 0 43 1

0 -4 11 142 149 11 1 2 11 228 211 10 4 -5 12 90 39 41 -6 2 12 54 65 53 -5 -4 13 102 37 42

1 -4 11 54 34 25 2 2 11 183 170 15 5 -5 12 85 100 85 -5 2 12 31 55 30 -4 -4 13 55 66 55

2 -4 11 318 322 8 3 2 11 79 41 79 6 -5 12 39 75 38 -4 2 12 159 166 10 -3 -4 13 99 105 22

3 -4 11 177 168 11 4 2 11 0 58 1 7 -5 12 0 39 1 -3 2 12 190 195 10 -2 -4 13 95 68 14

4 -4 11 104 152 56 -8 3 11 80 41 80 -5 -4 12 115 83 36 -2 2 12 117 120 16 -1 -4 13 118 108 14

5 -4 11 58 16 32 -7 3 11 0 10 1 -4 -4 12 38 92 38 -1 2 12 142 142 12 0 -4 13 124 103 12

6 -4 11 0 29 1 -6 3 11 100 102 12 -3 -4 12 51 144 50 0 2 12 0 27 1 1 -4 13 113 158 47

7 -4 11 0 21 1 -5 3 11 156 151 11 -2 -4 12 161 166 12 1 2 12 81 96 65 2 -4 13 199 210 12

-6 -3 11 0 40 1 -4 3 11 0 20 1 -1 -4 12 130 104 13 2 2 12 137 167 17 3 -4 13 72 57 39

-5 -3 11 0 93 1 -3 3 11 76 85 19 0 -4 12 0 16 1 3 2 12 83 118 44 4 -4 13 0 36 1

-4 -3 11 0 39 1 -2 3 11 235 250 9 1 -4 12 194 216 11 4 2 12 68 64 68 5 -4 13 79 29 78

-3 -3 11 74 103 74 -1 3 11 82 85 57 2 -4 12 385 386 9 -8 3 12 73 24 73 6 -4 13 0 25 1

-2 -3 11 157 147 10 0 3 11 61 133 60 3 -4 12 257 244 11 -7 3 12 0 6 1 7 -4 13 0 23 1

-1 -3 11 105 96 15 1 3 11 156 153 13 4 -4 12 103 98 40 -6 3 12 31 49 31 -5 -3 13 97 29 44

0 -3 11 161 150 9 2 3 11 144 117 17 5 -4 12 108 163 56 -5 3 12 75 19 34 -4 -3 13 151 147 13

1 -3 11 74 84 15 3 3 11 0 20 1 6 -4 12 114 114 22 -4 3 12 82 44 31 -3 -3 13 60 93 59

2 -3 11 81 79 43 4 3 11 0 46 1 7 -4 12 86 19 36 -3 3 12 78 95 77 -2 -3 13 89 128 88

3 -3 11 170 179 10 -8 4 11 87 41 50 -6 -3 12 88 78 36 -2 3 12 104 104 15 -1 -3 13 90 123 19

4 -3 11 69 89 69 -7 4 11 33 61 32 -5 -3 12 102 71 39 -1 3 12 133 149 14 0 -3 13 318 329 9

5 -3 11 148 138 14 -6 4 11 54 69 54 -4 -3 12 103 91 21 0 3 12 204 209 11 1 -3 13 349 372 9

6 -3 11 131 124 20 -5 4 11 118 107 11 -3 -3 12 83 82 38 1 3 12 0 62 1 2 -3 13 83 86 47

7 -3 11 67 55 67 -4 4 11 91 63 36 -2 -3 12 128 109 16 2 3 12 79 84 79 3 -3 13 127 142 15

-6 -2 11 39 100 38 -3 4 11 46 53 46 -1 -3 12 164 161 10 3 3 12 68 102 68 4 -3 13 185 170 14

-5 -2 11 242 250 12 -2 4 11 148 170 14 0 -3 12 215 196 9 -8 4 12 0 29 1 5 -3 13 80 61 79

-4 -2 11 0 40 1 -1 4 11 94 78 60 1 -3 12 159 170 10 -7 4 12 83 65 58 6 -3 13 88 60 51

-3 -2 11 313 309 9 0 4 11 53 24 52 2 -3 12 183 194 10 -6 4 12 64 103 63 -6 -2 13 0 34 1

-2 -2 11 119 96 12 1 4 11 83 29 25 3 -3 12 134 136 14 -5 4 12 71 84 56 -5 -2 13 73 78 72

-1 -2 11 161 152 9 2 4 11 148 138 13 4 -3 12 104 113 60 -4 4 12 140 149 12 -4 -2 13 108 116 15

0 -2 11 187 177 8 3 4 11 67 17 67 5 -3 12 0 81 1 -3 4 12 88 89 48 -3 -2 13 93 91 15

1 -2 11 118 124 10 -8 5 11 89 34 89 6 -3 12 40 68 39 -2 4 12 110 102 56 -2 -2 13 154 142 11

2 -2 11 186 204 10 -7 5 11 49 48 49 7 -3 12 54 19 53 -1 4 12 36 28 36 -1 -2 13 80 78 17

3 -2 11 152 160 12 -6 5 11 0 19 1 -6 -2 12 0 64 1 0 4 12 123 108 15 0 -2 13 98 104 12

4 -2 11 0 46 1 -5 5 11 67 33 66 -5 -2 12 0 64 1 1 4 12 55 17 55 1 -2 13 271 275 10

5 -2 11 134 143 18 -4 5 11 146 145 15 -4 -2 12 166 164 12 2 4 12 78 36 77 2 -2 13 94 91 15

6 -2 11 104 111 40 -3 5 11 35 49 34 -3 -2 12 80 87 45 -7 5 12 140 118 13 3 -2 13 103 160 41

7 -2 11 0 23 1 -2 5 11 157 135 14 -2 -2 12 74 57 12 -6 5 12 59 93 59 4 -2 13 91 88 19

-7 -1 11 42 66 42 -1 5 11 136 144 14 -1 -2 12 81 91 14 -5 5 12 90 110 41 5 -2 13 0 78 1

-6 -1 11 62 67 28 0 5 11 87 54 50 0 -2 12 30 68 30 -4 5 12 151 131 12 6 -2 13 39 37 38

-5 -1 11 0 128 1 1 5 11 79 131 78 1 -2 12 106 145 48 -3 5 12 0 66 1 -7 -1 13 0 50 1

-4 -1 11 270 285 10 -7 6 11 56 94 55 2 -2 12 72 27 57 -2 5 12 36 107 36 -6 -1 13 110 128 19

-3 -1 11 0 45 1 -6 6 11 84 65 17 3 -2 12 69 83 69 -1 5 12 53 27 53 -5 -1 13 87 84 19

-2 -1 11 207 206 8 -5 6 11 0 17 1 4 -2 12 65 46 65 0 5 12 0 119 1 -4 -1 13 88 88 40

-1 -1 11 194 188 8 -4 6 11 89 103 88 5 -2 12 0 59 1 1 5 12 102 114 39 -3 -1 13 169 165 11

0 -1 11 236 231 7 -3 6 11 140 125 16 6 -2 12 0 42 1 -7 6 12 93 15 53 -2 -1 13 290 299 8

1 -1 11 0 29 1 -2 6 11 0 13 1 -7 -1 12 126 95 25 -6 6 12 54 49 53 -1 -1 13 76 66 34

2 -1 11 320 314 8 -1 6 11 0 42 1 -6 -1 12 64 73 63 -5 6 12 61 33 26 0 -1 13 179 197 11

3 -1 11 115 100 15 0 6 11 0 35 1 -5 -1 12 90 109 42 -4 6 12 63 40 63 1 -1 13 160 156 12

4 -1 11 52 103 52 -6 7 11 61 71 61 -4 -1 12 152 159 11 -3 6 12 148 144 12 2 -1 13 0 60 1

5 -1 11 111 98 44 -5 7 11 56 60 56 -3 -1 12 55 22 54 -2 6 12 0 73 1 3 -1 13 132 124 18

6 -1 11 91 88 23 -4 7 11 0 54 1 -2 -1 12 39 39 38 -1 6 12 106 101 16 4 -1 13 89 102 51

-7 0 11 94 38 53 -3 7 11 0 66 1 -1 -1 12 174 152 9 -4 7 12 40 20 40 5 -1 13 115 83 14

-6 0 11 34 63 34 -2 7 11 0 55 1 0 -1 12 0 35 1 0 -8 13 44 56 43 6 -1 13 0 35 1

-5 0 11 230 240 11 0 -8 12 43 35 43 1 -1 12 183 169 10 1 -8 13 73 29 72 -7 0 13 84 80 30

-4 0 11 0 99 1 1 -8 12 0 48 1 2 -1 12 139 125 12 2 -8 13 113 65 16 -6 0 13 162 152 12

-3 0 11 0 34 1 2 -8 12 119 87 27 3 -1 12 95 83 36 3 -8 13 41 52 40 -5 0 13 0 38 1

-2 0 11 208 192 8 3 -8 12 0 37 1 4 -1 12 173 173 14 4 -8 13 99 62 45 -4 0 13 85 60 54

Observed and calculated structure factors for **3H22+(CLO4)22-** Page 8

h k l 10Fo 10Fc 10s h k l 10Fo 10Fc 10s h k l 10Fo 10Fc 10s h k l 10Fo 10Fc 10s h k l 10Fo 10Fc 10s

-3 0 13 30 55 30 4 -6 14 100 113 20 -7 2 14 96 95 22 4 -3 15 71 51 71 3 -7 16 0 36 1

-2 0 13 138 127 17 5 -6 14 69 76 68 -6 2 14 34 72 34 5 -3 15 70 28 70 4 -7 16 88 61 70

-1 0 13 65 50 24 6 -6 14 55 67 54 -5 2 14 32 133 32 6 -3 15 83 95 34 -2 -6 16 78 71 77

0 0 13 31 45 30 -4 -5 14 47 83 47 -4 2 14 0 32 1 -6 -2 15 47 30 47 -1 -6 16 95 117 29

1 0 13 0 63 1 -3 -5 14 128 114 15 -3 2 14 0 48 1 -5 -2 15 0 41 1 0 -6 16 0 19 1

2 0 13 73 54 73 -2 -5 14 109 71 49 -2 2 14 90 79 42 -4 -2 15 138 136 16 1 -6 16 161 136 15

3 0 13 68 69 67 -1 -5 14 92 81 41 -1 2 14 0 48 1 -3 -2 15 79 91 33 2 -6 16 131 120 16

4 0 13 0 38 1 0 -5 14 0 105 1 0 2 14 152 171 16 -2 -2 15 144 125 14 3 -6 16 0 87 1

5 0 13 78 15 78 1 -5 14 181 162 12 1 2 14 68 120 67 -1 -2 15 275 270 10 4 -6 16 0 21 1

-7 1 13 38 31 38 2 -5 14 144 155 15 2 2 14 90 41 52 0 -2 15 154 148 11 5 -6 16 99 92 16

-6 1 13 97 82 38 3 -5 14 86 48 49 3 2 14 41 13 40 1 -2 15 95 75 13 -3 -5 16 0 29 1

-5 1 13 59 44 22 4 -5 14 97 122 44 -7 3 14 0 57 1 2 -2 15 155 169 15 -2 -5 16 0 47 1

-4 1 13 116 94 11 5 -5 14 35 14 34 -6 3 14 0 25 1 3 -2 15 70 104 70 -1 -5 16 69 93 68

-3 1 13 88 110 45 6 -5 14 39 13 38 -5 3 14 74 79 58 4 -2 15 42 30 41 0 -5 16 96 74 55

-2 1 13 0 30 1 -4 -4 14 57 30 57 -4 3 14 105 114 41 5 -2 15 40 9 40 1 -5 16 79 18 42

-1 1 13 184 188 10 -3 -4 14 119 112 19 -3 3 14 76 63 59 -6 -1 15 0 56 1 2 -5 16 116 94 14

0 1 13 210 220 11 -2 -4 14 0 57 1 -2 3 14 132 121 12 -5 -1 15 0 77 1 3 -5 16 99 131 70

1 1 13 36 20 35 -1 -4 14 88 75 61 -1 3 14 97 70 37 -4 -1 15 84 84 20 4 -5 16 81 56 81

2 1 13 124 141 19 0 -4 14 132 137 14 0 3 14 127 110 15 -3 -1 15 84 80 47 5 -5 16 39 81 39

3 1 13 90 84 52 1 -4 14 157 129 13 1 3 14 96 60 44 -2 -1 15 110 111 18 -4 -4 16 90 111 89

4 1 13 105 79 40 2 -4 14 208 201 11 2 3 14 87 57 86 -1 -1 15 217 239 11 -3 -4 16 0 44 1

-8 2 13 100 32 25 3 -4 14 197 197 13 -7 4 14 0 29 1 0 -1 15 0 49 1 -2 -4 16 0 15 1

-7 2 13 103 69 16 4 -4 14 160 150 12 -6 4 14 70 53 69 1 -1 15 132 149 15 -1 -4 16 86 81 23

-6 2 13 58 53 35 5 -4 14 90 47 38 -5 4 14 93 67 17 2 -1 15 0 141 1 0 -4 16 134 141 19

-5 2 13 0 23 1 6 -4 14 0 32 1 -4 4 14 152 157 13 3 -1 15 0 56 1 1 -4 16 101 96 17

-4 2 13 44 53 43 -5 -3 14 90 78 26 -3 4 14 47 76 46 4 -1 15 58 48 57 2 -4 16 0 91 1

-3 2 13 260 268 9 -4 -3 14 65 22 64 -2 4 14 174 177 11 5 -1 15 0 22 1 3 -4 16 91 62 38

-2 2 13 0 35 1 -3 -3 14 91 83 20 -1 4 14 76 61 75 -6 0 15 0 60 1 4 -4 16 101 77 46

-1 2 13 261 273 10 -2 -3 14 99 104 39 0 4 14 93 96 21 -5 0 15 0 14 1 5 -4 16 79 11 79

0 2 13 62 102 51 -1 -3 14 109 130 47 1 4 14 77 42 76 -4 0 15 103 82 14 -5 -3 16 0 26 1

1 2 13 134 140 15 0 -3 14 169 138 10 -6 5 14 65 81 65 -3 0 15 65 75 27 -4 -3 16 73 58 26

2 2 13 121 112 12 1 -3 14 0 61 1 -5 5 14 96 65 52 -2 0 15 68 94 67 -3 -3 16 142 108 13

3 2 13 79 64 42 2 -3 14 0 68 1 -4 5 14 109 101 43 -1 0 15 108 93 22 -2 -3 16 52 91 52

4 2 13 38 49 37 3 -3 14 0 24 1 -3 5 14 74 46 73 0 0 15 0 79 1 -1 -3 16 0 21 1

-8 3 13 0 55 1 4 -3 14 0 53 1 -2 5 14 0 59 1 1 0 15 0 110 1 0 -3 16 228 218 12

-7 3 13 104 106 17 5 -3 14 100 53 57 -1 5 14 38 75 38 2 0 15 107 124 58 1 -3 16 86 84 68

-6 3 13 200 205 10 6 -3 14 68 21 67 0 5 14 0 29 1 3 0 15 0 21 1 2 -3 16 69 56 69

-5 3 13 128 114 13 -6 -2 14 0 65 1 -5 6 14 57 30 56 4 0 15 0 26 1 3 -3 16 72 73 71

-4 3 13 170 172 12 -5 -2 14 54 55 53 -4 6 14 102 80 17 -7 1 15 0 9 1 4 -3 16 0 59 1

-3 3 13 126 127 12 -4 -2 14 117 121 17 -3 6 14 78 54 78 -6 1 15 0 38 1 5 -3 16 0 34 1

-2 3 13 72 65 28 -3 -2 14 60 32 59 2 -8 15 0 64 1 -5 1 15 68 51 68 -5 -2 16 0 57 1

-1 3 13 71 42 70 -2 -2 14 48 125 47 3 -8 15 92 78 72 -4 1 15 47 100 47 -4 -2 16 0 66 1

0 3 13 186 186 10 -1 -2 14 0 33 1 -1 -7 15 0 46 1 -3 1 15 34 39 33 -3 -2 16 0 90 1

1 3 13 0 13 1 0 -2 14 0 56 1 0 -7 15 0 87 1 -2 1 15 192 186 11 -2 -2 16 278 302 11

2 3 13 79 51 42 1 -2 14 60 51 60 1 -7 15 77 36 32 -1 1 15 211 205 11 -1 -2 16 145 130 12

3 3 13 0 17 1 2 -2 14 0 19 1 2 -7 15 58 20 57 0 1 15 75 108 41 0 -2 16 173 185 13

-7 4 13 0 53 1 3 -2 14 87 54 50 3 -7 15 81 55 81 1 1 15 76 71 22 1 -2 16 0 68 1

-6 4 13 57 57 57 4 -2 14 41 33 41 4 -7 15 0 62 1 2 1 15 170 163 16 2 -2 16 88 93 25

-5 4 13 80 56 45 5 -2 14 58 42 57 5 -7 15 100 54 19 3 1 15 0 33 1 3 -2 16 0 36 1

-4 4 13 94 104 48 6 -2 14 53 55 53 -2 -6 15 75 34 74 4 1 15 0 48 1 4 -2 16 85 42 29

-3 4 13 84 46 38 -6 -1 14 89 62 70 -1 -6 15 0 45 1 -7 2 15 73 71 72 5 -2 16 94 65 15

-2 4 13 273 268 10 -5 -1 14 88 48 40 0 -6 15 40 73 39 -6 2 15 0 30 1 -6 -1 16 104 82 29

-1 4 13 142 118 15 -4 -1 14 127 133 13 1 -6 15 99 95 20 -5 2 15 174 163 11 -5 -1 16 87 77 36

0 4 13 168 161 13 -3 -1 14 67 95 67 2 -6 15 56 67 56 -4 2 15 145 140 15 -4 -1 16 73 101 72

1 4 13 0 63 1 -2 -1 14 0 95 1 3 -6 15 0 70 1 -3 2 15 68 73 68 -3 -1 16 0 28 1

2 4 13 0 22 1 -1 -1 14 175 181 10 4 -6 15 80 82 43 -2 2 15 209 191 10 -2 -1 16 118 147 45

-7 5 13 55 42 24 0 -1 14 245 251 9 5 -6 15 68 42 68 -1 2 15 117 103 15 -1 -1 16 211 230 13

-6 5 13 71 41 38 1 -1 14 0 11 1 -3 -5 15 0 24 1 0 2 15 101 84 55 0 -1 16 92 79 65

-5 5 13 92 63 35 2 -1 14 0 38 1 -2 -5 15 110 111 25 1 2 15 97 53 44 1 -1 16 359 320 11

-4 5 13 99 93 18 3 -1 14 113 154 58 -1 -5 15 49 50 48 2 2 15 100 68 18 2 -1 16 83 42 44

-3 5 13 0 72 1 4 -1 14 96 49 20 0 -5 15 0 81 1 3 2 15 38 37 37 3 -1 16 59 39 59

-2 5 13 74 74 73 5 -1 14 57 21 56 1 -5 15 113 103 18 -7 3 15 91 120 33 4 -1 16 0 16 1

-1 5 13 0 59 1 -7 0 14 132 119 26 2 -5 15 103 86 39 -6 3 15 146 143 12 -6 0 16 0 14 1

0 5 13 54 38 54 -6 0 14 64 78 64 3 -5 15 0 30 1 -5 3 15 109 115 19 -5 0 16 83 106 66

-6 6 13 0 41 1 -5 0 14 0 61 1 4 -5 15 0 52 1 -4 3 15 107 102 15 -4 0 16 139 145 15

-5 6 13 121 92 17 -4 0 14 154 157 11 5 -5 15 0 38 1 -3 3 15 92 98 42 -3 0 16 0 71 1

-4 6 13 0 27 1 -3 0 14 199 210 10 6 -5 15 0 37 1 -2 3 15 41 70 40 -2 0 16 214 222 12

-3 6 13 66 26 65 -2 0 14 87 32 46 -4 -4 15 120 115 47 -1 3 15 95 101 18 -1 0 16 111 110 43

-2 6 13 0 52 1 -1 0 14 371 377 9 -3 -4 15 38 50 38 0 3 15 87 80 69 0 0 16 109 124 50

1 -8 14 95 68 55 0 0 14 237 245 11 -2 -4 15 37 116 37 1 3 15 140 115 13 1 0 16 287 272 12

2 -8 14 0 24 1 1 0 14 160 180 14 -1 -4 15 193 203 13 2 3 15 106 116 19 2 0 16 0 83 1

3 -8 14 0 39 1 2 0 14 176 182 13 0 -4 15 64 25 63 -6 4 15 0 38 1 3 0 16 0 56 1

4 -8 14 57 21 57 3 0 14 110 72 15 1 -4 15 211 200 11 -5 4 15 79 21 33 4 0 16 54 59 53

-1 -7 14 44 53 43 4 0 14 0 69 1 2 -4 15 121 124 47 -4 4 15 0 57 1 -6 1 16 92 66 22

0 -7 14 71 45 36 5 0 14 0 71 1 3 -4 15 107 128 26 -3 4 15 0 41 1 -5 1 16 72 28 38

1 -7 14 0 35 1 -7 1 14 109 111 59 4 -4 15 91 26 17 -2 4 15 74 54 74 -4 1 16 135 126 16

2 -7 14 0 76 1 -6 1 14 50 57 50 5 -4 15 40 35 40 -1 4 15 0 64 1 -3 1 16 50 80 49

3 -7 14 57 70 56 -5 1 14 88 101 48 6 -4 15 76 56 40 0 4 15 86 50 67 -2 1 16 62 73 34

4 -7 14 106 96 15 -4 1 14 150 136 10 -5 -3 15 158 128 17 -6 5 15 81 84 81 -1 1 16 95 64 17

5 -7 14 40 50 39 -3 1 14 194 190 11 -4 -3 15 89 95 31 -5 5 15 0 39 1 0 1 16 0 37 1

6 -7 14 0 53 1 -2 1 14 0 22 1 -3 -3 15 0 72 1 -4 5 15 0 85 1 1 1 16 108 126 58

-2 -6 14 62 43 45 -1 1 14 246 218 10 -2 -3 15 150 134 14 -3 5 15 0 54 1 2 1 16 82 52 81

-1 -6 14 89 69 20 0 1 14 0 92 1 -1 -3 15 50 27 50 -2 5 15 54 44 53 3 1 16 39 82 38

0 -6 14 138 121 16 1 1 14 0 19 1 0 -3 15 259 255 10 -1 5 15 0 23 1 -6 2 16 0 51 1

1 -6 14 86 61 68 2 1 14 56 85 56 1 -3 15 0 64 1 0 -7 16 0 2 1 -5 2 16 0 45 1

2 -6 14 87 115 68 3 1 14 41 79 40 2 -3 15 93 103 65 1 -7 16 109 80 21 -4 2 16 93 43 35

3 -6 14 78 35 78 4 1 14 0 122 1 3 -3 15 98 35 55 2 -7 16 41 50 40 -3 2 16 0 65 1

Observed and calculated structure factors for **3H22+(CLO4)22-** Page 9

h k l 10Fo 10Fc 10s h k l 10Fo 10Fc 10s h k l 10Fo 10Fc 10s h k l 10Fo 10Fc 10s h k l 10Fo 10Fc 10s

-2 2 16 97 95 15 5 -3 17 84 59 35 -3 4 17 54 42 54 -5 1 18 40 27 39 -1 0 19 179 151 13

-1 2 16 0 60 1 -5 -2 17 100 106 51 -2 4 17 86 74 36 -4 1 18 68 37 23 0 0 19 107 67 41

0 2 16 155 125 13 -4 -2 17 88 63 70 0 -6 18 0 25 1 -3 1 18 65 12 65 1 0 19 74 79 25

1 2 16 35 79 34 -3 -2 17 0 67 1 1 -6 18 78 83 40 -2 1 18 101 82 55 2 0 19 38 50 38

2 2 16 78 42 78 -2 -2 17 202 199 12 2 -6 18 81 50 81 -1 1 18 0 75 1 -5 1 19 0 101 1

-6 3 16 86 63 69 -1 -2 17 38 40 37 3 -6 18 0 39 1 0 1 18 0 69 1 -4 1 19 99 68 17

-5 3 16 85 66 19 0 -2 17 0 105 1 -2 -5 18 0 51 1 1 1 18 40 27 39 -3 1 19 55 76 54

-4 3 16 0 3 1 1 -2 17 81 16 43 -1 -5 18 76 62 30 2 1 18 0 51 1 -2 1 19 109 130 19

-3 3 16 147 136 13 2 -2 17 72 79 72 0 -5 18 71 13 71 -5 2 18 59 22 34 -1 1 19 127 128 22

-2 3 16 124 96 14 3 -2 17 0 59 1 1 -5 18 108 101 69 -4 2 18 66 75 65 0 1 19 0 72 1

-1 3 16 86 87 50 4 -2 17 40 20 40 2 -5 18 0 55 1 -3 2 18 66 12 65 1 1 19 66 77 66

0 3 16 39 68 38 -5 -1 17 0 44 1 3 -5 18 0 63 1 -2 2 18 86 64 36 -4 2 19 0 78 1

1 3 16 54 28 54 -4 -1 17 98 94 20 4 -5 18 0 24 1 -1 2 18 0 74 1 -3 2 19 147 125 14

-6 4 16 163 129 16 -3 -1 17 74 44 73 -3 -4 18 0 35 1 0 2 18 55 64 55 -2 2 19 87 71 36

-5 4 16 76 16 75 -2 -1 17 52 43 52 -2 -4 18 58 52 58 1 2 18 0 44 1 -1 2 19 0 70 1

-4 4 16 0 59 1 -1 -1 17 0 74 1 -1 -4 18 40 51 40 -5 3 18 147 121 18 0 2 19 0 40 1

-3 4 16 53 59 53 0 -1 17 0 32 1 0 -4 18 67 80 31 -4 3 18 95 99 54 1 -5 20 86 102 22

-2 4 16 66 56 66 1 -1 17 58 77 58 1 -4 18 0 49 1 -3 3 18 0 66 1 -1 -4 20 58 39 58

-1 4 16 39 12 38 2 -1 17 73 24 72 2 -4 18 71 35 71 -2 3 18 67 92 66 0 -4 20 0 41 1

0 4 16 38 37 38 3 -1 17 110 19 42 3 -4 18 82 49 44 -1 3 18 23 70 23 1 -4 20 0 59 1

-4 5 16 0 53 1 4 -1 17 54 24 54 4 -4 18 55 50 55 -1 -5 19 143 141 16 2 -4 20 0 37 1

-3 5 16 68 58 67 -6 0 17 45 47 44 -4 -3 18 119 83 55 0 -5 19 0 57 1 -2 -3 20 115 109 19

1 -7 17 0 83 1 -5 0 17 0 10 1 -3 -3 18 71 78 34 1 -5 19 0 21 1 -1 -3 20 76 57 27

2 -7 17 0 86 1 -4 0 17 87 55 16 -2 -3 18 0 51 1 2 -5 19 56 76 56 0 -3 20 70 17 69

3 -7 17 0 33 1 -3 0 17 96 101 36 -1 -3 18 104 139 56 3 -5 19 55 62 25 1 -3 20 70 24 69

-1 -6 17 51 19 50 -2 0 17 93 88 19 0 -3 18 89 70 72 -2 -4 19 0 28 1 2 -3 20 39 37 39

0 -6 17 84 51 23 -1 0 17 54 57 54 1 -3 18 91 90 53 -1 -4 19 0 42 1 -3 -2 20 42 47 41

1 -6 17 71 56 71 0 0 17 80 95 79 2 -3 18 42 20 41 0 -4 19 123 74 16 -2 -2 20 40 53 40

2 -6 17 108 59 50 1 0 17 83 88 82 3 -3 18 0 39 1 1 -4 19 0 74 1 -1 -2 20 122 103 20

3 -6 17 99 101 56 2 0 17 0 23 1 4 -3 18 0 34 1 2 -4 19 0 32 1 0 -2 20 107 82 49

4 -6 17 0 34 1 3 0 17 107 92 18 -4 -2 18 0 62 1 3 -4 19 39 81 39 1 -2 20 0 59 1

-2 -5 17 0 76 1 -6 1 17 94 74 75 -3 -2 18 0 48 1 -3 -3 19 86 57 25 2 -2 20 0 49 1

-1 -5 17 82 21 81 -5 1 17 65 45 64 -2 -2 18 39 25 38 -2 -3 19 0 38 1 -3 -1 20 0 29 1

0 -5 17 166 156 14 -4 1 17 51 22 51 -1 -2 18 0 58 1 -1 -3 19 57 51 56 -2 -1 20 40 80 39

1 -5 17 0 31 1 -3 1 17 213 224 12 0 -2 18 123 118 15 0 -3 19 70 72 70 -1 -1 20 0 11 1

2 -5 17 91 41 38 -2 1 17 214 208 12 1 -2 18 0 22 1 1 -3 19 0 34 1 0 -1 20 90 97 52

3 -5 17 71 57 70 -1 1 17 237 241 12 2 -2 18 0 13 1 2 -3 19 0 16 1 1 -1 20 97 95 96

4 -5 17 0 55 1 0 1 17 182 192 14 3 -2 18 71 63 70 3 -3 19 0 49 1 -4 0 20 73 40 72

5 -5 17 69 105 31 1 1 17 91 58 38 4 -2 18 0 28 1 -4 -2 19 97 67 56 -3 0 20 0 48 1

-3 -4 17 108 86 26 2 1 17 105 19 40 -5 -1 18 97 29 56 -3 -2 19 70 25 69 -2 0 20 56 44 56

-2 -4 17 118 118 16 -6 2 17 0 93 1 -4 -1 18 39 92 39 -2 -2 19 112 85 58 -1 0 20 40 7 39

-1 -4 17 0 18 1 -5 2 17 84 26 35 -3 -1 18 93 135 65 -1 -2 19 99 81 19 0 0 20 0 69 1

0 -4 17 158 165 15 -4 2 17 63 3 63 -2 -1 18 93 115 23 0 -2 19 81 95 80 1 0 20 0 8 1

1 -4 17 0 88 1 -3 2 17 158 155 14 -1 -1 18 55 56 25 1 -2 19 82 55 44 -3 1 20 69 52 69

2 -4 17 74 30 25 -2 2 17 93 42 42 0 -1 18 221 195 13 2 -2 19 58 36 57 -2 1 20 110 109 23

3 -4 17 0 37 1 -1 2 17 95 29 43 1 -1 18 93 44 54 3 -2 19 0 25 1 -1 1 20 68 35 67

4 -4 17 71 36 70 0 2 17 39 90 39 2 -1 18 0 28 1 -4 -1 19 0 43 1 0 1 20 85 4 49

5 -4 17 0 60 1 1 2 17 68 59 67 3 -1 18 81 93 40 -3 -1 19 0 11 1 -1 -3 21 57 54 57

-4 -3 17 0 23 1 -6 3 17 0 39 1 -5 0 18 93 23 21 -2 -1 19 55 83 55 0 -3 21 79 37 79

-3 -3 17 0 82 1 -5 3 17 0 21 1 -4 0 18 76 29 75 -1 -1 19 105 74 40 -2 -2 21 58 10 57

-2 -3 17 67 112 66 -4 3 17 0 11 1 -3 0 18 147 149 11 0 -1 19 0 38 1 -1 -2 21 0 41 1

-1 -3 17 124 103 17 -3 3 17 53 26 24 -2 0 18 0 64 1 1 -1 19 0 40 1 0 -2 21 0 33 1

0 -3 17 95 78 67 -2 3 17 0 68 1 -1 0 18 276 251 11 2 -1 19 0 49 1 -2 -1 21 0 59 1

1 -3 17 186 193 14 -1 3 17 0 42 1 0 0 18 99 107 45 -5 0 19 46 41 45 -1 -1 21 0 25 1

2 -3 17 41 132 41 0 3 17 65 36 20 1 0 18 82 59 82 -4 0 19 105 84 40 0 -1 21 0 31 1

3 -3 17 0 86 1 -5 4 17 90 22 52 2 0 18 0 24 1 -3 0 19 77 68 77 -2 0 21 40 88 39

4 -3 17 0 7 1 -4 4 17 0 66 1 3 0 18 0 57 1 -2 0 19 0 86 1 -1 0 21 0 14 1
