# Supplementary material for: Structural studies of two protonated forms of a C2 symmetrical optically active cyclam derivative
Source: Royal Society of Chemistry journal article supplement (doi:10.1039/a904998c), 2000-01-01
Supplement: a904998csf2.doc [file a904998csf2.doc]

# Supplementary data

**Structural studies of two protonated forms of a *C2* symmetrical optically active cyclam derivative**

**Ignacio Alfonso, Covadonga Astorga, Francisca Rebolledo,* Vicente Gotor,* Santiago García-Granda and Ana Tesouro**

*Departamento de Química Orgánica e Inorgánica, Universidad de Oviedo,. 33071 Oviedo, Spain*

*Departamento de Química Física y Analítica, Universidad de Oviedo, 33071 Oviedo, Spain*

Observed and calculated structure factors for **3H44+Br44-** Page 1

h k l 10Fo 10Fc 10s h k l 10Fo 10Fc 10s h k l 10Fo 10Fc 10s h k l 10Fo 10Fc 10s h k l 10Fo 10Fc 10s

1 -1 0 133 98 5 3 9 0 602 609 6 -8 1 1 108 158 107 -6 6 1 0 124 1 4 11 1 503 477 14

2 -1 0 1361 1350 13 4 9 0 219 239 46 -7 1 1 277 252 21 -5 6 1 326 319 12 5 11 1 102 219 102

3 -1 0 999 976 9 5 9 0 601 548 17 -6 1 1 550 518 12 -4 6 1 604 598 9 6 11 1 151 134 79

4 -1 0 285 287 9 6 9 0 0 42 1 -5 1 1 201 197 17 -3 6 1 62 44 61 -6 12 1 114 125 40

5 -1 0 734 728 9 7 9 0 87 157 87 -4 1 1 883 884 13 -2 6 1 744 741 11 -5 12 1 0 54 1

6 -1 0 297 287 13 0 10 0 852 810 12 -3 1 1 446 438 7 -1 6 1 1404 1443 12 -4 12 1 293 268 19

7 -1 0 302 269 24 1 10 0 148 171 38 -2 1 1 1112 1108 10 0 6 1 242 248 8 -3 12 1 256 225 18

8 -1 0 130 195 106 2 10 0 469 483 7 -1 1 1 235 233 5 1 6 1 356 357 7 -2 12 1 150 161 93

9 -1 0 84 73 83 3 10 0 417 397 9 0 1 1 311 323 5 2 6 1 409 401 8 -1 12 1 528 484 12

1 0 0 26 92 25 4 10 0 34 125 33 1 1 1 733 719 9 3 6 1 343 352 10 0 12 1 284 239 16

2 0 0 277 263 6 5 10 0 220 240 28 2 1 1 614 599 9 4 6 1 504 519 10 1 12 1 419 411 14

3 0 0 239 235 9 6 10 0 267 254 14 3 1 1 504 496 10 5 6 1 114 112 114 2 12 1 539 498 13

4 0 0 93 57 92 7 10 0 0 86 1 4 1 1 619 640 11 6 6 1 104 40 103 3 12 1 0 115 1

5 0 0 227 211 33 1 11 0 341 333 9 5 1 1 404 402 13 7 6 1 324 367 23 4 12 1 222 213 23

6 0 0 0 97 1 2 11 0 504 508 8 6 1 1 464 498 17 8 6 1 0 93 1 5 12 1 0 73 1

7 0 0 161 36 62 3 11 0 389 369 12 7 1 1 120 128 119 -8 7 1 0 85 1 6 12 1 0 67 1

8 0 0 393 374 15 4 11 0 0 19 1 8 1 1 0 76 1 -7 7 1 212 194 21 -6 13 1 0 108 1

9 0 0 0 82 1 5 11 0 97 40 97 -9 2 1 231 229 24 -6 7 1 436 430 13 -5 13 1 41 101 41

1 1 0 131 114 5 6 11 0 275 297 13 -8 2 1 163 135 88 -5 7 1 107 111 106 -4 13 1 325 312 20

2 1 0 1366 1354 62 7 11 0 87 149 87 -7 2 1 0 90 1 -4 7 1 640 629 9 -3 13 1 272 244 18

3 1 0 975 979 31 0 12 0 726 690 11 -6 2 1 0 98 1 -3 7 1 194 192 13 -2 13 1 425 393 14

4 1 0 275 280 30 1 12 0 327 325 15 -5 2 1 72 123 71 -2 7 1 214 208 12 -1 13 1 70 115 69

5 1 0 721 720 7 2 12 0 202 190 18 -4 2 1 858 847 11 -1 7 1 405 424 7 0 13 1 140 87 111

6 1 0 288 291 13 3 12 0 300 283 13 -3 2 1 113 99 44 0 7 1 237 213 10 1 13 1 360 346 16

7 1 0 269 267 16 4 12 0 243 202 39 -2 2 1 1234 1206 10 1 7 1 326 322 8 2 13 1 118 86 118

8 1 0 191 204 55 5 12 0 0 125 1 -1 2 1 1024 974 8 2 7 1 804 827 11 3 13 1 230 201 22

9 1 0 90 71 89 6 12 0 0 67 1 0 2 1 588 588 8 3 7 1 274 281 12 4 13 1 0 174 1

0 2 0 399 357 6 1 13 0 125 84 86 1 2 1 734 766 10 4 7 1 679 684 9 5 13 1 214 251 27

1 2 0 295 283 4 2 13 0 170 166 20 2 2 1 176 177 13 5 7 1 148 179 42 6 13 1 110 170 110

2 2 0 1264 1213 35 3 13 0 466 448 11 3 2 1 234 229 12 6 7 1 268 290 21 -5 14 1 116 168 115

3 2 0 954 960 29 4 13 0 0 49 1 4 2 1 549 560 11 7 7 1 168 145 34 -4 14 1 294 267 19

4 2 0 129 121 30 5 13 0 312 323 11 5 2 1 113 33 113 8 7 1 0 75 1 -3 14 1 0 64 1

5 2 0 467 475 8 6 13 0 87 85 86 6 2 1 154 110 102 -8 8 1 0 57 1 -2 14 1 202 228 74

6 2 0 449 438 10 0 14 0 603 555 14 7 2 1 338 366 22 -7 8 1 299 282 18 -1 14 1 383 401 17

7 2 0 0 46 1 1 14 0 56 55 56 8 2 1 133 79 58 -6 8 1 269 269 19 0 14 1 271 285 22

8 2 0 89 31 88 2 14 0 272 261 16 -9 3 1 0 185 1 -5 8 1 211 217 20 1 14 1 394 340 17

9 2 0 0 120 1 3 14 0 135 128 84 -8 3 1 58 130 58 -4 8 1 569 555 10 2 14 1 181 147 31

1 3 0 197 163 18 4 14 0 0 135 1 -7 3 1 129 126 33 -3 8 1 349 335 11 3 14 1 262 247 21

2 3 0 990 977 20 5 14 0 125 169 26 -6 3 1 488 478 12 -2 8 1 98 144 98 4 14 1 79 147 78

3 3 0 501 522 12 1 15 0 257 239 26 -5 3 1 203 194 15 -1 8 1 447 469 9 5 14 1 131 69 76

4 3 0 283 273 10 2 15 0 237 293 51 -4 3 1 585 591 8 0 8 1 371 372 8 -5 15 1 136 134 136

5 3 0 571 600 15 3 15 0 264 266 23 -3 3 1 318 327 8 1 8 1 932 968 13 -4 15 1 206 190 24

6 3 0 335 331 12 4 15 0 0 83 1 -2 3 1 588 567 8 2 8 1 792 809 11 -3 15 1 0 106 1

7 3 0 293 287 16 5 15 0 106 98 44 -1 3 1 633 673 8 3 8 1 232 217 14 -2 15 1 206 203 26

8 3 0 228 267 18 0 16 0 221 220 25 0 3 1 231 225 6 4 8 1 404 409 13 -1 15 1 95 178 95

0 4 0 2541 2657 10 1 16 0 244 256 24 1 3 1 647 645 10 5 8 1 127 146 33 0 15 1 0 102 1

1 4 0 646 635 7 2 16 0 108 145 108 2 3 1 627 644 8 6 8 1 0 74 1 1 15 1 0 89 1

2 4 0 0 33 1 3 16 0 50 208 49 3 3 1 396 413 9 7 8 1 109 155 109 2 15 1 321 328 17

3 4 0 332 329 12 4 16 0 102 150 47 4 3 1 881 912 14 -8 9 1 168 76 66 3 15 1 68 102 68

4 4 0 197 169 13 1 17 0 147 112 42 5 3 1 176 210 65 -7 9 1 211 204 22 4 15 1 206 260 21

5 4 0 376 361 9 2 17 0 78 79 77 6 3 1 443 467 16 -6 9 1 120 112 120 -4 16 1 114 114 51

6 4 0 0 64 1 3 17 0 133 208 50 7 3 1 197 209 81 -5 9 1 257 224 18 -3 16 1 113 197 112

7 4 0 0 46 1 0 18 0 251 311 16 8 3 1 84 47 83 -4 9 1 507 482 11 -2 16 1 0 72 1

8 4 0 296 303 17 -9 -1 1 0 204 1 -9 4 1 144 37 80 -3 9 1 603 588 9 -1 16 1 193 362 90

1 5 0 191 204 7 -8 -1 1 0 156 1 -8 4 1 99 43 99 -2 9 1 734 717 11 0 16 1 159 100 80

2 5 0 552 551 5 -7 -1 1 240 252 26 -7 4 1 447 434 14 -1 9 1 0 83 1 1 16 1 134 185 134

3 5 0 800 818 26 -6 -1 1 513 509 14 -6 4 1 310 306 16 0 9 1 305 303 11 2 16 1 0 169 1

4 5 0 262 244 9 -5 -1 1 200 186 19 -5 4 1 132 53 49 1 9 1 634 653 9 3 16 1 0 87 1

5 5 0 649 644 21 -4 -1 1 850 869 13 -4 4 1 854 813 13 2 9 1 56 187 56 -3 17 1 0 146 1

6 5 0 149 151 61 -3 -1 1 425 430 7 -3 4 1 336 353 8 3 9 1 415 397 12 -2 17 1 186 208 25

7 5 0 259 262 33 -2 -1 1 1127 1113 10 -2 4 1 332 310 6 4 9 1 364 347 14 -1 17 1 115 43 114

8 5 0 150 146 25 -1 -1 1 241 218 6 -1 4 1 386 385 5 5 9 1 280 268 22 0 17 1 152 34 65

0 6 0 960 947 13 0 -1 1 343 327 4 0 4 1 480 476 7 6 9 1 331 322 21 1 17 1 83 175 82

1 6 0 306 296 9 1 -1 1 736 699 9 1 4 1 1826 1860 11 7 9 1 0 129 1 2 17 1 78 173 77

2 6 0 559 573 5 2 -1 1 628 594 9 2 4 1 1127 1138 13 -7 10 1 135 142 135 -9 -1 2 0 66 1

3 6 0 714 713 17 3 -1 1 519 507 10 3 4 1 132 179 57 -6 10 1 0 49 1 -8 -1 2 124 127 124

4 6 0 168 137 34 4 -1 1 661 647 10 4 4 1 527 545 10 -5 10 1 278 289 18 -7 -1 2 319 324 22

5 6 0 375 381 9 5 -1 1 362 386 15 5 4 1 184 179 21 -4 10 1 459 456 12 -6 -1 2 322 315 17

6 6 0 260 236 24 6 -1 1 508 482 15 6 4 1 0 176 1 -3 10 1 119 84 118 -5 -1 2 457 476 9

7 6 0 124 113 29 7 -1 1 0 138 1 7 4 1 168 194 85 -2 10 1 414 394 11 -4 -1 2 462 482 10

8 6 0 132 140 36 8 -1 1 141 63 140 8 4 1 153 235 153 -1 10 1 839 838 12 -3 -1 2 308 306 9

1 7 0 194 198 9 -9 0 1 136 3 135 -8 5 1 156 112 85 0 10 1 345 350 11 -2 -1 2 1089 1050 13

2 7 0 662 683 7 -8 0 1 81 46 81 -7 5 1 148 152 101 1 10 1 457 453 10 -1 -1 2 566 538 8

3 7 0 477 486 8 -7 0 1 524 475 16 -6 5 1 297 249 15 2 10 1 224 219 16 0 -1 2 254 252 8

4 7 0 56 105 56 -6 0 1 510 502 13 -5 5 1 68 147 67 3 10 1 259 215 17 1 -1 2 661 677 10

5 7 0 266 257 11 -5 0 1 165 131 60 -4 5 1 727 717 11 4 10 1 334 307 20 2 -1 2 940 923 14

6 7 0 465 428 11 -4 0 1 1338 1329 16 -3 5 1 651 650 9 5 10 1 145 118 83 3 -1 2 669 652 10

7 7 0 161 185 51 -3 0 1 0 93 1 -2 5 1 1169 1150 12 6 10 1 0 69 1 4 -1 2 427 412 13

8 7 0 89 135 89 -2 0 1 0 46 1 -1 5 1 275 275 7 7 10 1 0 157 1 5 -1 2 604 598 13

0 8 0 1357 1396 14 -1 0 1 406 350 5 0 5 1 177 174 10 -7 11 1 0 99 1 6 -1 2 274 266 23

1 8 0 705 703 7 0 0 1 199 147 5 1 5 1 675 682 10 -6 11 1 343 350 17 7 -1 2 309 268 26

2 8 0 215 204 8 1 0 1 1128 1084 11 2 5 1 291 278 9 -5 11 1 222 192 30 8 -1 2 256 245 37

3 8 0 323 321 8 2 0 1 1579 1539 14 3 5 1 570 583 8 -4 11 1 374 360 17 -9 0 2 0 88 1

4 8 0 220 213 46 3 0 1 235 221 14 4 5 1 498 526 12 -3 11 1 107 79 56 -8 0 2 0 70 1

5 8 0 158 175 42 4 0 1 539 531 11 5 5 1 475 475 13 -2 11 1 114 124 114 -7 0 2 57 74 56

6 8 0 135 187 83 5 0 1 131 147 28 6 5 1 571 558 15 -1 11 1 242 224 16 -6 0 2 326 330 13

7 8 0 62 70 62 6 0 1 180 82 78 7 5 1 169 119 84 0 11 1 0 101 1 -5 0 2 431 422 8

8 8 0 149 213 66 7 0 1 119 76 119 8 5 1 0 93 1 1 11 1 0 121 1 -4 0 2 154 142 13

1 9 0 194 199 11 8 0 1 202 226 84 -8 6 1 106 120 106 2 11 1 558 538 12 -3 0 2 851 857 12

2 9 0 236 233 13 -9 1 1 179 201 27 -7 6 1 132 113 131 3 11 1 198 183 23 -2 0 2 2065 2065 12

Observed and calculated structure factors for **3H44+Br44-** Page 2

h k l 10Fo 10Fc 10s h k l 10Fo 10Fc 10s h k l 10Fo 10Fc 10s h k l 10Fo 10Fc 10s h k l 10Fo 10Fc 10s

-1 0 2 170 116 9 -1 5 2 395 391 6 -5 11 2 349 327 16 8 -1 3 84 24 84 -8 5 3 52 135 52

0 0 2 248 265 7 0 5 2 489 498 7 -4 11 2 0 193 1 -9 0 3 308 357 14 -7 5 3 0 106 1

1 0 2 363 353 8 1 5 2 750 768 11 -3 11 2 559 536 11 -8 0 3 0 32 1 -6 5 3 543 519 11

2 0 2 421 391 9 2 5 2 921 941 14 -2 11 2 0 57 1 -7 0 3 122 83 122 -5 5 3 57 43 57

3 0 2 934 902 13 3 5 2 604 621 10 -1 11 2 209 197 17 -6 0 3 204 216 17 -4 5 3 770 774 10

4 0 2 287 292 21 4 5 2 322 342 15 0 11 2 0 116 1 -5 0 3 58 20 57 -3 5 3 250 252 10

5 0 2 353 311 18 5 5 2 351 347 17 1 11 2 351 343 12 -4 0 3 721 747 10 -2 5 3 456 455 7

6 0 2 378 368 18 6 5 2 155 195 154 2 11 2 260 234 19 -3 0 3 48 30 48 -1 5 3 178 183 12

7 0 2 87 52 87 7 5 2 186 153 40 3 11 2 344 343 17 -2 0 3 656 643 10 0 5 3 112 99 18

8 0 2 0 98 1 8 5 2 0 218 1 4 11 2 313 294 18 -1 0 3 2317 2445 12 1 5 3 547 546 9

-9 1 2 104 66 104 -8 6 2 405 421 13 5 11 2 352 335 17 0 0 3 298 295 8 2 5 3 609 603 9

-8 1 2 0 118 1 -7 6 2 0 142 1 6 11 2 70 107 69 1 0 3 99 25 99 3 5 3 407 415 12

-7 1 2 363 340 14 -6 6 2 0 63 1 -7 12 2 0 11 1 2 0 3 0 144 1 4 5 3 695 694 12

-6 1 2 332 318 12 -5 6 2 369 367 11 -6 12 2 70 95 69 3 0 3 361 360 13 5 5 3 182 217 36

-5 1 2 455 457 9 -4 6 2 339 311 10 -5 12 2 243 236 26 4 0 3 81 202 81 6 5 3 323 285 25

-4 1 2 499 490 8 -3 6 2 332 325 8 -4 12 2 167 152 80 5 0 3 308 296 21 7 5 3 72 112 71

-3 1 2 339 331 7 -2 6 2 303 331 9 -3 12 2 338 302 15 6 0 3 241 220 25 -8 6 3 76 66 75

-2 1 2 1075 1080 12 -1 6 2 347 347 8 -2 12 2 392 371 14 7 0 3 150 217 150 -7 6 3 137 214 136

-1 1 2 582 579 8 0 6 2 1351 1409 13 -1 12 2 274 291 17 8 0 3 145 31 144 -6 6 3 517 507 12

0 1 2 336 310 6 1 6 2 738 761 11 0 12 2 508 478 12 -9 1 3 132 109 72 -5 6 3 227 202 16

1 1 2 655 680 10 2 6 2 198 194 16 1 12 2 399 412 14 -8 1 3 159 163 26 -4 6 3 661 639 10

2 1 2 930 908 13 3 6 2 275 280 13 2 12 2 267 270 22 -7 1 3 64 158 63 -3 6 3 594 595 8

3 1 2 643 659 9 4 6 2 227 246 21 3 12 2 127 220 126 -6 1 3 523 530 10 -2 6 3 0 34 1

4 1 2 446 429 12 5 6 2 0 86 1 4 12 2 183 162 28 -5 1 3 147 163 16 -1 6 3 534 540 8

5 1 2 567 579 13 6 6 2 118 105 117 5 12 2 155 114 83 -4 1 3 817 813 12 0 6 3 435 436 8

6 1 2 275 279 27 7 6 2 236 228 27 6 12 2 155 133 62 -3 1 3 404 432 8 1 6 3 558 562 9

7 1 2 248 263 32 -8 7 2 66 106 65 -6 13 2 229 231 27 -2 1 3 805 809 11 2 6 3 759 749 11

8 1 2 268 251 32 -7 7 2 129 199 128 -5 13 2 200 218 23 -1 1 3 320 307 7 3 6 3 208 186 25

-9 2 2 72 34 71 -6 7 2 0 143 1 -4 13 2 0 47 1 0 1 3 245 254 10 4 6 3 176 182 25

-8 2 2 466 443 13 -5 7 2 558 542 10 -3 13 2 179 49 68 1 1 3 1149 1137 15 5 6 3 101 121 101

-7 2 2 204 182 22 -4 7 2 161 155 20 -2 13 2 519 509 14 2 1 3 655 648 10 6 6 3 0 117 1

-6 2 2 109 101 108 -3 7 2 617 589 10 -1 13 2 209 213 22 3 1 3 509 502 11 7 6 3 156 154 156

-5 2 2 398 401 10 -2 7 2 280 272 10 0 13 2 115 139 115 4 1 3 732 736 11 -8 7 3 0 83 1

-4 2 2 211 215 11 -1 7 2 213 208 11 1 13 2 388 398 17 5 1 3 376 362 19 -7 7 3 106 146 60

-3 2 2 373 372 7 0 7 2 359 359 8 2 13 2 294 287 18 6 1 3 328 298 20 -6 7 3 129 145 128

-2 2 2 173 184 8 1 7 2 138 153 52 3 13 2 334 320 19 7 1 3 124 142 124 -5 7 3 183 107 22

-1 2 2 161 150 7 2 7 2 503 488 9 4 13 2 175 186 31 8 1 3 0 27 1 -4 7 3 322 316 13

0 2 2 1844 1931 10 3 7 2 503 512 10 5 13 2 0 58 1 -9 2 3 100 64 99 -3 7 3 713 709 9

1 2 2 1034 1008 13 4 7 2 302 316 15 -5 14 2 121 154 120 -8 2 3 98 23 97 -2 7 3 445 450 8

2 2 2 191 184 13 5 7 2 449 469 16 -4 14 2 233 241 22 -7 2 3 392 362 13 -1 7 3 250 255 12

3 2 2 322 352 13 6 7 2 0 216 1 -3 14 2 0 122 1 -6 2 3 726 684 10 0 7 3 176 179 16

4 2 2 38 174 38 7 7 2 133 131 38 -2 14 2 356 324 16 -5 2 3 147 158 20 1 7 3 558 560 9

5 2 2 173 220 80 -8 8 2 222 178 23 -1 14 2 214 200 24 -4 2 3 814 841 11 2 7 3 421 405 11

6 2 2 0 62 1 -7 8 2 0 43 1 0 14 2 408 405 16 -3 2 3 679 702 8 3 7 3 354 349 14

7 2 2 158 274 157 -6 8 2 159 202 85 1 14 2 128 275 128 -2 2 3 127 114 14 4 7 3 126 269 126

8 2 2 73 169 73 -5 8 2 375 372 13 2 14 2 0 18 1 -1 2 3 0 69 1 5 7 3 470 476 16

-9 3 2 0 74 1 -4 8 2 0 65 1 3 14 2 328 308 21 0 2 3 851 894 11 6 7 3 105 193 104

-8 3 2 0 79 1 -3 8 2 646 637 9 4 14 2 113 159 112 1 2 3 916 907 13 7 7 3 221 178 33

-7 3 2 319 302 16 -2 8 2 781 801 11 5 14 2 0 38 1 2 2 3 1134 1088 15 -8 8 3 126 91 93

-6 3 2 152 137 23 -1 8 2 288 277 9 -5 15 2 226 207 20 3 2 3 179 185 22 -7 8 3 133 107 133

-5 3 2 606 597 8 0 8 2 415 437 9 -4 15 2 99 104 99 4 2 3 138 135 92 -6 8 3 114 130 114

-4 3 2 332 329 8 1 8 2 293 275 11 -3 15 2 332 334 18 5 2 3 0 167 1 -5 8 3 160 148 22

-3 3 2 736 749 11 2 8 2 288 286 13 -2 15 2 60 106 59 6 2 3 208 178 86 -4 8 3 405 406 11

-2 3 2 650 668 10 3 8 2 475 440 10 -1 15 2 0 40 1 7 2 3 91 74 91 -3 8 3 0 111 1

-1 3 2 457 482 6 4 8 2 134 192 133 0 15 2 60 92 59 8 2 3 198 241 125 -2 8 3 338 338 11

0 3 2 870 897 11 5 8 2 126 136 126 1 15 2 0 214 1 -9 3 3 74 96 74 -1 8 3 1009 1013 14

1 3 2 222 221 9 6 8 2 99 221 98 2 15 2 0 114 1 -8 3 3 64 148 64 0 8 3 686 707 10

2 3 2 652 644 9 7 8 2 61 106 60 3 15 2 89 205 88 -7 3 3 232 224 18 1 8 3 228 200 14

3 3 2 656 677 9 -8 9 2 38 29 37 4 15 2 159 157 24 -6 3 3 365 345 11 2 8 3 501 480 11

4 3 2 399 399 13 -7 9 2 185 267 79 -4 16 2 0 80 1 -5 3 3 161 160 16 3 8 3 100 195 100

5 3 2 443 465 15 -6 9 2 360 352 15 -3 16 2 0 90 1 -4 3 3 562 569 7 4 8 3 136 193 135

6 3 2 288 317 22 -5 9 2 267 250 18 -2 16 2 173 159 64 -3 3 3 702 729 9 5 8 3 242 223 25

7 3 2 172 223 171 -4 9 2 36 37 35 -1 16 2 174 194 35 -2 3 3 550 565 8 6 8 3 111 127 87

8 3 2 134 268 134 -3 9 2 34 67 33 0 16 2 416 415 16 -1 3 3 489 495 7 7 8 3 65 175 64

-9 4 2 87 91 86 -2 9 2 610 619 9 1 16 2 111 99 58 0 3 3 252 219 8 -8 9 3 0 66 1

-8 4 2 54 158 54 -1 9 2 391 380 10 2 16 2 87 151 86 1 3 3 608 609 10 -7 9 3 154 48 69

-7 4 2 93 104 93 0 9 2 258 269 12 3 16 2 102 96 102 2 3 3 645 632 10 -6 9 3 391 382 14

-6 4 2 299 297 14 1 9 2 413 421 10 -3 17 2 0 138 1 3 3 3 540 534 11 -5 9 3 0 123 1

-5 4 2 659 634 9 2 9 2 446 468 11 -2 17 2 214 235 26 4 3 3 559 577 13 -4 9 3 539 534 10

-4 4 2 205 178 12 3 9 2 434 425 12 -1 17 2 0 33 1 5 3 3 458 487 16 -3 9 3 77 3 76

-3 4 2 1010 1000 13 4 9 2 233 270 24 0 17 2 171 115 66 6 3 3 386 346 22 -2 9 3 303 292 12

-2 4 2 1377 1457 12 5 9 2 0 168 1 1 17 2 0 196 1 7 3 3 157 182 157 -1 9 3 147 156 24

-1 4 2 390 407 6 6 9 2 301 291 24 2 17 2 50 142 49 -9 4 3 288 305 16 0 9 3 264 259 12

0 4 2 391 397 6 7 9 2 173 141 64 -9 -1 3 108 117 107 -8 4 3 105 108 104 1 9 3 361 348 12

1 4 2 322 324 8 -7 10 2 131 122 107 -8 -1 3 93 152 92 -7 4 3 0 107 1 2 9 3 566 570 11

2 4 2 141 136 19 -6 10 2 127 38 126 -7 -1 3 133 152 94 -6 4 3 242 235 17 3 9 3 166 188 78

3 4 2 803 801 11 -5 10 2 321 295 17 -6 -1 3 541 535 13 -5 4 3 45 95 45 4 9 3 563 542 16

4 4 2 219 240 22 -4 10 2 239 256 19 -5 -1 3 156 161 24 -4 4 3 405 405 9 5 9 3 173 154 90

5 4 2 216 238 27 -3 10 2 254 231 14 -4 -1 3 753 792 12 -3 4 3 132 135 14 6 9 3 158 166 157

6 4 2 325 336 20 -2 10 2 342 334 13 -3 -1 3 398 414 9 -2 4 3 334 333 8 -7 10 3 240 210 19

7 4 2 154 93 153 -1 10 2 204 195 15 -2 -1 3 787 809 12 -1 4 3 1697 1781 12 -6 10 3 264 261 18

8 4 2 0 72 1 0 10 2 842 851 12 -1 -1 3 285 290 8 0 4 3 394 407 7 -5 10 3 182 168 25

-9 5 2 93 48 93 1 10 2 327 336 13 0 -1 3 273 264 9 1 4 3 250 236 11 -4 10 3 340 322 15

-8 5 2 201 121 22 2 10 2 158 65 65 1 -1 3 1173 1187 15 2 4 3 465 458 10 -3 10 3 365 360 13

-7 5 2 388 368 13 3 10 2 375 355 14 2 -1 3 638 646 9 3 4 3 124 104 123 -2 10 3 144 134 65

-6 5 2 602 579 11 4 10 2 314 316 18 3 -1 3 489 486 11 4 4 3 166 190 23 -1 10 3 680 676 10

-5 5 2 442 421 10 5 10 2 0 90 1 4 -1 3 736 738 12 5 4 3 246 225 24 0 10 3 353 345 13

-4 5 2 180 184 14 6 10 2 104 143 103 5 -1 3 395 349 18 6 4 3 156 189 40 1 10 3 360 354 13

-3 5 2 338 340 9 -7 11 2 84 66 84 6 -1 3 330 287 21 7 4 3 226 172 86 2 10 3 579 571 12

-2 5 2 813 835 11 -6 11 2 0 90 1 7 -1 3 142 148 74 -9 5 3 114 104 114 3 10 3 164 145 29

Observed and calculated structure factors for **3H44+Br44-**  Page 3

h k l 10Fo 10Fc 10s h k l 10Fo 10Fc 10s h k l 10Fo 10Fc 10s h k l 10Fo 10Fc 10s h k l 10Fo 10Fc 10s

4 10 3 195 166 26 -8 0 4 469 502 13 -3 5 4 658 655 10 -2 11 4 393 385 15 -5 1 5 314 290 15

5 10 3 179 95 74 -7 0 4 392 358 16 -2 5 4 165 179 16 -1 11 4 157 102 75 -4 1 5 562 549 10

6 10 3 197 155 29 -6 0 4 167 147 68 -1 5 4 257 268 12 0 11 4 351 359 16 -3 1 5 501 510 9

-7 11 3 146 212 32 -5 0 4 744 753 10 0 5 4 691 670 10 1 11 4 418 416 14 -2 1 5 594 604 8

-6 11 3 88 41 88 -4 0 4 228 218 15 1 5 4 188 191 15 2 11 4 194 172 27 -1 1 5 411 422 9

-5 11 3 86 86 86 -3 0 4 29 46 29 2 5 4 594 607 11 3 11 4 326 324 21 0 1 5 211 202 14

-4 11 3 254 256 22 -2 0 4 62 20 62 3 5 4 437 407 13 4 11 4 145 216 144 1 1 5 764 753 10

-3 11 3 437 410 13 -1 0 4 315 331 8 4 5 4 249 305 24 5 11 4 147 128 146 2 1 5 382 378 13

-2 11 3 330 329 14 0 0 4 856 880 12 5 5 4 397 384 18 -6 12 4 107 67 54 3 1 5 501 487 15

-1 11 3 0 111 1 1 0 4 889 866 13 6 5 4 134 162 134 -5 12 4 247 232 23 4 1 5 453 482 16

0 11 3 233 232 18 2 0 4 112 118 112 7 5 4 170 117 170 -4 12 4 98 191 98 5 1 5 259 231 30

1 11 3 409 387 14 3 0 4 196 178 23 -8 6 4 0 148 1 -3 12 4 0 37 1 6 1 5 199 166 40

2 11 3 267 241 18 4 0 4 0 70 1 -7 6 4 106 74 105 -2 12 4 319 325 16 7 1 5 0 141 1

3 11 3 260 232 20 5 0 4 0 53 1 -6 6 4 160 197 77 -1 12 4 0 157 1 -9 2 5 265 333 13

4 11 3 108 110 107 6 0 4 132 51 64 -5 6 4 507 468 10 0 12 4 365 366 16 -8 2 5 223 200 18

5 11 3 213 282 33 7 0 4 367 336 33 -4 6 4 92 143 92 1 12 4 328 310 20 -7 2 5 190 134 23

6 11 3 0 151 1 -9 1 4 88 71 87 -3 6 4 445 447 9 2 12 4 205 217 25 -6 2 5 86 215 85

-7 12 3 0 77 1 -8 1 4 135 123 78 -2 6 4 933 940 14 3 12 4 319 325 19 -5 2 5 107 112 107

-6 12 3 104 122 103 -7 1 4 260 253 19 -1 6 4 322 330 10 4 12 4 0 91 1 -4 2 5 295 256 12

-5 12 3 0 121 1 -6 1 4 224 267 18 0 6 4 360 354 10 5 12 4 0 60 1 -3 2 5 0 65 1

-4 12 3 333 260 18 -5 1 4 460 481 10 1 6 4 350 369 11 -6 13 4 0 51 1 -2 2 5 433 427 8

-3 12 3 196 177 22 -4 1 4 515 506 9 2 6 4 151 162 28 -5 13 4 114 124 47 -1 2 5 1214 1238 16

-2 12 3 262 261 22 -3 1 4 723 700 10 3 6 4 455 439 12 -4 13 4 232 268 21 0 2 5 471 485 10

-1 12 3 521 532 15 -2 1 4 363 361 8 4 6 4 162 205 93 -3 13 4 299 289 18 1 2 5 61 158 60

0 12 3 460 447 14 -1 1 4 314 311 9 5 6 4 151 143 151 -2 13 4 0 89 1 2 2 5 0 91 1

1 12 3 134 156 134 0 1 4 753 783 10 6 6 4 199 205 35 -1 13 4 132 140 131 3 2 5 349 317 15

2 12 3 252 233 19 1 1 4 537 517 8 7 6 4 184 109 167 0 13 4 262 207 23 4 2 5 0 112 1

3 12 3 179 112 81 2 1 4 496 483 11 -8 7 4 98 62 98 1 13 4 179 160 74 5 2 5 232 225 30

4 12 3 182 113 70 3 1 4 589 605 12 -7 7 4 179 276 71 2 13 4 285 260 20 6 2 5 339 343 29

5 12 3 0 104 1 4 1 4 352 356 16 -6 7 4 262 254 15 3 13 4 0 134 1 -9 3 5 0 17 1

-6 13 3 335 338 16 5 1 4 377 388 20 -5 7 4 450 440 12 4 13 4 243 254 29 -8 3 5 133 135 25

-5 13 3 40 57 40 6 1 4 232 216 85 -4 7 4 196 193 16 -5 14 4 162 137 33 -7 3 5 165 130 66

-4 13 3 333 336 17 7 1 4 131 91 130 -3 7 4 302 276 11 -4 14 4 0 81 1 -6 3 5 435 426 14

-3 13 3 158 181 108 -9 2 4 0 28 1 -2 7 4 452 448 9 -3 14 4 101 172 100 -5 3 5 153 81 56

-2 13 3 0 133 1 -8 2 4 144 119 66 -1 7 4 240 240 13 -2 14 4 183 195 78 -4 3 5 647 678 9

-1 13 3 0 34 1 -7 2 4 0 29 1 0 7 4 581 590 9 -1 14 4 309 306 18 -3 3 5 512 485 9

0 13 3 149 141 120 -6 2 4 0 83 1 1 7 4 581 596 9 0 14 4 334 324 17 -2 3 5 586 567 9

1 13 3 271 264 23 -5 2 4 662 636 9 2 7 4 317 325 14 1 14 4 191 169 77 -1 3 5 537 526 9

2 13 3 376 376 19 -4 2 4 30 64 30 3 7 4 526 524 13 2 14 4 89 114 88 0 3 5 197 194 18

3 13 3 152 70 91 -3 2 4 549 571 8 4 7 4 252 239 21 3 14 4 0 91 1 1 3 5 678 690 10

4 13 3 343 319 22 -2 2 4 1075 1106 14 5 7 4 319 326 22 -4 15 4 0 86 1 2 3 5 465 456 12

5 13 3 114 137 114 -1 2 4 396 397 7 6 7 4 220 181 38 -3 15 4 0 103 1 3 3 5 508 507 13

-5 14 3 142 163 108 0 2 4 355 362 9 -8 8 4 267 345 15 -2 15 4 200 268 76 4 3 5 480 497 16

-4 14 3 141 217 141 1 2 4 345 370 11 -7 8 4 276 276 17 -1 15 4 170 84 78 5 3 5 263 239 22

-3 14 3 242 233 21 2 2 4 342 335 12 -6 8 4 189 180 20 0 15 4 114 91 113 6 3 5 120 152 119

-2 14 3 93 88 93 3 2 4 546 536 12 -5 8 4 422 401 12 1 15 4 116 205 48 -9 4 5 59 122 58

-1 14 3 406 397 15 4 2 4 173 142 76 -4 8 4 99 154 99 2 15 4 113 84 113 -8 4 5 0 98 1

0 14 3 165 85 126 5 2 4 121 243 120 -3 8 4 139 57 61 -3 16 4 71 10 71 -7 4 5 225 195 20

1 14 3 162 214 130 6 2 4 244 267 28 -2 8 4 435 425 10 -2 16 4 315 331 17 -6 4 5 580 537 11

2 14 3 189 129 72 7 2 4 0 59 1 -1 8 4 344 355 10 -1 16 4 0 81 1 -5 4 5 210 206 19

3 14 3 166 124 33 -9 3 4 94 68 93 0 8 4 736 744 10 0 16 4 0 148 1 -4 4 5 626 614 10

4 14 3 135 165 123 -8 3 4 114 48 113 1 8 4 429 428 11 1 16 4 0 200 1 -3 4 5 688 686 9

-5 15 3 0 36 1 -7 3 4 230 224 17 2 8 4 333 332 14 -9 -1 5 0 24 1 -2 4 5 320 333 10

-4 15 3 187 174 24 -6 3 4 141 164 71 3 8 4 304 302 19 -8 -1 5 132 136 131 -1 4 5 184 185 14

-3 15 3 123 228 123 -5 3 4 459 453 9 4 8 4 114 107 114 -7 -1 5 262 255 23 0 4 5 699 691 9

-2 15 3 254 262 23 -4 3 4 304 318 10 5 8 4 0 63 1 -6 -1 5 249 257 27 1 4 5 106 89 105

-1 15 3 0 122 1 -3 3 4 476 488 8 6 8 4 207 151 93 -5 -1 5 298 263 14 2 4 5 540 540 12

0 15 3 104 113 104 -2 3 4 623 632 8 -8 9 4 96 155 96 -4 -1 5 520 534 10 3 4 5 183 214 31

1 15 3 164 188 29 -1 3 4 273 282 9 -7 9 4 0 85 1 -3 -1 5 472 489 9 4 4 5 0 64 1

2 15 3 163 211 111 0 3 4 812 829 12 -6 9 4 54 121 54 -2 -1 5 597 602 9 5 4 5 0 107 1

3 15 3 146 176 40 1 3 4 519 488 9 -5 9 4 343 342 14 -1 -1 5 409 442 9 6 4 5 241 138 93

-4 16 3 188 173 21 2 3 4 526 525 10 -4 9 4 437 420 12 0 -1 5 196 194 16 -8 5 5 59 136 59

-3 16 3 0 60 1 3 3 4 571 578 12 -3 9 4 531 516 11 1 -1 5 758 766 12 -7 5 5 362 368 14

-2 16 3 157 132 41 4 3 4 278 291 19 -2 9 4 130 192 111 2 -1 5 401 391 14 -6 5 5 145 218 102

-1 16 3 92 191 92 5 3 4 327 362 21 -1 9 4 147 176 60 3 -1 5 485 487 13 -5 5 5 207 176 19

0 16 3 231 250 24 6 3 4 232 239 33 0 9 4 518 540 11 4 -1 5 511 496 15 -4 5 5 417 378 10

1 16 3 0 67 1 7 3 4 0 49 1 1 9 4 133 172 132 5 -1 5 137 217 136 -3 5 5 548 548 9

2 16 3 292 299 19 -9 4 4 125 37 63 2 9 4 472 462 12 6 -1 5 56 168 55 -2 5 5 468 453 9

-2 17 3 0 83 1 -8 4 4 418 448 13 3 9 4 165 251 124 7 -1 5 229 134 229 -1 5 5 328 340 12

-1 17 3 0 76 1 -7 4 4 331 297 16 4 9 4 359 329 18 -9 0 5 97 130 38 0 5 5 229 226 13

0 17 3 102 174 101 -6 4 4 80 85 79 5 9 4 253 261 28 -8 0 5 0 118 1 1 5 5 494 517 11

1 17 3 0 117 1 -5 4 4 560 558 9 6 9 4 170 137 126 -7 0 5 219 213 26 2 5 5 327 356 16

-9 -1 4 0 70 1 -4 4 4 146 130 16 -7 10 4 0 46 1 -6 0 5 584 535 12 3 5 5 405 386 15

-8 -1 4 106 122 70 -3 4 4 141 147 16 -6 10 4 94 142 94 -5 0 5 131 166 130 4 5 5 357 367 17

-7 -1 4 296 253 21 -2 4 4 330 330 9 -5 10 4 375 353 17 -4 0 5 708 692 11 5 5 5 177 238 135

-6 -1 4 296 270 16 -1 4 4 165 183 13 -4 10 4 215 200 19 -3 0 5 1021 1001 15 6 5 5 140 113 140

-5 -1 4 429 467 12 0 4 4 910 933 14 -3 10 4 300 296 15 -2 0 5 110 81 58 -8 6 5 147 161 62

-4 -1 4 467 484 9 1 4 4 764 766 11 -2 10 4 623 625 10 -1 0 5 124 131 18 -7 6 5 98 111 97

-3 -1 4 647 677 9 2 4 4 277 283 15 -1 10 4 236 233 18 0 0 5 467 486 9 -6 6 5 213 175 21

-2 -1 4 318 332 8 3 4 4 244 251 18 0 10 4 209 221 22 1 0 5 0 43 1 -5 6 5 178 181 24

-1 -1 4 279 263 9 4 4 4 0 185 1 1 10 4 384 379 14 2 0 5 584 586 11 -4 6 5 311 316 13

0 -1 4 794 818 11 5 4 4 129 64 129 2 10 4 251 243 23 3 0 5 387 364 15 -3 6 5 141 155 61

1 -1 4 519 503 9 6 4 4 176 146 123 3 10 4 151 163 50 4 0 5 0 24 1 -2 6 5 251 220 12

2 -1 4 470 463 11 7 4 4 339 311 30 4 10 4 126 115 60 5 0 5 0 14 1 -1 6 5 863 849 12

3 -1 4 634 617 11 -9 5 4 0 61 1 5 10 4 170 106 107 6 0 5 157 113 157 0 6 5 392 398 12

4 -1 4 338 345 16 -8 5 4 160 170 26 -7 11 4 160 167 27 7 0 5 0 98 1 1 6 5 148 50 65

5 -1 4 395 400 18 -7 5 4 112 113 112 -6 11 4 0 161 1 -9 1 5 0 28 1 2 6 5 54 163 54

6 -1 4 152 218 151 -6 5 4 154 130 65 -5 11 4 315 306 18 -8 1 5 0 141 1 3 6 5 82 297 81

7 -1 4 0 95 1 -5 5 4 336 351 14 -4 11 4 0 36 1 -7 1 5 277 267 20 4 6 5 0 13 1

-9 0 4 119 23 49 -4 5 4 400 388 10 -3 11 4 207 204 20 -6 1 5 295 263 16 5 6 5 140 94 140

Observed and calculated structure factors for **3H44+Br44-** Page 4

h k l 10Fo 10Fc 10s h k l 10Fo 10Fc 10s h k l 10Fo 10Fc 10s h k l 10Fo 10Fc 10s h k l 10Fo 10Fc 10s

6 6 5 345 289 29 -5 14 5 159 138 63 0 3 6 588 601 10 -7 10 6 101 173 101 3 1 7 338 328 23

-8 7 5 105 70 104 -4 14 5 69 151 68 1 3 6 446 437 11 -6 10 6 188 192 21 4 1 7 293 261 23

-7 7 5 132 97 101 -3 14 5 71 141 71 2 3 6 393 391 14 -5 10 6 0 180 1 5 1 7 0 142 1

-6 7 5 278 279 16 -2 14 5 152 120 96 3 3 6 302 295 21 -4 10 6 164 143 78 -8 2 7 48 66 47

-5 7 5 127 190 127 -1 14 5 143 225 143 4 3 6 398 404 19 -3 10 6 0 23 1 -7 2 7 104 53 104

-4 7 5 557 540 10 0 14 5 192 235 92 5 3 6 217 212 107 -2 10 6 328 321 17 -6 2 7 454 395 15

-3 7 5 171 177 16 1 14 5 0 43 1 6 3 6 0 131 1 -1 10 6 352 324 18 -5 2 7 175 77 27

-2 7 5 450 444 10 2 14 5 281 310 27 -8 4 6 0 132 1 0 10 6 250 239 21 -4 2 7 233 210 17

-1 7 5 300 285 15 -4 15 5 252 268 21 -7 4 6 196 161 23 1 10 6 238 263 23 -3 2 7 636 630 11

0 7 5 135 115 78 -3 15 5 151 127 98 -6 4 6 289 253 17 2 10 6 245 209 22 -2 2 7 145 189 81

1 7 5 513 532 12 -2 15 5 134 111 30 -5 4 6 337 300 14 3 10 6 0 146 1 -1 2 7 100 108 100

2 7 5 364 336 15 -1 15 5 0 62 1 -4 4 6 108 80 107 4 10 6 0 53 1 0 2 7 325 323 14

3 7 5 344 342 16 0 15 5 190 162 38 -3 4 6 208 219 16 -6 11 6 131 77 90 1 2 7 390 404 14

4 7 5 316 349 24 1 15 5 146 197 54 -2 4 6 786 803 11 -5 11 6 0 120 1 2 2 7 410 425 17

5 7 5 101 180 100 -2 16 5 134 147 133 -1 4 6 388 399 11 -4 11 6 328 309 15 3 2 7 0 272 1

6 7 5 0 63 1 -1 16 5 42 204 41 0 4 6 0 116 1 -3 11 6 181 178 67 4 2 7 263 204 30

-8 8 5 109 76 108 0 16 5 163 178 91 1 4 6 396 379 12 -2 11 6 129 143 129 5 2 7 0 45 1

-7 8 5 51 84 51 -9 -1 6 129 70 22 2 4 6 407 408 15 -1 11 6 147 111 41 -8 3 7 80 141 80

-6 8 5 380 360 15 -8 -1 6 204 216 23 3 4 6 115 87 114 0 11 6 365 387 18 -7 3 7 107 220 107

-5 8 5 0 58 1 -7 -1 6 147 177 147 4 4 6 134 193 134 1 11 6 98 61 98 -6 3 7 167 245 75

-4 8 5 440 423 11 -6 -1 6 323 301 20 5 4 6 205 237 119 2 11 6 301 318 25 -5 3 7 324 291 16

-3 8 5 421 408 11 -5 -1 6 450 414 12 6 4 6 0 60 1 3 11 6 0 102 1 -4 3 7 493 469 12

-2 8 5 328 325 13 -4 -1 6 219 212 20 -8 5 6 0 135 1 4 11 6 280 235 38 -3 3 7 323 306 15

-1 8 5 362 369 12 -3 -1 6 583 572 10 -7 5 6 242 228 19 -6 12 6 0 104 1 -2 3 7 246 255 16

0 8 5 364 364 13 -2 -1 6 332 328 12 -6 5 6 192 159 19 -5 12 6 108 190 108 -1 3 7 475 476 11

1 8 5 114 111 113 -1 -1 6 255 246 14 -5 5 6 475 457 12 -4 12 6 0 41 1 0 3 7 286 284 17

2 8 5 421 382 15 0 -1 6 670 691 10 -4 5 6 243 206 16 -3 12 6 146 111 38 1 3 7 411 439 15

3 8 5 0 171 1 1 -1 6 269 281 15 -3 5 6 517 493 11 -2 12 6 355 342 16 2 3 7 250 226 20

4 8 5 0 125 1 2 -1 6 278 248 17 -2 5 6 243 232 15 -1 12 6 292 305 19 3 3 7 264 265 25

5 8 5 0 58 1 3 -1 6 377 349 16 -1 5 6 135 201 81 0 12 6 132 16 131 4 3 7 311 242 28

-8 9 5 101 98 101 4 -1 6 341 313 25 0 5 6 518 534 11 1 12 6 193 258 100 5 3 7 115 166 115

-7 9 5 119 234 119 5 -1 6 277 237 31 1 5 6 345 332 13 2 12 6 96 142 95 -8 4 7 196 199 15

-6 9 5 170 135 63 6 -1 6 0 137 1 2 5 6 224 234 22 3 12 6 0 92 1 -7 4 7 141 154 25

-5 9 5 159 167 83 -9 0 6 102 107 67 3 5 6 408 393 16 -5 13 6 171 206 23 -6 4 7 303 279 16

-4 9 5 169 147 76 -8 0 6 86 153 85 4 5 6 133 175 69 -4 13 6 173 146 66 -5 4 7 0 97 1

-3 9 5 485 457 11 -7 0 6 106 120 105 5 5 6 311 282 28 -3 13 6 149 207 90 -4 4 7 67 48 66

-2 9 5 302 290 14 -6 0 6 280 234 17 -8 6 6 194 235 17 -2 13 6 60 96 60 -3 4 7 200 202 18

-1 9 5 168 174 20 -5 0 6 452 397 13 -7 6 6 337 332 15 -1 13 6 175 159 86 -2 4 7 372 366 13

0 9 5 114 144 51 -4 0 6 0 53 1 -6 6 6 148 147 72 0 13 6 180 215 94 -1 4 7 344 338 14

1 9 5 179 193 67 -3 0 6 293 276 12 -5 6 6 424 382 13 1 13 6 245 220 25 0 4 7 311 303 16

2 9 5 267 269 21 -2 0 6 812 830 12 -4 6 6 211 181 20 2 13 6 189 63 85 1 4 7 0 60 1

3 9 5 277 286 21 -1 0 6 206 208 16 -3 6 6 72 104 71 -4 14 6 110 98 109 2 4 7 139 148 42

4 9 5 195 161 32 0 0 6 0 13 1 -2 6 6 319 298 13 -3 14 6 222 89 22 3 4 7 255 241 30

5 9 5 249 230 40 1 0 6 547 555 11 -1 6 6 488 479 11 -2 14 6 292 282 20 4 4 7 160 90 159

-7 10 5 0 51 1 2 0 6 465 460 13 0 6 6 169 207 74 -1 14 6 116 101 116 5 4 7 69 58 69

-6 10 5 107 168 107 3 0 6 0 29 1 1 6 6 463 450 12 0 14 6 136 75 136 -8 5 7 70 86 69

-5 10 5 129 117 129 4 0 6 0 54 1 2 6 6 304 311 20 1 14 6 169 122 39 -7 5 7 36 164 36

-4 10 5 110 158 56 5 0 6 278 317 41 3 6 6 76 135 76 -3 15 6 0 115 1 -6 5 7 138 147 29

-3 10 5 167 250 82 6 0 6 116 146 116 4 6 6 0 83 1 -2 15 6 167 100 82 -5 5 7 294 237 15

-2 10 5 200 230 21 -9 1 6 52 63 51 5 6 6 220 72 104 -1 15 6 168 53 64 -4 5 7 429 400 14

-1 10 5 399 369 13 -8 1 6 143 218 86 -8 7 6 118 157 74 0 15 6 0 125 1 -3 5 7 136 184 104

0 10 5 434 428 15 -7 1 6 150 180 104 -7 7 6 0 57 1 -8 -1 7 51 78 50 -2 5 7 315 332 15

1 10 5 157 122 68 -6 1 6 352 302 17 -6 7 6 117 146 48 -7 -1 7 168 176 83 -1 5 7 349 352 13

2 10 5 190 202 79 -5 1 6 460 444 13 -5 7 6 295 289 16 -6 -1 7 315 276 19 0 5 7 0 96 1

3 10 5 78 135 78 -4 1 6 207 204 23 -4 7 6 447 431 14 -5 -1 7 333 264 18 1 5 7 382 396 14

4 10 5 0 44 1 -3 1 6 585 583 9 -3 7 6 373 343 13 -4 -1 7 565 515 12 2 5 7 242 248 26

5 10 5 201 126 112 -2 1 6 316 313 11 -2 7 6 337 338 13 -3 -1 7 407 389 12 3 5 7 189 202 35

-7 11 5 103 65 103 -1 1 6 258 255 14 -1 7 6 127 123 107 -2 -1 7 305 286 14 4 5 7 77 172 76

-6 11 5 208 216 20 0 1 6 676 665 10 0 7 6 569 575 11 -1 -1 7 502 527 11 5 5 7 0 99 1

-5 11 5 0 123 1 1 1 6 285 295 16 1 7 6 220 187 19 0 -1 7 168 176 25 -8 6 7 128 38 47

-4 11 5 465 426 13 2 1 6 255 264 19 2 7 6 286 314 19 1 -1 7 466 464 14 -7 6 7 145 21 60

-3 11 5 183 179 27 3 1 6 380 353 17 3 7 6 0 158 1 2 -1 7 375 392 21 -6 6 7 322 306 14

-2 11 5 233 223 19 4 1 6 365 336 19 4 7 6 436 408 18 3 -1 7 278 300 22 -5 6 7 136 136 135

-1 11 5 164 116 65 5 1 6 279 245 29 5 7 6 117 210 117 4 -1 7 198 268 103 -4 6 7 198 193 25

0 11 5 196 196 26 6 1 6 0 133 1 -8 8 6 82 100 81 5 -1 7 0 151 1 -3 6 7 423 406 13

1 11 5 233 235 22 -9 2 6 0 36 1 -7 8 6 59 115 58 -8 0 7 168 166 20 -2 6 7 250 224 19

2 11 5 280 219 23 -8 2 6 237 252 19 -6 8 6 146 120 31 -7 0 7 171 198 25 -1 6 7 0 93 1

3 11 5 289 252 20 -7 2 6 450 443 15 -5 8 6 177 223 66 -6 0 7 343 348 17 0 6 7 398 393 13

4 11 5 300 284 24 -6 2 6 81 109 81 -4 8 6 94 73 93 -5 0 7 214 191 21 1 6 7 231 211 24

-6 12 5 168 200 31 -5 2 6 481 462 12 -3 8 6 84 45 84 -4 0 7 148 8 28 2 6 7 214 237 29

-5 12 5 156 134 58 -4 2 6 74 104 73 -2 8 6 637 626 11 -3 0 7 121 118 120 3 6 7 107 185 107

-4 12 5 114 129 113 -3 2 6 109 39 109 -1 8 6 405 389 13 -2 0 7 333 340 12 4 6 7 305 225 27

-3 12 5 278 246 21 -2 2 6 122 155 22 0 8 6 103 130 102 -1 0 7 281 300 15 -7 7 7 150 192 28

-2 12 5 307 304 17 -1 2 6 721 738 10 1 8 6 432 417 15 0 0 7 531 523 11 -6 7 7 262 276 16

-1 12 5 437 444 16 0 2 6 382 341 11 2 8 6 134 264 134 1 0 7 160 110 25 -5 7 7 110 162 109

0 12 5 283 284 20 1 2 6 505 512 11 3 8 6 145 135 144 2 0 7 0 87 1 -4 7 7 384 354 14

1 12 5 133 80 49 2 2 6 302 288 17 4 8 6 0 136 1 3 0 7 350 321 20 -3 7 7 374 364 16

2 12 5 0 201 1 3 2 6 86 74 86 5 8 6 135 141 134 4 0 7 0 81 1 -2 7 7 214 172 20

3 12 5 205 176 83 4 2 6 176 74 77 -7 9 6 207 210 18 5 0 7 0 143 1 -1 7 7 277 282 19

4 12 5 0 77 1 5 2 6 0 121 1 -6 9 6 135 167 98 -8 1 7 98 84 98 0 7 7 249 291 19

-6 13 5 0 71 1 6 2 6 218 30 217 -5 9 6 253 251 20 -7 1 7 91 176 90 1 7 7 272 231 21

-5 13 5 128 145 127 -9 3 6 40 44 39 -4 9 6 146 133 108 -6 1 7 300 287 17 2 7 7 292 248 22

-4 13 5 80 82 80 -8 3 6 109 188 41 -3 9 6 316 266 16 -5 1 7 291 270 18 3 7 7 216 226 29

-3 13 5 341 339 17 -7 3 6 95 151 94 -2 9 6 162 158 26 -4 1 7 529 506 12 4 7 7 210 218 127

-2 13 5 59 148 59 -6 3 6 153 255 117 -1 9 6 193 197 23 -3 1 7 391 401 13 -7 8 7 0 112 1

-1 13 5 0 137 1 -5 3 6 311 287 15 0 9 6 360 398 15 -2 1 7 274 288 16 -6 8 7 237 242 18

0 13 5 238 230 23 -4 3 6 647 618 11 1 9 6 363 348 16 -1 1 7 523 523 11 -5 8 7 151 177 84

1 13 5 254 212 21 -3 3 6 454 461 10 2 9 6 169 79 79 0 1 7 209 198 20 -4 8 7 155 64 31

2 13 5 255 248 23 -2 3 6 340 338 11 3 9 6 333 303 22 1 1 7 469 480 14 -3 8 7 288 278 18

3 13 5 177 184 152 -1 3 6 167 156 18 4 9 6 0 110 1 2 1 7 391 392 15 -2 8 7 269 232 18

Observed and calculated structure factors for **3H44+Br44-** Page 5

h k l 10Fo 10Fc 10s h k l 10Fo 10Fc 10s h k l 10Fo 10Fc 10s h k l 10Fo 10Fc 10s h k l 10Fo 10Fc 10s

-1 8 7 251 257 20 0 1 8 372 362 15 2 8 8 259 155 25 -7 4 9 89 183 88 1 1 10 0 108 1

0 8 7 218 208 20 1 1 8 116 189 116 3 8 8 238 68 112 -6 4 9 152 192 64 2 1 10 163 168 163

1 8 7 177 209 78 2 1 8 174 186 83 -6 9 8 103 149 103 -5 4 9 0 66 1 -6 2 10 66 76 65

2 8 7 46 204 45 3 1 8 248 208 31 -5 9 8 53 96 53 -4 4 9 0 91 1 -5 2 10 104 123 50

3 8 7 190 180 103 4 1 8 172 179 171 -4 9 8 274 278 19 -3 4 9 285 308 17 -4 2 10 118 192 118

4 8 7 86 94 86 -8 2 8 98 59 97 -3 9 8 91 149 91 -2 4 9 176 166 29 -3 2 10 182 194 31

-7 9 7 118 142 85 -7 2 8 0 96 1 -2 9 8 150 163 109 -1 4 9 105 51 105 -2 2 10 82 83 82

-6 9 7 0 123 1 -6 2 8 163 151 26 -1 9 8 74 54 74 0 4 9 166 251 113 -1 2 10 289 294 20

-5 9 7 282 269 15 -5 2 8 73 70 72 0 9 8 155 195 39 1 4 9 340 340 20 0 2 10 0 308 1

-4 9 7 401 403 14 -4 2 8 72 95 72 1 9 8 0 91 1 2 4 9 0 56 1 1 2 10 0 82 1

-3 9 7 90 109 89 -3 2 8 302 273 19 2 9 8 131 144 130 3 4 9 144 117 143 2 2 10 243 174 38

-2 9 7 286 281 17 -2 2 8 560 554 12 -6 10 8 139 91 24 -7 5 9 0 141 1 -6 3 10 79 52 79

-1 9 7 192 199 30 -1 2 8 0 79 1 -5 10 8 104 35 104 -6 5 9 167 217 17 -5 3 10 233 293 17

0 9 7 0 150 1 0 2 8 203 214 26 -4 10 8 111 94 110 -5 5 9 162 194 62 -4 3 10 137 162 35

1 9 7 273 279 21 1 2 8 0 238 1 -3 10 8 115 130 115 -4 5 9 376 360 15 -3 3 10 141 208 141

2 9 7 156 132 156 2 2 8 366 361 20 -2 10 8 224 229 25 -3 5 9 145 127 33 -2 3 10 152 184 88

3 9 7 344 280 27 3 2 8 149 46 54 -1 10 8 180 218 79 -2 5 9 182 166 69 -1 3 10 95 95 95

-6 10 7 197 236 20 4 2 8 231 108 145 0 10 8 0 99 1 -1 5 9 238 260 21 0 3 10 259 201 26

-5 10 7 127 125 127 -8 3 8 178 198 21 1 10 8 191 181 103 0 5 9 178 138 82 1 3 10 157 54 118

-4 10 7 196 204 23 -7 3 8 151 184 58 2 10 8 168 123 167 1 5 9 195 94 80 -6 4 10 0 133 1

-3 10 7 177 200 85 -6 3 8 95 111 94 -5 11 8 208 212 19 2 5 9 235 179 33 -5 4 10 87 71 86

-2 10 7 298 281 20 -5 3 8 448 441 14 -4 11 8 116 118 116 -6 6 9 192 215 18 -4 4 10 0 85 1

-1 10 7 171 134 30 -4 3 8 0 92 1 -3 11 8 100 190 99 -5 6 9 91 51 91 -3 4 10 296 269 19

0 10 7 282 265 22 -3 3 8 478 448 16 -2 11 8 0 111 1 -4 6 9 137 160 86 -2 4 10 111 77 110

1 10 7 157 230 157 -2 3 8 231 242 21 -1 11 8 0 114 1 -3 6 9 0 95 1 -1 4 10 97 82 97

2 10 7 201 122 83 -1 3 8 58 133 57 0 11 8 184 200 29 -2 6 9 371 358 16 0 4 10 130 106 130

3 10 7 174 117 174 0 3 8 483 426 15 1 11 8 0 131 1 -1 6 9 0 37 1 1 4 10 160 64 159

-6 11 7 77 155 77 1 3 8 200 173 35 -4 12 8 143 86 32 0 6 9 110 161 110 -6 5 10 62 103 62

-5 11 7 0 111 1 2 3 8 297 250 23 -3 12 8 91 144 91 1 6 9 205 190 32 -5 5 10 92 194 92

-4 11 7 293 266 14 3 3 8 287 258 25 -2 12 8 239 257 22 2 6 9 123 141 123 -4 5 10 131 73 79

-3 11 7 188 270 84 4 3 8 111 137 110 -1 12 8 0 160 1 -6 7 9 136 139 20 -3 5 10 143 212 103

-2 11 7 173 93 83 -8 4 8 0 65 1 0 12 8 187 8 78 -5 7 9 230 233 16 -2 5 10 127 178 47

-1 11 7 192 224 71 -7 4 8 223 251 18 -7 -1 9 133 173 63 -4 7 9 240 291 20 -1 5 10 0 45 1

0 11 7 198 228 83 -6 4 8 116 122 41 -6 -1 9 0 170 1 -3 7 9 0 84 1 0 5 10 48 197 48

1 11 7 104 79 104 -5 4 8 291 299 17 -5 -1 9 281 262 17 -2 7 9 72 54 72 1 5 10 103 69 103

2 11 7 72 187 71 -4 4 8 128 99 128 -4 -1 9 385 356 17 -1 7 9 266 274 24 -5 6 10 0 64 1

-5 12 7 123 118 93 -3 4 8 128 125 127 -3 -1 9 106 112 105 0 7 9 0 35 1 -4 6 10 52 116 52

-4 12 7 0 7 1 -2 4 8 182 155 24 -2 -1 9 122 125 122 1 7 9 184 185 50 -3 6 10 0 132 1

-3 12 7 234 218 23 -1 4 8 550 538 14 -1 -1 9 297 327 22 2 7 9 0 122 1 -2 6 10 0 69 1

-2 12 7 0 156 1 0 4 8 204 206 28 0 -1 9 109 103 108 -6 8 9 0 170 1 -1 6 10 286 265 25

-1 12 7 62 150 62 1 4 8 250 219 27 1 -1 9 130 192 130 -5 8 9 113 59 113 0 6 10 248 220 25

0 12 7 91 155 91 2 4 8 214 208 30 2 -1 9 147 133 146 -4 8 9 77 8 76 1 6 10 193 53 102

1 12 7 147 125 59 3 4 8 158 46 157 3 -1 9 191 169 135 -3 8 9 208 192 25 -5 7 10 128 174 69

2 12 7 275 245 27 4 4 8 0 90 1 -7 0 9 111 187 110 -2 8 9 139 187 138 -4 7 10 156 168 21

-4 13 7 199 191 29 -7 5 8 76 90 75 -6 0 9 77 168 76 -1 8 9 0 34 1 -3 7 10 155 106 60

-3 13 7 154 87 83 -6 5 8 107 185 106 -5 0 9 0 49 1 0 8 9 0 207 1 -2 7 10 175 168 34

-2 13 7 172 117 84 -5 5 8 264 264 18 -4 0 9 0 23 1 1 8 9 255 237 34 -1 7 10 76 129 75

-1 13 7 110 111 109 -4 5 8 403 339 15 -3 0 9 189 171 26 -5 9 9 113 119 32 0 7 10 209 148 77

0 13 7 0 138 1 -3 5 8 328 321 14 -2 0 9 0 8 1 -4 9 9 131 261 131 -4 8 10 152 156 56

1 13 7 0 182 1 -2 5 8 106 224 106 -1 0 9 138 15 137 -3 9 9 139 94 93 -3 8 10 55 178 54

-3 14 7 0 62 1 -1 5 8 0 80 1 0 0 9 214 238 83 -2 9 9 111 115 111 -2 8 10 176 125 30

-2 14 7 192 185 33 0 5 8 310 314 17 1 0 9 443 431 21 -1 9 9 188 146 70 -1 8 10 0 86 1

-1 14 7 205 137 75 1 5 8 191 172 83 2 0 9 0 114 1 0 9 9 126 139 125 -5 -1 11 106 111 83

-8 -1 8 188 244 16 2 5 8 115 162 115 3 0 9 80 97 80 1 9 9 206 42 86 -4 -1 11 224 235 16

-7 -1 8 38 163 37 3 5 8 289 198 30 -7 1 9 66 175 66 -4 10 9 75 48 74 -3 -1 11 117 124 31

-6 -1 8 0 146 1 4 5 8 0 241 1 -6 1 9 0 171 1 -3 10 9 40 92 39 -2 -1 11 0 28 1

-5 -1 8 390 379 16 -7 6 8 0 52 1 -5 1 9 237 249 20 -2 10 9 218 216 26 -1 -1 11 0 102 1

-4 -1 8 283 264 20 -6 6 8 64 155 63 -4 1 9 360 339 16 -1 10 9 0 46 1 0 -1 11 98 59 98

-3 -1 8 511 454 13 -5 6 8 78 92 78 -3 1 9 0 116 1 0 10 9 129 87 129 -5 0 11 0 12 1

-2 -1 8 333 318 16 -4 6 8 113 90 113 -2 1 9 167 104 82 -3 11 9 142 89 86 -4 0 11 143 158 20

-1 -1 8 170 190 75 -3 6 8 171 142 23 -1 1 9 339 329 19 -2 11 9 127 130 126 -3 0 11 0 66 1

0 -1 8 376 370 16 -2 6 8 390 393 15 0 1 9 90 98 89 -1 11 9 227 208 35 -2 0 11 354 389 15

1 -1 8 164 193 99 -1 6 8 193 191 72 1 1 9 148 199 147 -6 -1 10 0 111 1 -1 0 11 80 173 80

2 -1 8 153 172 153 0 6 8 172 190 32 2 1 9 166 138 44 -5 -1 10 260 289 17 0 0 11 0 50 1

3 -1 8 166 193 166 1 6 8 148 148 147 3 1 9 0 165 1 -4 -1 10 68 168 68 -5 1 11 55 99 54

4 -1 8 211 192 161 2 6 8 380 377 19 -7 2 9 0 49 1 -3 -1 10 256 253 20 -4 1 11 167 232 21

-8 0 8 0 48 1 3 6 8 0 51 1 -6 2 9 260 229 17 -2 -1 10 271 263 19 -3 1 11 146 117 26

-7 0 8 310 318 15 -7 7 8 0 189 1 -5 2 9 0 81 1 -1 -1 10 0 60 1 -2 1 11 0 24 1

-6 0 8 60 17 59 -6 7 8 113 84 113 -4 2 9 178 143 68 0 -1 10 209 246 30 -1 1 11 154 128 86

-5 0 8 328 318 17 -5 7 8 284 265 18 -3 2 9 191 154 24 1 -1 10 0 105 1 0 1 11 138 58 103

-4 0 8 286 262 19 -4 7 8 0 97 1 -2 2 9 447 412 15 2 -1 10 134 166 134 -5 2 11 0 70 1

-3 0 8 83 107 82 -3 7 8 311 330 17 -1 2 9 0 14 1 -6 0 10 156 164 17 -4 2 11 163 165 26

-2 0 8 100 4 100 -2 7 8 278 263 18 0 2 9 0 231 1 -5 0 10 52 67 52 -3 2 11 83 146 82

-1 0 8 682 676 12 -1 7 8 131 106 130 1 2 9 197 166 33 -4 0 10 79 55 79 -2 2 11 162 79 73

0 0 8 158 169 33 0 7 8 378 402 17 2 2 9 124 50 123 -3 0 10 308 301 19 -1 2 11 78 64 77

1 0 8 0 38 1 1 7 8 163 160 107 3 2 9 316 189 41 -2 0 10 159 157 82 -4 3 11 195 220 17

2 0 8 185 180 82 2 7 8 215 211 96 -7 3 9 140 181 59 -1 0 10 0 69 1 -3 3 11 138 61 68

3 0 8 0 158 1 3 7 8 177 160 49 -6 3 9 0 134 1 0 0 10 200 157 27 -2 3 11 0 71 1

4 0 8 0 24 1 -7 8 8 190 179 17 -5 3 9 248 295 23 1 0 10 171 60 118 -1 3 11 107 152 78

-8 1 8 126 237 72 -6 8 8 111 101 111 -4 3 9 171 289 101 2 0 10 280 253 35 -4 4 11 108 128 107

-7 1 8 130 169 78 -5 8 8 183 183 22 -3 3 9 111 180 111 -6 1 10 89 106 33 -3 4 11 0 97 1

-6 1 8 248 148 19 -4 8 8 146 138 35 -2 3 9 0 42 1 -5 1 10 279 278 15 -2 4 11 300 308 17

-5 1 8 447 381 14 -3 8 8 99 211 99 -1 3 9 442 422 15 -4 1 10 173 176 25 -1 4 11 111 104 110

-4 1 8 293 253 19 -2 8 8 243 279 22 0 3 9 126 35 125 -3 1 10 257 255 21 -3 5 11 0 81 1

-3 1 8 486 445 12 -1 8 8 370 369 18 1 3 9 193 232 85 -2 1 10 261 245 23 -2 5 11 0 10 1

-2 1 8 324 299 18 0 8 8 0 108 1 2 3 9 205 152 88 -1 1 10 62 57 61

-1 1 8 170 191 82 1 8 8 160 145 160 3 3 9 233 213 56 0 1 10 234 242 26
