# Supplementary material for: Structural studies of two protonated forms of a C2 symmetrical optically active cyclam derivative
Source: Royal Society of Chemistry journal article supplement (doi:10.1039/a904998c), 2000-01-01
Supplement: a904998cxray2.doc [file a904998cxray2.doc]

# Supplementary data

**Structural studies of two protonated forms of a *C2* symmetrical optically active cyclam derivative**

**Ignacio Alfonso, Covadonga Astorga, Francisca Rebolledo,* Vicente Gotor,* Santiago García-Granda and Ana Tesouro**

*Departamento de Química Orgánica e Inorgánica, Universidad de Oviedo,. 33071 Oviedo, Spain*

*Departamento de Química Física y Analítica, Universidad de Oviedo, 33071 Oviedo, Spain*

**Supplementary materials for X ray of C14H34N4Br4H2O**

COMPOUND CODE: **3H44+Br44-**

**Crystal data**.

C14H36N4Br4O, Mr =596.11, Monoclinic, space group P21 a = 7.99(1) Å, b = 15.168(2) Å, c= 9.713(1) Å,  = 106.7(6), V= 1127.(1) Å3, Z = 2, Dx = 1.756 Mg m-3, Mo Kradiation (graphite crystal Monochromator, = 0.71073 Å),  = 7.147 mm-1, F(000) = 592.0, T = 293(2)K. Final conventional R =

0.047 and wR2= 0.0971 for 2233 ´observed´ reflections and 253 variables.

**X-ray experimental**.

Colorless crystal, size 0.26 x 0.13 x 0.07 mm. Throughout the experiment Mo K radiation was used with a graphite crystal Monochromator on an Nonius CAD4 single-crystal diffractometer ( = 0.71073 Å). The unit-cell dimensions were determined from the angular settings of 25 reflections with  between 13 and 15°. The space group was determined to be P21, from systematic absences and the structure determination. The intensity data of 2378 reflections, in hkl range (-9,-1,0) to (9, 18, 11) and  limits (2.19 <  < 24.98°) were measured, using the w-2 scan technique and a variable scan rate with a maximum scan time of 60 s per reflection. The intensity of the primary beam was checked throughout the data collection by monitoring three standard reflections every 60 min. The final drift correction factors were between 0.991 and 1.038. On all reflections a profile analysis was performed (Lehmann & Larsen, 1974; Grant & Gabe, 1978). Some double measured reflections were averaged, Rint=∑I-<I>/∑I=0.0791 resulting in 2378 ‘unique’ reflections of which only 2233 were observed with I>2(I). Lorentz and polarization corrections were applied and the data were reduced to *Fo*2 values. The structure was solved by Patterson methods and phase expansion using *DIRDIF* (Beurskens, 1992). Isotropic least-squares refinement on F2 was made using *SHELXL93* (Sheldrick, 1993). At this stage an empirical absorption correction was applied using *XABS2* (Parking S., Moezzi B. and Hope, H., 1995). The relative maximum and minimum transmision factors were, respectively, 0.1693 and 1.000.

During the final stages of the refinement the positional parameters and the anisotropic thermal parameters of the non-H atoms were refined. All non-hydrogen atoms were anisotropically refined**.** Hydrogen atoms attached to all carbon atoms were found by low angle difference Fourier synthesis, but due to their unstability they were refined riding from the ideal geometry using common thermal parameters. Most of H-atoms bonded to nitrogens were also located by difference Fourier synthesis. Water H-atoms were fixed and refined taken as reference the oxigen thermal parameter. The final conventional agreement factors were *R* = 0.0467 and *wR2* = 0.0971 for the 3289 ’observed’ reflections and 253 variables. The function minimized was [∑w(Fo2 - Fc2)2/∑w(Fo2)2]1/2,w = 1/[2(Fo2)+(0.0274P)2+10.09P] with (Fo2) from counting statistics and P = (Max(Fo2,O)+2*Fc2)/3 . The final difference Fourier map showed no peaks higher than 0.783 e Å-3, nor deeper than -1.078 e Å-3. Fig. 1 shows the atomic numbering scheme (Spek, 1982).

Atomic scattering factors were taken from *International Tables for X-ray Crystallography* (1974). Geometrical calculations were made with *PARST* (Nardelli, 1983). All calculations were made at the University of Oviedo on the Scientific Computer Center and X-Ray group DEC/AXP-computers.

**Acknowledgements**

We thank DGICYT for support (PB96-0556).

***Footnote.**

Lists of structure amplitudes, anisotropic thermal parameters, H-atom parameters, distances and angles involving H atoms, hydrogen-bond distances and angles, least-squares planes data and principal torsion angles have been deposited.

**References**

BEURSKENS, P.T., ADMIRAALL, G., BEURSKENS, G., BOSMAN, W.P., GARCIA-GRANDA, S., GOULD, R.O., SMITS, J.M.M. & SMYKALLA, C. (1992).

*DIRDIF user´s guide.* Technical report. Crystallography Laboratory. University of Nijmegen. The Netherlands.

Grant, D.F. & Gabe, E.J. (1978).

*J. Appl. Cryst.* **11**, 114-120.

*International Tables for X-ray Crystallography*, (1974).

Vol. IV. Byrmingham: Kynoch Press.

(Present distributor Kluwer Academic Publishers, Dordrecht)

Lehman, M.S. & Larsen, F.K. (1974).

*Acta Cryst*. A**30**, 580-584

Nardelli, M. (1983).

*Comput. Chem*. **7**, 95-98.

Parking S., Moezzi B. and Hope, H.(1995).J.Appl. Cryst. **28**, 53-56.

Sheldrick, G.M. (1993)

*SHELXL93.* In Crystallographic Computing **6**. Ed. H.D. FLACK,

P. PARKANYI and K. SIMON. IUCr/Oxford. U. Press.

Spek, A.L. (1982)

*The EUCLID package.* In Computational Crystallography. Edited by D.

SAYRE, p. 528. Oxford: Clarendon Press

**Crystal data and structure refinement for 3H44+Br44-.**

Identification code 3H44+Br44-

Empirical formula C14 H36 Br4 N4 O

Formula weight 596.11

Temperature 293(2) K

Wavelength 0.71073 Å

Crystal system Monoclinic

Space group P21

Unit cell dimensions a = 7.990(10) Å  = 90 .

b = 15.168(2) Å  = 106.69(6) .

c = 9.7127(13) Å  = 90 .

Volume 1127.5(14) Å3

Z 2

Density (calculated) 1.756 Mg/m3

Absorption coefficient 7.147 mm-1

F(000) 592

Crystal size 0.26 x 0.13 x 0.07 mm

Theta range for data collection 2.19 to 24.98 .

Index ranges -9<=h<=9, -1<=k<=18, 0<=l<=11

Reflections collected 2378

Independent reflections 2233 [R(int) = 0.0791]

Refinement method Full-matrix least-squares on F2

Data / restraints / parameters 2233 / 10 / 253

Goodness-of-fit on F2 1.037

Final R indices [I>2(I)] R1 = 0.0467, wR2 = 0.0971

R indices (all data) R1 = 0.1450, wR2 = 0.1320

Absolute structure parameter 0.02(5)

Largest diff. peak and hole 0.783 and -1.078 e.Å-3

**Atomic coordinates ( x 104) and equivalent isotropic displacement parameters (A2 x 103) for 3H44+Br44-. U(eq) is defined as one third of the trace of the orthogonalized Uij tensor.**

________________________________________________________________

x y z U(eq) ________________________________________________________________

Br(1) -1293(3) -4923(1) -358(2) 37(1)

Br(2) 4730(3) 4924(2) 4594(2) 52(1)

Br(3) -2624(3) 2316(2) 2232(2) 56(1)

Br(4) 3788(3) 2339(2) 7905(2) 53(1)

N(1) 2503(16) -4716(10) -3132(15) 31(4)

N(2) -1642(16) -5940(9) -3433(16) 30(4)

N(3) 960(17) -7814(9) -260(16) 36(4)

N(4) 4068(15) -6440(9) 776(14) 31(4)

C(1) 581(22) -4852(19) -3432(21) 40(6)

C(2) -381(26) -4291(14) -4697(19) 35(5)

C(3) -280(25) -4657(12) -6118(20) 25(5)

C(4) -838(27) -5603(12) -6350(21) 30(5)

C(5) 278(25) -6179(12) -5086(17) 30(5)

C(6) 110(25) -5830(14) -3666(21) 31(5)

C(7) -2400(28) -6859(13) -3548(24) 43(6)

C(8) -1168(26) -7542(15) -2640(20) 42(6)

C(9) -609(26) -7313(14) -1054(21) 41(5)

C(10) 1869(28) -7512(13) 1214(22) 41(6)

C(11) 2558(25) -6566(13) 1368(20) 33(5)

C(12) 4649(26) -5517(13) 700(21) 34(5)

C(13) 3507(21) -4964(15) -492(15) 29(4)

C(14) 3779(25) -5189(13) -1925(19) 34(5)

O(1W) 3878(38) 2121(34) 4429(28) 179(13)

________________________________________________________________

**Bond lengths [Å] and angles [] for 3H44+Br44-.**

_____________________________________________________________

N(1)-C(1) 1.49(2)

N(1)-C(14) 1.50(2)

N(2)-C(6) 1.49(2)

N(2)-C(7) 1.51(2)

N(3)-C(10) 1.48(2)

N(3)-C(9) 1.48(2)

N(4)-C(12) 1.48(2)

N(4)-C(11) 1.49(2)

C(1)-C(2) 1.51(3)

C(1)-C(6) 1.53(3)

C(2)-C(3) 1.51(2)

C(3)-C(4) 1.50(2)

C(4)-C(5) 1.56(2)

C(5)-C(6) 1.52(2)

C(7)-C(8) 1.52(3)

C(8)-C(9) 1.52(3)

C(10)-C(11) 1.53(3)

C(12)-C(13) 1.51(2)

C(13)-C(14) 1.51(2)

C(1)-N(1)-C(14) 121(2)

C(6)-N(2)-C(7) 118(2)

C(10)-N(3)-C(9) 117(2)

C(12)-N(4)-C(11) 116(2)

N(1)-C(1)-C(2) 110(2)

N(1)-C(1)-C(6) 111(2)

C(2)-C(1)-C(6) 112(2)

C(3)-C(2)-C(1) 113(2)

C(4)-C(3)-C(2) 113(2)

C(3)-C(4)-C(5) 110(2)

C(6)-C(5)-C(4) 110(2)

N(2)-C(6)-C(5) 116(2)

N(2)-C(6)-C(1) 107(2)

C(5)-C(6)-C(1) 113(2)

N(2)-C(7)-C(8) 114(2)

C(9)-C(8)-C(7) 113(2)

N(3)-C(9)-C(8) 112(2)

N(3)-C(10)-C(11) 117(2)

N(4)-C(11)-C(10) 113(2)

N(4)-C(12)-C(13) 116(2)

C(12)-C(13)-C(14) 112(2)

N(1)-C(14)-C(13) 112(2)

_____________________________________________________________

**Anisotropic displacement parameters (Å2 x 103) for 3H44+Br44-.**

**The anisotropic displacement factor exponent takes the form:**

**-2 2 [ h2 a*2 U11 + ... + 2 h k a* b* U12 ]**

_______________________________________________________________________

U11 U22 U33 U23 U13 U12

_______________________________________________________________________

Br(1) 43(1) 31(1) 37(1) -5(1) 12(1) -1(1)

Br(2) 36(1) 82(2) 38(1) 2(2) 10(1) 7(2)

Br(3) 57(2) 32(1) 62(2) 4(2) -9(1) 5(1)

Br(4) 61(2) 49(1) 54(2) -8(2) 27(1) 1(2)

N(1) 43(10) 27(10) 29(8) -2(8) 17(8) -12(8)

N(2) 39(10) 28(9) 28(9) -4(8) 15(8) -2(8)

N(3) 52(11) 17(10) 39(10) 13(8) 13(8) 6(8)

N(4) 24(9) 37(10) 26(8) 1(8) -2(7) 12(8)

C(1) 14(9) 63(17) 40(12) -10(14) 2(9) -3(13)

C(2) 35(12) 30(12) 31(12) -12(10) -3(10) -3(10)

C(3) 30(12) 17(11) 26(11) 11(8) 3(9) 6(8)

C(4) 34(13) 17(11) 34(12) -6(10) 0(10) -9(9)

C(5) 45(12) 14(10) 32(12) -2(9) 15(10) 3(9)

C(6) 30(12) 25(12) 31(12) 6(10) 1(9) 3(10)

C(7) 46(15) 22(12) 62(15) 0(11) 17(12) 1(11)

C(8) 56(14) 31(15) 36(12) -1(11) 9(11) 7(12)

C(9) 47(13) 38(13) 43(13) 9(11) 23(11) 18(11)

C(10) 58(15) 26(15) 39(13) 13(10) 16(11) 13(11)

C(11) 42(12) 31(12) 30(11) 3(10) 16(9) -1(10)

C(12) 27(12) 36(13) 29(11) 5(10) -11(9) 2(10)

C(13) 27(10) 35(11) 22(9) -3(11) 3(8) 2(12)

C(14) 36(14) 30(12) 35(12) 2(10) 10(11) 4(10)

O(1W) 169(26) 232(37) 115(22) 22(29) 9(19) -46(30)

_______________________________________________________________________

**Hydrogen coordinates ( x 104) and isotropic**

**displacement parameters (A2 x 103) for 3H44+Br44-.**

________________________________________________________________

x y z U(eq)

________________________________________________________________

H(11) 2822(33) -4029(12) -3018(79) 41(19)

H(12) 2871(66) -5036(45) -3984(71) 41(19)

H(21) -2178(37) -5694(42) -4290(43) 41(19)

H(22) -1814(56) -5579(36) -2751(63) 41(19)

H(31) 1833(66) -7916(41) -898(66) 41(19)

H(32) 1282(36) -8490(12) 8(81) 41(19)

H(41) 5046(33) -6701(15) 1321(68) 41(19)

H(42) 3732(56) -6732(33) -66(29) 41(19)

H(1) 244(22) -4653(19) -2589(21) 42(13)

H(2A) -1598(26) -4247(14) -4714(19) 50(21)

H(2B) 109(26) -3701(14) -4573(19) 50(21)

H(3A) -1015(25) -4304(12) -6890(20) 50(21)

H(3B) 913(25) -4605(12) -6164(20) 50(21)

H(4A) -687(27) -5810(12) -7251(21) 50(21)

H(4B) -2065(27) -5654(12) -6402(21) 50(21)

H(5A) -119(25) -6786(12) -5216(17) 50(21)

H(5B) 1494(25) -6164(12) -5081(17) 50(21)

H(6) 946(25) -6158(14) -2901(21) 42(13)

H(7A) -2714(28) -7042(13) -4546(24) 42(13)

H(7B) -3463(28) -6843(13) -3255(24) 42(13)

H(8A) -1744(26) -8111(15) -2771(20) 42(13)

H(8B) -138(26) -7589(15) -2975(20) 42(13)

H(9A) -363(26) -6687(14) -941(21) 42(13)

H(9B) -1559(26) -7442(14) -649(21) 42(13)

H(10A) 2846(28) -7904(13) 1613(22) 42(13)

H(10B) 1070(28) -7573(13) 1795(22) 42(13)

H(11A) 1621(25) -6172(13) 874(20) 42(13)

H(11B) 2911(25) -6407(13) 2378(20) 42(13)

H(12A) 5818(26) -5527(13) 590(21) 42(13)

H(12B) 4722(26) -5231(13) 1609(21) 42(13)

H(13A) 3771(21) -4345(15) -284(15) 42(13)

H(13B) 2291(21) -5058(15) -538(15) 42(13)

H(14A) 4959(25) -5031(13) -1914(19) 42(13)

H(14B) 3645(25) -5820(13) -2082(19) 42(13)

H(1W) 4165(477) 1826(419) 5481(73) 268

H(2W) 4980(322) 2254(446) 4273(370) 268

________________________________________________________________

**Torsion Angles(). (With esd's).**

________________________________________________________________

C1 -N1 -C14 -C13 -61.(2) C14 -N1 -C1 -C6 -56.(2)

C14 -N1 -C1 -C2 180.(2) C6 -N2 -C7 -C8 51.(2)

C7 -N2 -C6 -C1 -178.(2) C7 -N2 -C6 -C5 56.(2)

C9 -N3 -C10 -C11 -59.(2) C10 -N3 -C9 -C8 167.(2)

C11 -N4 -C12 -C13 -76.(2) C12 -N4 -C11 -C10 172.(2)

N1 -C1 -C6 -N2 160.(2) C2 -C1 -C6 -N2 -77.(2)

N1 -C1 -C6 -C5 -72.(2) N1 -C1 -C2 -C3 75.(2)

C2 -C1 -C6 -C5 51.(2) C6 -C1 -C2 -C3 -49.(2)

C1 -C2 -C3 -C4 53.(2) C2 -C3 -C4 -C5 -56.(2)

C3 -C4 -C5 -C6 57.(2) C4 -C5 -C6 -C1 -55.(2)

C4 -C5 -C6 -N2 68.(2) N2 -C7 -C8 -C9 59.(2)

C7 -C8 -C9 -N3 -163.(2) N3 -C10 -C11 -N4 -70.(2)

N4 -C12 -C13 -C14 -76.(2) C12 -C13 -C14 -N1 173.(2)

**Torsion Angles() Involving Hydrogen Atoms. (With esd's).**

________________________________________________________________

C1 -N1 -C14 -H14A 178.(2) C1 -N1 -C14 -H14B 60.(3)

H12 -N1 -C14 -C13 -174.(4) H11 -N1 -C14 -C13 68.(3)

C14 -N1 -C1 -H1 62.(3) H11 -N1 -C1 -H1 -65.(4)

H11 -N1 -C1 -C6 177.(3) H11 -N1 -C1 -C2 53.(3)

H12 -N1 -C1 -H1 171.(4) H12 -N1 -C1 -C6 53.(4)

H12 -N1 -C1 -C2 -72.(4) H11 -N1 -C14 -H14B -171.(3)

H11 -N1 -C14 -H14A -53.(4) H12 -N1 -C14 -H14B -53.(4)

H12 -N1 -C14 -H14A 65.(4) C6 -N2 -C7 -H7A -70.(3)

C6 -N2 -C7 -H7B 173.(2) H22 -N2 -C6 -C1 -34.(4)

H21 -N2 -C6 -C1 75.(3) H22 -N2 -C6 -C5 -161.(4)

H21 -N2 -C6 -C5 -51.(4) C7 -N2 -C6 -H6 -64.(3)

H21 -N2 -C6 -H6 -170.(4) H22 -N2 -C6 -H6 80.(4)

H21 -N2 -C7 -H7B -88.(4) H21 -N2 -C7 -H7A 29.(4)

H21 -N2 -C7 -C8 151.(3) H22 -N2 -C7 -H7B 31.(5)

H22 -N2 -C7 -H7A 148.(5) H22 -N2 -C7 -C8 -90.(4)

C9 -N3 -C10 -H10A 179.(2) C9 -N3 -C10 -H10B 63.(3)

H32 -N3 -C9 -C8 -66.(5) H31 -N3 -C9 -C8 35.(4)

C10 -N3 -C9 -H9B -72.(3) C10 -N3 -C9 -H9A 46.(3)

H31 -N3 -C9 -H9B 156.(4) H31 -N3 -C9 -H9A -86.(4)

H32 -N3 -C9 -H9B 55.(5) H32 -N3 -C9 -H9A 173.(4)

H31 -N3 -C10 -H10B -166.(4) H31 -N3 -C10 -H10A -50.(4)

H31 -N3 -C10 -C11 72.(4) H32 -N3 -C10 -H10B -84.(3)

H32 -N3 -C10 -H10A 32.(4) H32 -N3 -C10 -C11 154.(3)

C11 -N4 -C12 -H12A 163.(2) C11 -N4 -C12 -H12B 46.(3)

H42 -N4 -C11 -C10 44.(3) H41 -N4 -C11 -C10 -71.(4)

C12 -N4 -C11 -H11B -67.(2) C12 -N4 -C11 -H11A 50.(3)

H41 -N4 -C11 -H11B 50.(4) H41 -N4 -C11 -H11A 168.(4)

H42 -N4 -C11 -H11B 166.(3) H42 -N4 -C11 -H11A -77.(4)

H41 -N4 -C12 -H12B -76.(4) H41 -N4 -C12 -H12A 40.(4)

H41 -N4 -C12 -C13 162.(3) H42 -N4 -C12 -H12B 167.(4)

H42 -N4 -C12 -H12A -77.(4) H42 -N4 -C12 -C13 45.(4)

N1 -C1 -C6 -H6 46.(3) N1 -C1 -C2 -H2A -164.(2)

N1 -C1 -C2 -H2B -46.(3) H1 -C1 -C6 -N2 42.(3)

C2 -C1 -C6 -H6 169.(2) H1 -C1 -C6 -C5 170.(2)

C6 -C1 -C2 -H2B -170.(2) C6 -C1 -C2 -H2A 73.(3)

H1 -C1 -C2 -H2B 71.(3) H1 -C1 -C2 -H2A -46.(3)

H1 -C1 -C2 -C3 -168.(2) H1 -C1 -C6 -H6 -72.(3)

C1 -C2 -C3 -H3A 174.(2) C1 -C2 -C3 -H3B -69.(3)

H2A -C2 -C3 -H3B 170.(2) H2A -C2 -C3 -H3A 53.(3)

H2A -C2 -C3 -C4 -68.(3) H2B -C2 -C3 -H3B 53.(3)

H2B -C2 -C3 -H3A -64.(3) H2B -C2 -C3 -C4 174.(2)

C2 -C3 -C4 -H4A -177.(2) C2 -C3 -C4 -H4B 64.(3)

H3A -C3 -C4 -H4B -57.(3) H3A -C3 -C4 -H4A 62.(3)

H3A -C3 -C4 -C5 -178.(2) H3B -C3 -C4 -H4B -174.(2)

H3B -C3 -C4 -H4A -56.(3) H3B -C3 -C4 -C5 65.(2)

C3 -C4 -C5 -H5A 177.(2) C3 -C4 -C5 -H5B -64.(2)

H4A -C4 -C5 -H5B 57.(3) H4A -C4 -C5 -H5A -62.(3)

H4A -C4 -C5 -C6 177.(2) H4B -C4 -C5 -H5B 176.(2)

H4B -C4 -C5 -H5A 57.(3) H4B -C4 -C5 -C6 -64.(3)

C4 -C5 -C6 -H6 -173.(2) H5A -C5 -C6 -C1 -176.(2)

H5A -C5 -C6 -N2 -52.(3) H5B -C5 -C6 -C1 66.(2)

H5B -C5 -C6 -N2 -171.(2) H5A -C5 -C6 -H6 67.(3)

H5B -C5 -C6 -H6 -52.(3) N2 -C7 -C8 -H8A -180.(2)

N2 -C7 -C8 -H8B -62.(3) H7A -C7 -C8 -H8B 59.(3)

H7A -C7 -C8 -H8A -58.(3) H7A -C7 -C8 -C9 -180.(2)

H7B -C7 -C8 -H8B 176.(3) H7B -C7 -C8 -H8A 59.(3)

H7B -C7 -C8 -C9 -63.(3) C7 -C8 -C9 -H9A -42.(3)

C7 -C8 -C9 -H9B 76.(3) H8A -C8 -C9 -N3 76.(3)

H8B -C8 -C9 -N3 -41.(3) H8A -C8 -C9 -H9B -45.(3)

H8A -C8 -C9 -H9A -163.(3) H8B -C8 -C9 -H9B -162.(3)

H8B -C8 -C9 -H9A 80.(3) N3 -C10 -C11 -H11A 51.(3)

N3 -C10 -C11 -H11B 169.(2) H10A-C10 -C11 -N4 52.(3)

H10B-C10 -C11 -N4 168.(2) H10A-C10 -C11 -H11B -69.(3)

H10A-C10 -C11 -H11A 173.(3) H10B-C10 -C11 -H11B 47.(3)

H10B-C10 -C11 -H11A -71.(3) N4 -C12 -C13 -H13A 163.(2)

N4 -C12 -C13 -H13B 45.(3) H12A-C12 -C13 -H13B 167.(2)

H12A-C12 -C13 -H13A -75.(3) H12A-C12 -C13 -C14 46.(3)

H12B-C12 -C13 -H13B -77.(3) H12B-C12 -C13 -H13A 41.(3)

H12B-C12 -C13 -C14 162.(2) C12 -C13 -C14 -H14A -65.(2)

C12 -C13 -C14 -H14B 52.(3) H13A-C13 -C14 -N1 -66.(2)

H13B-C13 -C14 -N1 52.(2) H13A-C13 -C14 -H14B 173.(2)

H13A-C13 -C14 -H14A 56.(3) H13B-C13 -C14 -H14B -69.(3)

H13B-C13 -C14 -H14A 174.(2)

**Angles Between Least-Squares Planes (). (With esd's).**

________________________________________________________________

**Plane 1**: N1 C1 C6

**Plane 2**: C1 C6 N2

**Plane 3**: N4 C11 C10

**Plane 4**: C11 C10 N3

**Plane -Plane** **Angle(e.s.d.)** **Plane -Plane**  **Angle(e.s.d.)**

1 2 160.(1) 1 3 34.(1)

1 4 104.(2) 2 3 166.(1)

2 4 96.(2) 3 4 70.(2)

**Geometrical parameters for hydrogen bonding and other weaker interactions. Distances (Å) and angles (°).**

Donor-H Donor...Acceptor H...Acceptor Donor-H......Acceptor

N2 -H22 N2 ....Br1 H22 ...Br1 N2 -H22 ...Br1

0.90(6) 3.30(2) 2.45(6) 158.(5)

N4 -H42 N4 ....N3 H42 ...N3 N4 -H42 ...N3

0.90 (4) 3.18(2) 2.72(5) 113.(3)

O1W -H1W O1W ....Br4 H1W ...Br4 O1W -H1W ...Br4

1.1(3) 3.41(3) 2.6(3) 134.(5)

N1 -H11 N1 ....Br3 i H11 ...Br3 i N1 -H11 ...Br3 i

1.07(2) 3.20(2) 2.20(3) 154.(2)

N3 -H32 N3 ....Br1 i H32 ...Br1 i N3 -H32 ...Br1 i

1.07(2) 3.25(1) 2.20(2) 167.(2)

N4 -H42 N4 ....Br4 ii H42 ...Br4 ii N4 -H42 ...Br4 ii

0.90 (4) 3.30(1) 2.43(4) 162.(3)

N1 -H12 N1 ....Br2 ii H12 ...Br2 ii N1 -H12 ...Br2 ii

1.07 (7) 3.26(2) 2.30(7) 148.(5)

N3 -H31 N3 ....Br4 ii H31 ...Br4 ii  N3 -H31 ...Br4 ii

1.07 (7) 3.26(2) 2.23 (7) 161.(5)

N2 -H21 N2 ....Br2 iii H21 ...Br2 iii N2 -H21 ...Br2 iii

0.90 (4) 3.26(1) 2.57(4) 133.(3)

N4 -H41 N4 ....Br3 iv H41 ...Br3 iv N4 -H41 ...Br3 iv

0.90 (3) 3.23(1) 2.35(3) 164.(3)

C1 -H1 C1 ....Br1 H1 ...Br1 C1 -H1 ...Br1

0.98(3) 3.71(2) 2.81 (2) 152.(2)

C2 -H2A C2 ....N2 H2A ...N2 C2 -H2A ...N2

0.97 (3) 3.08(3) 2.86(3) 94.(2)

C3 -H3B C3 ....N1 H3B ...N1 C3 -H3B ...N1

0.97(3) 3.11(2) 2.86(2) 96.(2)

C4 -H4B C4 ....N2 H4B ...N2 C4 -H4B ...N2

0.97(3) 3.12 (3) 2.84(3) 98.(2)

C5 -H5B C5 ....N1 H5B ...N1 C5 -H5B ...N1

0.97 (3) 3.12(2) 2.86(3) 96.(2)

C9 -H9A C9 ....Br1 H9A ...Br1 C9 -H9A ...Br1

0.97(3) 3.76(2) 2.88(2) 151.(2)

C9 -H9A C9 ....N2 H9A ...N2 C9 -H9A ...N2

0.97(3) 3.04(3) 2.60 (2) 108.(2)

C11 -H11A C11 ....Br1 H11A...Br1 C11 -H11A...Br1

0.97(3) 3.94(2) 2.97(2) 174.(2)

C13 -H13B C13 ....Br1 H13B...Br1 C13 -H13B...Br1

0.97(3) 3.88(2) 2.93(2) 166.(2)

C14 -H14B C14 ....N4 H14B...N4 C14 -H14B...N4

0.97(3) 3.19 (2) 2.86(2) 101.(2)

C14 -H14B C14 ....Br4 ii H14B...Br4 ii C14 -H14B...Br4 ii

0.97(3) 3.75(2) 2.80(2) 170.(2)

C10 -H10A C10 ....O1W v H10A...O1W v C10 -H10A...O1W v

0.97(3) 3.12(3) 2.62(3) 113.(2)

Symmetry Codes:

(i) -x,+y-1/2,-z

(ii) x,+y-1,+z-1

(iii) x-1,+y-1,+z-1

(iv) x+1,+y-1,+z

(v) x,+y-1,+z

**Ring puckering coordinates**

**following Cremer D. & Pople J.A., JACS (1975).97,1354**

**Ring 1**

**Atom Internal cartesian coordinates**

**X Y Z**

C3 0.0000(0.0001) 1.4341(0.0176) 0.2236(0.0147)

C4 1.2484(0.0204) 0.7523(0.0217) -0.2530(0.0151)

C5 1.2704(0.0177) -0.7242(0.0219) 0.2511(0.0158)

C6 0.0209(0.0222) -1.4485(0.0193) -0.2198(0.0148)

C1 -1.2720(0.0212) -0.7376(0.0229) 0.1903(0.0143)

C2 -1.2676(0.0218) 0.7238(0.0230) -0.1922(0.0148)

q2 = 0.0610(0.0219)

q3 = 0.5429(0.0201)

2 = 86.91(19.96)

**Total puckering amplitude**: QT = 0.5464(0.0203)

**Spherical polar angles**: 2 = 6.41(2.27)

**Asymmetry parameters**

**Following Nardelli M., Acta Cryst.(1983).C39,1141**

C3 C4 C5 C6 C1 C2

DS(C3)=0.0407(0.0104) DS(C3-C2)=0.3014(0.0085)

D2(C3)=0.2376(0.0070) D2(C3-C2)=0.0303(0.0084)

DS(C4)=0.0175(0.0104) DS(C4-C3)=0.3017(0.0085)

D2(C4)=0.2392(0.0070) D2(C4-C3)=0.0275(0.0085)

DS(C5)=0.0235(0.0102) DS(C5-C4)=0.3029(0.0085)

D2(C5)=0.2390(0.0069) D2(C5-C4)=0.0028(0.0084)
